# Supplementary material for: Perinatal Mental Illness in the Middle East and North Africa Region—A Systematic Overview
Source: PubMed Central journal article supplement (PMC7432515; doi:10.3390/ijerph17155487), 2020-07-29
Supplement: ijerph-17-05487-s001.pdf [file ijerph-17-05487-s001.pdf]

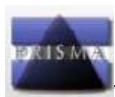

Table S1. PRISMA 2009 Checklist [1].

| Section/topic                      | #  | Checklist item                                                                                                                                                                                                                                                                                              | Reported on page #            |
|------------------------------------|----|-------------------------------------------------------------------------------------------------------------------------------------------------------------------------------------------------------------------------------------------------------------------------------------------------------------|-------------------------------|
| <b>TITLE</b>                       |    |                                                                                                                                                                                                                                                                                                             |                               |
| Title                              | 1  | Identify the report as a systematic review, meta-analysis, or both.                                                                                                                                                                                                                                         | 1                             |
| <b>ABSTRACT</b>                    |    |                                                                                                                                                                                                                                                                                                             |                               |
| Structured summary                 | 2  | Provide a structured summary including, as applicable: background; objectives; data sources; study eligibility criteria, participants, and interventions; study appraisal and synthesis methods; results; limitations; conclusions and implications of key findings; systematic review registration number. | 1                             |
| <b>INTRODUCTION</b>                |    |                                                                                                                                                                                                                                                                                                             |                               |
| Rationale                          | 3  | Describe the rationale for the review in the context of what is already known.                                                                                                                                                                                                                              | 2-3                           |
| Objectives                         | 4  | Provide an explicit statement of questions being addressed with reference to participants, interventions, comparisons, outcomes, and study design (PICOS).                                                                                                                                                  | 3                             |
| <b>METHODS</b>                     |    |                                                                                                                                                                                                                                                                                                             |                               |
| Protocol and registration          | 5  | Indicate if a review protocol exists, if and where it can be accessed (e.g., Web address), and, if available, provide registration information including registration number.                                                                                                                               | 3                             |
| Eligibility criteria               | 6  | Specify study characteristics (e.g., PICOS, length of follow-up) and report characteristics (e.g., years considered, language, publication status) used as criteria for eligibility, giving rationale.                                                                                                      | 3-4                           |
| Information sources                | 7  | Describe all information sources (e.g., databases with dates of coverage, contact with study authors to identify additional studies) in the search and date last searched.                                                                                                                                  | 4                             |
| Search                             | 8  | Present full electronic search strategy for at least one database, including any limits used, such that it could be repeated.                                                                                                                                                                               | Supplementary material (SM) 4 |
| Study selection                    | 9  | State the process for selecting studies (i.e., screening, eligibility, included in systematic review, and, if applicable, included in the meta-analysis).                                                                                                                                                   | 3-4                           |
| Data collection process            | 10 | Describe method of data extraction from reports (e.g., piloted forms, independently, in duplicate) and any processes for obtaining and confirming data from investigators.                                                                                                                                  | 3-5                           |
| Data items                         | 11 | List and define all variables for which data were sought (e.g., PICOS, funding sources) and any assumptions and simplifications made.                                                                                                                                                                       | 3-5                           |
| Risk of bias in individual studies | 12 | Describe methods used for assessing risk of bias of individual studies (including specification of whether this was done at the study or outcome level), and how this information is to be used in any data synthesis.                                                                                      | 5-8; SM 6                     |
| Summary measures                   | 13 | State the principal summary measures (e.g., risk ratio, difference in means).                                                                                                                                                                                                                               | 7-11                          |
| Synthesis of results               | 14 | Describe the methods of handling data and combining results of studies, if done, including measures of consistency (e.g., $I^2$ ) for each meta-analysis.                                                                                                                                                   | Not applicable                |
| Risk of bias across studies        | 15 | Specify any assessment of risk of bias that may affect the cumulative evidence (e.g., publication bias, selective reporting within studies).                                                                                                                                                                | 5-8                           |

|                               |    |                                                                                                                                                                                                          |                                     |
|-------------------------------|----|----------------------------------------------------------------------------------------------------------------------------------------------------------------------------------------------------------|-------------------------------------|
| Additional analyses           | 16 | Describe methods of additional analyses (e.g., sensitivity or subgroup analyses, meta-regression), if done, indicating which were pre-specified.                                                         | Not applicable                      |
| <b>RESULTS</b>                |    |                                                                                                                                                                                                          |                                     |
| Study selection               | 17 | Give numbers of studies screened, assessed for eligibility, and included in the review, with reasons for exclusions at each stage, ideally with a flow diagram.                                          | Figure 1                            |
| Study characteristics         | 18 | For each study, present characteristics for which data were extracted (e.g., study size, PICOS, follow-up period) and provide the citations.                                                             | Tables 3; Figure 2 and SM 5a and 5b |
| Risk of bias within studies   | 19 | Present data on risk of bias of each study and, if available, any outcome level assessment (see item 12).                                                                                                | Tables 1 & 2; SM 6                  |
| Results of individual studies | 20 | For all outcomes considered (benefits or harms), present, for each study: (a) simple summary data for each intervention group (b) effect estimates and confidence intervals, ideally with a forest plot. | Not applicable                      |
| Synthesis of results          | 21 | Present results of each meta-analysis done, including confidence intervals and measures of consistency.                                                                                                  | Not applicable                      |
| Risk of bias across studies   | 22 | Present results of any assessment of risk of bias across studies (see Item 15).                                                                                                                          | Tables 1-2; SM 6                    |
| Additional analysis           | 23 | Give results of additional analyses, if done (e.g., sensitivity or subgroup analyses, meta-regression [see Item 16]).                                                                                    | Not applicable                      |
| <b>DISCUSSION</b>             |    |                                                                                                                                                                                                          |                                     |
| Summary of evidence           | 24 | Summarize the main findings including the strength of evidence for each main outcome; consider their relevance to key groups (e.g., healthcare providers, users, and policy makers).                     | 12-14                               |
| Limitations                   | 25 | Discuss limitations at study and outcome level (e.g., risk of bias), and at review-level (e.g., incomplete retrieval of identified research, reporting bias).                                            | 14                                  |
| Conclusions                   | 26 | Provide a general interpretation of the results in the context of other evidence, and implications for future research.                                                                                  | 12-14                               |
| <b>FUNDING</b>                |    |                                                                                                                                                                                                          |                                     |
| Funding                       | 27 | Describe sources of funding for the systematic review and other support (e.g., supply of data); role of funders for the systematic review.                                                               | Not applicable                      |

**Table S2. PRISMA Harms checklist items [2].**

| Section/topic (page no)       | Item | PRISMA checklist item                                                                                                                                                                                                                                                                                       | PRISMA harms (minimum)                                                                      | Recommendations for reporting harms in systematic reviews (desirable)                                                                                                                                                                  | Check if done               |
|-------------------------------|------|-------------------------------------------------------------------------------------------------------------------------------------------------------------------------------------------------------------------------------------------------------------------------------------------------------------|---------------------------------------------------------------------------------------------|----------------------------------------------------------------------------------------------------------------------------------------------------------------------------------------------------------------------------------------|-----------------------------|
| <b>Title</b>                  |      |                                                                                                                                                                                                                                                                                                             |                                                                                             |                                                                                                                                                                                                                                        |                             |
| Title (3)                     | 1    | Identify the report as a systematic review, meta-analysis, or both.                                                                                                                                                                                                                                         | Specifically mention "harms" or other related terms, or the harm of interest in the review. | —                                                                                                                                                                                                                                      | Yes<br>Page 1               |
| <b>Abstract</b>               |      |                                                                                                                                                                                                                                                                                                             |                                                                                             |                                                                                                                                                                                                                                        |                             |
| Structured summary (4)        | 2    | Provide a structured summary including, as applicable: background; objectives; data sources; study eligibility criteria, participants, and interventions; study appraisal and synthesis methods; results; limitations; conclusions and implications of key findings; systematic review registration number. | —                                                                                           | Abstracts should report any analysis of harms undertaken in the review, if harms are a primary or secondary outcome.                                                                                                                   | Yes<br>Page 1               |
| <b>Introduction</b>           |      |                                                                                                                                                                                                                                                                                                             |                                                                                             |                                                                                                                                                                                                                                        |                             |
| Rationale (5)                 | 3    | Describe the rationale for the review in the context of what is already known.                                                                                                                                                                                                                              | —                                                                                           | It should clearly describe in introduction or in methods section which events are considered harms and provide a clear rationale for the specific harm(s), condition(s), and patient group(s) included in the review.                  | Yes<br>Page 2-3             |
| Objectives (5)                | 4    | Provide an explicit statement of questions being addressed with reference to participants, interventions, comparisons, outcomes, and study design (PICOS).                                                                                                                                                  | —                                                                                           | PICOS format should be specified, although in systematic reviews of harms the selection criteria for P, C, and O may be very broad (same intervention may have been used for heterogeneous indications in a diverse range of patients) | Yes<br>Page 3               |
| <b>Methods</b>                |      |                                                                                                                                                                                                                                                                                                             |                                                                                             |                                                                                                                                                                                                                                        |                             |
| Protocol and registration (6) | 5    | Indicate if a review protocol exists, if and where it can be accessed (eg, web address), and, if available, provide registration information including registration number.                                                                                                                                 | —                                                                                           | No specific additional information is required for systematic reviews of harms.                                                                                                                                                        | Yes<br>(PROSPERO)<br>Page 3 |
| Eligibility criteria (6)      | 6    | Specify study characteristics (eg, PICOS, length of follow-up) and report characteristics (eg, years considered, language, publication                                                                                                                                                                      | —                                                                                           | Report how handled relevant studies (based on population and intervention) when the outcomes of interest were not reported.                                                                                                            | Yes<br>Page 3-4             |

|                                         |    |                                                                                                                                                                                                                        |   |                                                                                                                                                                                                                                                                                                                                                                                                                                                                                                                                                                                     |                                                |
|-----------------------------------------|----|------------------------------------------------------------------------------------------------------------------------------------------------------------------------------------------------------------------------|---|-------------------------------------------------------------------------------------------------------------------------------------------------------------------------------------------------------------------------------------------------------------------------------------------------------------------------------------------------------------------------------------------------------------------------------------------------------------------------------------------------------------------------------------------------------------------------------------|------------------------------------------------|
|                                         |    | status) used as criteria for eligibility, giving rationale.                                                                                                                                                            |   | Report choices for specific study designs and length of follow-up.                                                                                                                                                                                                                                                                                                                                                                                                                                                                                                                  |                                                |
| Information sources (7)                 | 7  | Describe all information sources (eg, databases with dates of coverage, contact with study authors to identify additional studies) in the search and date last searched.                                               | — | Report if only searched for published data, or also sought data from unpublished sources, from authors, drug manufacturers and regulatory agencies. If includes unpublished data, provide the source and the process of obtaining it.                                                                                                                                                                                                                                                                                                                                               | Yes<br>Page 4-5                                |
| Search (7)                              | 8  | Present full electronic search strategy for at least one database, including any limits used, such that it could be repeated.                                                                                          | — | If additional searches were used specifically to identify adverse events, authors should present the full search process so it can be replicated.                                                                                                                                                                                                                                                                                                                                                                                                                                   | Yes<br>Page 4<br>Supplementary material (SM 4) |
| Study selection (8)                     | 9  | State the process for selecting studies (ie, screening, eligibility, included in systematic review, and, if applicable, included in the meta-analysis).                                                                | — | If only included studies reporting on adverse events of interest, defined if screening was based on adverse event reporting in title/abstract or full text. If no harms reported in the text, report if any attempt was made to retrieve relevant data from authors.                                                                                                                                                                                                                                                                                                                | Yes<br>Page 3-5                                |
| Data collection process (9)             | 10 | Describe method of data extraction from reports (eg, piloted forms, independently, in duplicate) and any processes for obtaining and confirming data from investigators.                                               | — | No specific additional information is required for systematic reviews of harms.                                                                                                                                                                                                                                                                                                                                                                                                                                                                                                     | Yes<br>Page 3-7                                |
| Data items (9)                          | 11 | List and define all variables for which data were sought (eg, PICOS, funding sources) and any assumptions and simplifications made.                                                                                    | — | Report the definition of the harm and seriousness used by each included study (if applicable). Report if multiple events occurred in the same individuals, if this information is available. Consider if the harm may be related to factors associated with participants (eg, age, sex, use of medications) or provider (eg, years of practice, level of training). Specify if information was extracted and how it was used in subsequent results. Specify if extracted details regarding the specific methods used to capture harms (active/passive and timing of adverse event). | Yes<br>Page 3-7                                |
| Risk of bias in individual studies (10) | 12 | Describe methods used for assessing risk of bias of individual studies (including specification of whether this was done at the study or outcome level), and how this information is to be used in any data synthesis. | — | The risk of bias assessment should be considered separately for outcomes of benefit and harms.                                                                                                                                                                                                                                                                                                                                                                                                                                                                                      | Yes<br>Table 1 & SM 6                          |
| Summary measures (11)                   | 13 | State the principal summary measures (eg, risk ratio, difference in means).                                                                                                                                            | — | No specific additional information is required for systematic reviews of harms.                                                                                                                                                                                                                                                                                                                                                                                                                                                                                                     | Yes<br>Table 3; Figure 2 & SM 8                |

|                                    |    |                                                                                                                                                                                                          |                                                                                                                    |                                                                                                                                                                                                                                                                                                                                           |                       |
|------------------------------------|----|----------------------------------------------------------------------------------------------------------------------------------------------------------------------------------------------------------|--------------------------------------------------------------------------------------------------------------------|-------------------------------------------------------------------------------------------------------------------------------------------------------------------------------------------------------------------------------------------------------------------------------------------------------------------------------------------|-----------------------|
| Synthesis of results (11)          | 14 | Describe the methods of handling data and combining results of studies, if done, including measures of consistency (eg, $I^2$ ) for each meta-analysis.                                                  | Specify how zero events were handled, if relevant.                                                                 |                                                                                                                                                                                                                                                                                                                                           | Not applicable        |
| Risk of bias across studies (11)   | 15 | Specify any assessment of risk of bias that may affect the cumulative evidence (eg, publication bias, selective reporting within studies).                                                               | —                                                                                                                  | Present the extent of missing information (studies without harms outcomes), any factors that may account for their absence, and whether these reasons may be related to the results.                                                                                                                                                      | Yes<br>Table 1 & SM 6 |
| Additional analyses (12)           | 16 | Describe methods of additional analyses (eg, sensitivity or subgroup analyses, meta-regression), if done, indicating which were prespecified.                                                            | —                                                                                                                  | Sensitivity analyses may be affected by different definitions, grading, and attribution of adverse events, as adverse events are typically infrequent or reported using heterogeneous classifications. Report the number of participants and studies included in each subgroup.                                                           | Yes<br>SM 5a & 5b     |
| <b>Results</b>                     |    |                                                                                                                                                                                                          |                                                                                                                    |                                                                                                                                                                                                                                                                                                                                           |                       |
| Study selection (13)               | 17 | Give numbers of studies screened, assessed for eligibility, and included in the review, with reasons for exclusions at each stage, ideally with a flow diagram.                                          | —                                                                                                                  | If a review addresses both efficacy and harms, display a flow diagram specific for each (efficacy and harm).                                                                                                                                                                                                                              | Yes<br>Figure 1       |
| Study characteristics (14)         | 18 | For each study, present characteristics for which data were extracted (eg, study size, PICOS, follow-up period) and provide the citations.                                                               | Define each harm addressed, how it was ascertained (eg, patient report, active search), and over what time period. | Add additional characteristics to: “P” (population) patient risk factors that were considered as possibly affecting the risk of the harm outcome. “I” (intervention) professional expertise/skills if relevant (for example if the intervention is a procedure). “T” (time) timing of all harm’s assessments and the length of follow-up. | Yes<br>Page 3-5       |
| Risk of bias within studies (15)   | 19 | Present data on risk of bias of each study and, if available, any outcome level assessment (see item 12).                                                                                                | —                                                                                                                  | Consider the possible sources of biases that could affect the specific harm under consideration within the review. Sample selection, dropouts and measurement of adverse events should be evaluated separately from the outcomes of benefit as described in item 12, above.                                                               | Yes<br>Table 1 & SM 6 |
| Results of individual studies (16) | 20 | For all outcomes considered (benefits or harms), present, for each study: (a) simple summary data for each intervention group (b) effect estimates and confidence intervals, ideally with a forest plot. | —                                                                                                                  | Report the actual numbers of adverse events in each study, separately for each intervention.                                                                                                                                                                                                                                              | Yes<br>SM 5a and 5b   |
| Synthesis of results (17)          | 21 | Present results of each meta-analysis done, including confidence intervals and measures of consistency.                                                                                                  | Describe any assessment of possible causality.                                                                     | If included data from unpublished sources, report clearly the data source and the impact of these studies to the final systematic review.                                                                                                                                                                                                 | Not applicable        |

|                                  |    |                                                                                                                                                                                    |   |                                                                                                                                                                                                                   |                           |
|----------------------------------|----|------------------------------------------------------------------------------------------------------------------------------------------------------------------------------------|---|-------------------------------------------------------------------------------------------------------------------------------------------------------------------------------------------------------------------|---------------------------|
| Risk of bias across studies (18) | 22 | Present results of any assessment of risk of bias across studies (see item 15).                                                                                                    | — | No specific additional information is required for systematic reviews of harms. See item 15 above.                                                                                                                | Not applicable            |
| Additional analysis (18)         | 23 | Give results of additional analyses, if done (eg, sensitivity or subgroup analyses, meta-regression (see item 16)).                                                                | — | No specific additional information is required for systematic reviews of harms.                                                                                                                                   | Not applicable            |
| <b>Discussion</b>                |    |                                                                                                                                                                                    |   |                                                                                                                                                                                                                   |                           |
| Summary of evidence (18)         | 24 | Summarise the main findings including the strength of evidence for each main outcome; consider their relevance to key groups (eg, healthcare providers, users, and policy makers). | — | No specific additional information is required for systematic reviews of harms.                                                                                                                                   | Yes<br>Page 12-14         |
| Limitations (18)                 | 25 | Discuss limitations at study and outcome level (eg, risk of bias), and at review level (eg, incomplete retrieval of identified research, reporting bias).                          | — | Recognise possible limitations of meta-analysis for rare adverse events (ie, quality and quantity of data), issues noted previously related to collection and reporting.                                          | Yes<br>Page 14            |
| Conclusions (19)                 | 26 | Provide a general interpretation of the results in the context of other evidence, and implications for future research.                                                            | — | State conclusions in coherence with the review findings. When adverse events were not identified we caution against the conclusion that the intervention is “safe,” when, in reality, its safety remains unknown. | Yes<br>Page 12-14         |
| <b>Funding</b>                   |    |                                                                                                                                                                                    |   |                                                                                                                                                                                                                   |                           |
| Funding (19)                     | 27 | Describe sources of funding for the systematic review and other support (eg, supply of data); role of funders for the systematic review.                                           | — | No specific additional information is required for systematic reviews of harms.                                                                                                                                   | Not applicable<br>Page 15 |

**Table S3. The PRISMA for Abstracts checklist [3].**

| TITLE                                     | CHECKLIST ITEM                                                                                                                                                                                       | REPORTED ON PAGE #         |
|-------------------------------------------|------------------------------------------------------------------------------------------------------------------------------------------------------------------------------------------------------|----------------------------|
| 1. Title:                                 | Identify the report as a systematic review, meta-analysis, or both.                                                                                                                                  | 1                          |
| <b>BACKGROUND</b>                         |                                                                                                                                                                                                      |                            |
| 2. Objectives:                            | The research question including components such as participants, interventions, comparators, and outcomes.                                                                                           | 1                          |
| <b>METHODS</b>                            |                                                                                                                                                                                                      |                            |
| 3. Eligibility criteria:                  | Study and report characteristics used as criteria for inclusion.                                                                                                                                     | 1                          |
| 4. Information sources:                   | Key databases searched and search dates.                                                                                                                                                             | 1                          |
| 5. Risk of bias:                          | Methods of assessing risk of bias.                                                                                                                                                                   | 1                          |
| <b>RESULTS</b>                            |                                                                                                                                                                                                      |                            |
| 6. Included studies:                      | Number and type of included studies and participants and relevant characteristics of studies.                                                                                                        | 1                          |
| 7. Synthesis of results:                  | Results for main outcomes (benefits and harms), preferably indicating the number of studies and participants for each. If meta-analysis was done, include summary measures and confidence intervals. | 1                          |
| 8. Description of the effect:             | Direction of the effect (i.e. which group is favoured) and size of the effect in terms meaningful to clinicians and patients.                                                                        | Not applicable             |
| <b>DISCUSSION</b>                         |                                                                                                                                                                                                      |                            |
| 9. Strengths and Limitations of evidence: | Brief summary of strengths and limitations of evidence (e.g. inconsistency, imprecision, indirectness, or risk of bias, other supporting or conflicting evidence)                                    | 1                          |
| 10. Interpretation:                       | General interpretation of the results and important implications                                                                                                                                     | 1                          |
| <b>OTHER</b>                              |                                                                                                                                                                                                      |                            |
| 11. Funding:                              | Primary source of funding for the review.                                                                                                                                                            | None                       |
| 12. Registration:                         | Registration number and registry name.                                                                                                                                                               | PROSPERO<br>CRD42017076736 |

Table S4. Search strategy.

| Database/ Search strategy<br>PubMed                                                                                                                                                                                                                                                                                                                                                                                                                                                                                                                                                                                                                                                                                                                                                                                                                                                                                                                                                                                                                                                                                                                                                                                                                                                                                                                                                                                                                                                                                                                                                                                                                                                                                                                                                                                                                                                                                                                                                                                                                                                                                                                                                                                                                                                                                                                                                                                                                                                                                                                                                                                                                                                                                                                                                                                                                                                                                                                                                                                                                                                                                                                                                                                                                                                                                                                                                                                                                                                                                                                                                                                                                                                                                                                                                                                                                                                                                                                                                                         | Notes                                                                                                                                                     | Items found | Date Last Updated |
|-------------------------------------------------------------------------------------------------------------------------------------------------------------------------------------------------------------------------------------------------------------------------------------------------------------------------------------------------------------------------------------------------------------------------------------------------------------------------------------------------------------------------------------------------------------------------------------------------------------------------------------------------------------------------------------------------------------------------------------------------------------------------------------------------------------------------------------------------------------------------------------------------------------------------------------------------------------------------------------------------------------------------------------------------------------------------------------------------------------------------------------------------------------------------------------------------------------------------------------------------------------------------------------------------------------------------------------------------------------------------------------------------------------------------------------------------------------------------------------------------------------------------------------------------------------------------------------------------------------------------------------------------------------------------------------------------------------------------------------------------------------------------------------------------------------------------------------------------------------------------------------------------------------------------------------------------------------------------------------------------------------------------------------------------------------------------------------------------------------------------------------------------------------------------------------------------------------------------------------------------------------------------------------------------------------------------------------------------------------------------------------------------------------------------------------------------------------------------------------------------------------------------------------------------------------------------------------------------------------------------------------------------------------------------------------------------------------------------------------------------------------------------------------------------------------------------------------------------------------------------------------------------------------------------------------------------------------------------------------------------------------------------------------------------------------------------------------------------------------------------------------------------------------------------------------------------------------------------------------------------------------------------------------------------------------------------------------------------------------------------------------------------------------------------------------------------------------------------------------------------------------------------------------------------------------------------------------------------------------------------------------------------------------------------------------------------------------------------------------------------------------------------------------------------------------------------------------------------------------------------------------------------------------------------------------------------------------------------------------------------------------|-----------------------------------------------------------------------------------------------------------------------------------------------------------|-------------|-------------------|
| ("Depression"[Mesh] OR "Depressive Disorder"[Mesh] OR "Bipolar Disorder"[Mesh] OR "Adjustment Disorders"[Mesh] OR "Affective Disorders, Psychotic"[Mesh] OR Depress*[Text Word] OR Melancholi*[Text Word] OR "Involutional Psychosis"[Text Word] OR "Involutional Psychoses"[Text Word] OR "Involutional Paraphrenia"[Text Word] OR "Involutional Paraphrenias"[Text Word] OR Dysthymi*[Text Word] OR "Reactive Disorders"[Text Word] OR "Reactive Disorder"[Text Word] OR "Adjustment Disorder"[Text Word] OR "Adjustment Disorders"[Text Word] OR "Anniversary Reaction"[Text Word] OR "Anniversary Reactions"[Text Word] OR "Transient Situational Disturbance"[Text Word] OR Bipolar[Text Word] OR Manic[Text Word] OR Mania[Text Word] OR Manias[Text Word] OR "Affective Psychoses"[Text Word] OR "Affective Psychosis"[Text Word] OR "Psychotic Affective Disorders"[Text Word] OR "Psychotic Mood Disorders"[Text Word] OR "Psychotic Mood Disorder"[Text Word] OR "Psychotic Affective Disorder"[Text Word] Or "Anxiety"[Mesh] OR "Anxiety Disorders"[Mesh] OR Hypervigilance[Text Word] OR Nervousness[Text Word] OR Anxiety[Text Word] OR Anxieties[Text Word] OR " Fear*[Text Word] OR Phobia[Text Word] OR GAD[Text Word] OR SAD[Text Word] OR PD[Text Word] OR Panic[Text Word] OR "overanxious disorder"[Text Word] OR OAD[Text Word] OR obsessive[Text Word] OR OCD[Text Word] OR obsession[Text Word] OR compulsion[Text Word] OR compulsive[Text Word] or "Suicide"[Mesh] OR "Self-Injurious Behavior"[Mesh] OR Suicid*[Text Word] OR Parasuicide[Text Word] OR Parasuicides[Text Word] OR "Deliberate self harm"[Text Word] OR "Deliberate self-harm"[Text Word] OR DSH[Text Word] OR "Self injurious behavior"[Text Word] OR "Self Injurious"[Text Word] OR "Self-Injurious"[Text Word] OR "Self Injury"[Text Word] OR "Self-Injury"[Text Word] OR "Self Injuries"[Text Word] OR "Self-Injuries"[Text Word] OR "Self-Destructive"[Text Word] OR "Self Destructive"[Text Word] OR "Non-Suicidal"[Text Word] OR "Non Suicidal"[Text Word] OR NonSuicidal[Text Word] OR Self-Harm[Text Word] OR "Self Harm"[Text Word] OR self-inflict[Text Word] OR "self inflict"[Text Word] OR selfinflict[Text Word] OR selfmutilation[Text Word] OR "self-mutilation"[Text Word] OR "self mutilation"[Text Word] OR "suicide attempt"[Text Word] OR "non suicidal"[Text Word] OR non-suicidal[Text Word] OR nonsuicidal[Text Word] OR "suicide ideation"[Text Word] OR "suicide-ideation"[Text Word) AND ("Qatar"[Mesh] OR "Bahrain"[Mesh] OR "Oman"[Mesh] OR "Saudi Arabia"[Mesh] OR "Kuwait"[Mesh] OR "United Arab Emirates"[Mesh] OR "Yemen"[Mesh] OR "Egypt"[Mesh] OR "Jordan"[Mesh] OR "Lebanon"[Mesh] OR "Syria"[Mesh] OR "Iraq"[Mesh] OR "Algeria"[Mesh] OR "Libya"[Mesh] OR "Morocco"[Mesh] OR "Tunisia"[Mesh] OR "Djibouti"[Mesh] OR "Sudan"[Mesh] OR "South Sudan"[Mesh] OR "Pakistan"[Mesh] OR "Africa, Northern"[Mesh] OR "Africa, Eastern"[Mesh] OR "middle east"[Mesh] OR "Arabs"[Mesh] OR "UAE"[Text Word] OR "U.A.E"[Text Word] OR Emirat*[Text Word] OR "United Arab Emirates"[Text Word] OR Qatar*[Text Word] OR Oman*[Text Word] OR (Saudi[Text Word] AND Arabia*[Text Word]) OR Saudi*[Text Word] OR Kuwait*[Text Word] OR Bahrain*[Text Word] OR Yemen*[Text Word] OR Egypt*[Text Word] OR Jordan*[Text Word] OR Leban*[Text Word] OR Syria*[Text Word] OR Iraq*[Text Word] OR "West Bank"[Text Word] OR Gaza*[Text Word] OR Palestin*[Text Word] OR Algeria*[Text Word] OR Libya*[Text Word] OR Morocc*[Text Word] OR Tunis*[Text Word] OR Djibouti*[Text Word] OR Sudan*[Text Word] OR South Sudan*[Text Word] OR Pakistan*[Text Word] OR (North[Text Word] AND Africa*[Text Word]) OR North-Africa*[Text Word] OR ("Africa"[Text Word] AND "Northern"[Text Word]) OR "Northern Africa"[Text Word] OR "East Africa"[Text Word] OR ("Africa"[Text Word] AND "Eastern"[Text Word]) OR "Maghreb"[Text Word] OR "Maghrib"[Text Word] OR Arab*[Text Word] OR Bedouin*[Text Word] OR | Depressio<br>n +<br>Anxiety+<br>Suicide,<br>All<br>MENA<br>With<br>filters:<br>Systemati<br>c Reviews,<br>Meta-<br>Analysis<br>&<br>Reviews;<br>From 2008 | 359         | 7/11/19           |



| "Gulf Cooperation Council"[Text Word] OR "GCC"[Text Word] OR "Middle East"[Text Word]                                                                                                                                                                                                                                                                                                                                                                                                                                                                                                                                                                                                                                                                                                                                                                                                                                                                                                                                                                                                                                                                                                                                                                                                                                                                                                                                                                                                                                                                                                                                                                                                                                                                                                                                                                                                                                                                                                                                                                                                                                                                                                                                                                                                               |                                                                                                                                                                                                                                                                                                    |             |                   |
|-----------------------------------------------------------------------------------------------------------------------------------------------------------------------------------------------------------------------------------------------------------------------------------------------------------------------------------------------------------------------------------------------------------------------------------------------------------------------------------------------------------------------------------------------------------------------------------------------------------------------------------------------------------------------------------------------------------------------------------------------------------------------------------------------------------------------------------------------------------------------------------------------------------------------------------------------------------------------------------------------------------------------------------------------------------------------------------------------------------------------------------------------------------------------------------------------------------------------------------------------------------------------------------------------------------------------------------------------------------------------------------------------------------------------------------------------------------------------------------------------------------------------------------------------------------------------------------------------------------------------------------------------------------------------------------------------------------------------------------------------------------------------------------------------------------------------------------------------------------------------------------------------------------------------------------------------------------------------------------------------------------------------------------------------------------------------------------------------------------------------------------------------------------------------------------------------------------------------------------------------------------------------------------------------------|----------------------------------------------------------------------------------------------------------------------------------------------------------------------------------------------------------------------------------------------------------------------------------------------------|-------------|-------------------|
| Database/ Search strategy<br>Embase                                                                                                                                                                                                                                                                                                                                                                                                                                                                                                                                                                                                                                                                                                                                                                                                                                                                                                                                                                                                                                                                                                                                                                                                                                                                                                                                                                                                                                                                                                                                                                                                                                                                                                                                                                                                                                                                                                                                                                                                                                                                                                                                                                                                                                                                 | Notes                                                                                                                                                                                                                                                                                              | Items found | Date Last Updated |
| <p>(exp depression/ or Depressi*.mp. or bipolar disorder?.mp. or Adjustment Disorder?.mp. or exp adjustment disorder/ or dysphoria.mp. or dysthymia.mp. or melancholia.mp. or mourning syndrome.mp. or Perry syndrome.mp. or pseudodementia.mp. or seasonal affective disorder?.mp. or affective.mp. or exp affective psychosis/ or exp bipolar disorder/ or Melancholi*.mp. or Involutional Psychosis.mp. or Involutional Psychoses.mp. or Involutional Paraphrenia?.mp. or Dysthymi*.mp. or Reactive Disorder?.mp. or Anniversary Reaction?.mp. or Transient Situational Disturbance.mp. or Manic.mp. or Mania?.mp. or Psychotic Mood Disorder?.mp. or exp anxiety disorder/ or anxiety.mp. or exp anxiety/ or Hypervigilance.mp. Or Anxiety Disorder?.mp. Or Nervousness.mp. Or jitteriness.mp. or nervositas.mp. or nervosity.mp. or neurosis.mp. or phobic.mp. or Anxieties.mp. Or Phobia?.mp. Or GAD.mp. Or SAD.mp. Or Panic.mp. Or overanxious disorder.mp. Or OCD.mp. Or obsessi*.mp. Or compulsi*.mp. or fear.mp. or exp suicidal behavior/ or Suicid*.mp. Or Deliberate self harm.mp. Or Deliberate self-harm.mp. Or Parasuicide?.mp. Or DSH.mp. Or Self injurious behavior.mp. Or Self Injurious.mp. Or Self-Injurious.mp. Or Self Injury.mp. Or Self-Injury.mp. Or Self Injuries.mp. or Self-Injuries.mp. or Self-Destructive.mp. or Self Destructive.mp. or Non-Suicidal.mp. or Non Suicidal.mp. or NonSuicidal.mp. or Self-Harm.mp. or Self Harm.mp. or artificial skin lesion.mp. or mutilation,auto.mp. or self inflicted injuries.mp. or self inflicted injury.mp. or self mutilation.mp. or self wounding.mp.) AND (exp Middle East/ or exp North Africa/ or exp Arab/ or exp Djibouti/ or exp Pakistan/ or exp Sudan/ or exp South Sudan/ or Middle East.mp. or North Africa.mp. or EMRO.mp. or Eastern Mediterranean.mp. or Arab.mp. or Arabs.mp. or Arab World.mp. or Algeria*.mp. or Bahrain*.mp. or Djibouti.mp. or Egypt*.mp. or Jordan*.mp. or Kuwait*.mp. or Leban*.mp. or Libya*.mp. or Iraq*.mp. or Morocco*.mp. or Oman*.mp. or Pakistan*.mp. or Qatar*.mp. or Saudi*.mp. or Sudan*.mp. or Syria*.mp. or Tunisia*.mp. or United Arab Emirates.mp. or Emirat*.mp. or West Bank.mp. or Ghaza*.mp. or Gaza*.mp. or Palestin*.mp. or Yemen*.mp. or UAE.mp. or KSA.mp.)</p> | <p>Depressio<br/>n +<br/>Anxiety+<br/>Suicide,<br/>All<br/>MENA<br/>Limiters -<br/>Date<br/>Published:<br/>2008-<br/>current</p> <p>Limited to<br/>evidence-<br/>based<br/>medicine<br/>or meta-<br/>analysis<br/>or<br/>systematic<br/>review,<br/>Human<br/>Exclude<br/>medline<br/>journals</p> | 49          | 7/11/19           |
| Database/ Search Strategy<br>Psycinfo                                                                                                                                                                                                                                                                                                                                                                                                                                                                                                                                                                                                                                                                                                                                                                                                                                                                                                                                                                                                                                                                                                                                                                                                                                                                                                                                                                                                                                                                                                                                                                                                                                                                                                                                                                                                                                                                                                                                                                                                                                                                                                                                                                                                                                                               | Notes                                                                                                                                                                                                                                                                                              | Items found | Date Last Updated |
| <p>(DE "Arabs" OR MA qatar OR bahrain OR oman OR "Saudi arabia" OR saudi OR Kuwait OR Arabia* OR "united arab emirates" OR yemen OR egypt OR jordan OR lebanon OR syria OR Iraq OR algeria OR libya OR morocco OR tunisia OR djibouti OR sudan OR "South sudan" OR pakistan OR "North africa" OR "northern africa" OR "east africa" OR "eastern africa" OR bedouin OR maghreb OR maghrib OR "gulf cooperation council" OR GCC OR SU qatar OR bahrain OR oman OR "Saudi arabia" OR saudi OR Kuwait OR Arabia* OR "united arab emirates" OR yemen OR egypt OR jordan OR lebanon OR syria OR Iraq OR algeria OR libya OR morocco OR tunisia OR djibouti OR sudan OR "South sudan" OR pakistan OR "North africa" OR "northern africa" OR "east africa" OR "eastern africa" OR bedouin OR maghreb OR maghrib OR "gulf cooperation council" OR GCC) OR (TX UAE OR TX U.A.E OR TX Emirat* OR TX United Arab Emirates OR TX Qatar* OR TX Oman* OR TX Saudi Arabia* OR TX Saudi* OR TX Kuwait* OR TX Bahrain* OR TX Yemen* OR TX Egypt* OR TX Jordan* OR TX Leban* OR TX Syria* OR TX Iraq* OR TX West Bank OR TX Gaza* OR TX Palestin* OR TX Algeria* OR TX Libya* OR TX Morocco* OR TX Tunis* OR TX Djibouti* OR TX Sudan*</p>                                                                                                                                                                                                                                                                                                                                                                                                                                                                                                                                                                                                                                                                                                                                                                                                                                                                                                                                                                                                                                                                             | <p>Depressio<br/>n, All<br/>MENA<br/>Limiters -<br/>Date<br/>Published:<br/>20080101-<br/>20191231</p> <p>Narrow<br/>by<br/>Methodol<br/>ogy: -</p>                                                                                                                                                | 330         | 7/8/19            |

|                                                                                                                                                                                                                                                                                                                                                                                                                                                                                                                                                                                                                                                                                                                                                                                                                                                                                                                                                                                                                                                                                                                                                                                                                                                                                                                                                                                                                                                                                                                                                                                                                                                                                                                                                                                                                                                                                                                                                                                                                                                                                                                                                                                                                                                   |                                                                                                                                                                                                  |                           |                                 |
|---------------------------------------------------------------------------------------------------------------------------------------------------------------------------------------------------------------------------------------------------------------------------------------------------------------------------------------------------------------------------------------------------------------------------------------------------------------------------------------------------------------------------------------------------------------------------------------------------------------------------------------------------------------------------------------------------------------------------------------------------------------------------------------------------------------------------------------------------------------------------------------------------------------------------------------------------------------------------------------------------------------------------------------------------------------------------------------------------------------------------------------------------------------------------------------------------------------------------------------------------------------------------------------------------------------------------------------------------------------------------------------------------------------------------------------------------------------------------------------------------------------------------------------------------------------------------------------------------------------------------------------------------------------------------------------------------------------------------------------------------------------------------------------------------------------------------------------------------------------------------------------------------------------------------------------------------------------------------------------------------------------------------------------------------------------------------------------------------------------------------------------------------------------------------------------------------------------------------------------------------|--------------------------------------------------------------------------------------------------------------------------------------------------------------------------------------------------|---------------------------|---------------------------------|
| <p>OR TX South Sudan* OR TX Pakistan* OR TX North Africa* OR TX North-Africa* OR TX "Northern Africa" OR RX "East Africa" OR TX "Eastern Africa" OR TX Maghreb OR TX Maghrib OR TX Arab* OR TX Bedouin* OR TX "Gulf Cooperation Council" OR TX GCC OR TX "Middle East") OR (TX UAE OR TX U.A.E OR TX Emirat* OR TX United Arab Emirates OR TX Qatar* OR TX Oman* OR TX Saudi Arabia* OR TX Saudi* OR TX Kuwait* OR TX Bahrain* OR TX Yemen* OR TX Egypt* OR TX Jordan* OR TX Leban* OR TX Syria* OR TX Iraq* OR TX West Bank OR TX Gaza* OR TX Palestin* OR TX Algeria* OR TX Libya* OR TX Morocco* OR TX Tunis* OR TX Djibouti* OR TX Sudan* OR TX South Sudan* OR TX Pakistan* OR TX North Africa* OR TX North-Africa* OR TX "Northern Africa" OR RX "East Africa" OR TX "Eastern Africa" OR TX Maghreb OR TX Maghrib OR TX Arab* OR TX Bedouin* OR TX "Gulf Cooperation Council" OR TX GCC OR TX "Middle East") AND (DE "Major Depression" OR DE "Anaclitic Depression" OR DE "Dysthymic Disorder" OR DE "Endogenous Depression" OR DE "Late Life Depression" OR DE "Postpartum Depression" OR DE "Reactive Depression" OR DE "Recurrent Depression" OR DE "Treatment Resistant Depression") OR (DE "Depression (Emotion)") OR (DE "Bipolar Disorder" OR DE "Bipolar I Disorder" OR DE "Bipolar II Disorder" OR DE "Cyclothymic Disorder" OR DE "Mania")) OR (DE "Mania" OR DE "Hypomania")) OR (DE "Affective Disorders" OR DE "Disruptive Mood Dysregulation Disorder" OR DE "Major Depression" OR DE "Seasonal Affective Disorder")) OR (DE "Adjustment Disorders") OR DE "Affective Disorders" OR DE "Disruptive Mood Dysregulation Disorder" OR DE "Major Depression" OR DE "Seasonal Affective Disorder" OR TX Depressi* OR Dysthymi* OR Bipolar OR Mani* OR "Seasonal affective disorder" OR Melanchol* OR "Adjustment disorder" OR coping OR cope OR cyclothymi* OR "Internalizing symptom" OR "Internalizing symptoms" OR dysphor* OR "Reactive disorder" OR "Mood dysregulation" OR "mood disorder" OR "mood disorders" OR Affective psychos?s)</p>                                                                                                                                                                                  | <p>meta analysis</p> <p>Narrow by Methodology: - systematic review</p> <p>Narrow by Methodology: - literature review</p> <p>Narrow by Methodology: - metasynteses</p>                            |                           |                                 |
| <p><b>Database/ Search Strategy<br/>Psycinfo</b></p>                                                                                                                                                                                                                                                                                                                                                                                                                                                                                                                                                                                                                                                                                                                                                                                                                                                                                                                                                                                                                                                                                                                                                                                                                                                                                                                                                                                                                                                                                                                                                                                                                                                                                                                                                                                                                                                                                                                                                                                                                                                                                                                                                                                              | <p><b>Notes</b></p>                                                                                                                                                                              | <p><b>Items found</b></p> | <p><b>Date Last Updated</b></p> |
| <p>(DE "Arabs" OR MA qatar OR bahrain OR oman OR "Saudi arabia" OR saudi OR Kuwait OR Arabia* OR "united arab emirates" OR yemen OR egypt OR jordan OR lebanon OR syria OR Iraq OR algeria OR libya OR morocco OR tunisia OR djibouti OR sudan OR "South sudan" OR pakistan OR "North africa" OR "northern africa" OR "east africa" OR "eastern africa" OR bedouin OR maghreb OR maghrib OR "gulf cooperation council" OR GCC OR SU qatar OR bahrain OR oman OR "Saudi arabia" OR saudi OR Kuwait OR Arabia* OR "united arab emirates" OR yemen OR egypt OR jordan OR lebanon OR syria OR Iraq OR algeria OR libya OR morocco OR tunisia OR djibouti OR sudan OR "South sudan" OR pakistan OR "North africa" OR "northern africa" OR "east africa" OR "eastern africa" OR bedouin OR maghreb OR maghrib OR "gulf cooperation council" OR GCC) OR (TX UAE OR TX U.A.E OR TX Emirat* OR TX United Arab Emirates OR TX Qatar* OR TX Oman* OR TX Saudi Arabia* OR TX Saudi* OR TX Kuwait* OR TX Bahrain* OR TX Yemen* OR TX Egypt* OR TX Jordan* OR TX Leban* OR TX Syria* OR TX Iraq* OR TX West Bank OR TX Gaza* OR TX Palestin* OR TX Algeria* OR TX Libya* OR TX Morocco* OR TX Tunis* OR TX Djibouti* OR TX Sudan* OR TX South Sudan* OR TX Pakistan* OR TX North Africa* OR TX North-Africa* OR TX "Northern Africa" OR RX "East Africa" OR TX "Eastern Africa" OR TX Maghreb OR TX Maghrib OR TX Arab* OR TX Bedouin* OR TX "Gulf Cooperation Council" OR TX GCC OR TX "Middle East") OR (TX UAE OR TX U.A.E OR TX Emirat* OR TX United Arab Emirates OR TX Qatar* OR TX Oman* OR TX Saudi Arabia* OR TX Saudi* OR TX Kuwait* OR TX Bahrain* OR TX Yemen* OR TX Egypt* OR TX Jordan* OR TX Leban* OR TX Syria* OR TX Iraq* OR TX West Bank OR TX Gaza* OR TX Palestin* OR TX Algeria* OR TX Libya* OR TX Morocco* OR TX Tunis* OR TX Djibouti* OR TX Sudan* OR TX South Sudan* OR TX Pakistan* OR TX North Africa* OR TX North-Africa* OR TX "Northern Africa" OR RX "East Africa" OR TX "Eastern Africa" OR TX Maghreb OR TX Maghrib OR TX Arab* OR TX Bedouin* OR TX "Gulf Cooperation Council" OR TX GCC OR TX "Middle East") AND (((((((DE "Anxiety" OR DE "Anxiety Sensitivity" OR DE "Computer Anxiety" OR DE "Health Anxiety" OR DE</p> | <p>Anxiety, All MENA Limiters - Date Published: 20080101-20191231</p> <p>Narrow by Methodology: - metasyntesis</p> <p>Narrow by Methodology: - meta analysis</p> <p>Narrow by Methodology: -</p> | <p>313</p>                | <p>7/8/19</p>                   |

|                                                                                                                                                                                                                                                                                                                                                                                                                                                                                                                                                                                                                                                                                                                                                                                                                                                                                                                                                                                                                                                                                                                                                                                                                                                                                                                                                                                                                                                                                                                                                                                                                                                                                                                                                                                                                                                                                                                                                                                                                                                                                                                                                                                                                                                                                                                                                                                                                                                                                                                                                                                                                                                                                                                                  |                                                                                                                                                                                                                                                                        |                           |                                 |
|----------------------------------------------------------------------------------------------------------------------------------------------------------------------------------------------------------------------------------------------------------------------------------------------------------------------------------------------------------------------------------------------------------------------------------------------------------------------------------------------------------------------------------------------------------------------------------------------------------------------------------------------------------------------------------------------------------------------------------------------------------------------------------------------------------------------------------------------------------------------------------------------------------------------------------------------------------------------------------------------------------------------------------------------------------------------------------------------------------------------------------------------------------------------------------------------------------------------------------------------------------------------------------------------------------------------------------------------------------------------------------------------------------------------------------------------------------------------------------------------------------------------------------------------------------------------------------------------------------------------------------------------------------------------------------------------------------------------------------------------------------------------------------------------------------------------------------------------------------------------------------------------------------------------------------------------------------------------------------------------------------------------------------------------------------------------------------------------------------------------------------------------------------------------------------------------------------------------------------------------------------------------------------------------------------------------------------------------------------------------------------------------------------------------------------------------------------------------------------------------------------------------------------------------------------------------------------------------------------------------------------------------------------------------------------------------------------------------------------|------------------------------------------------------------------------------------------------------------------------------------------------------------------------------------------------------------------------------------------------------------------------|---------------------------|---------------------------------|
| <p>"Mathematics Anxiety" OR DE "Performance Anxiety" OR DE "Social Anxiety" OR DE "Speech Anxiety" OR DE "Test Anxiety") OR (DE "Anxiety Disorders" OR DE "Castration Anxiety" OR DE "Death Anxiety" OR DE "Generalized Anxiety Disorder" OR DE "Obsessive Compulsive Disorder" OR DE "Panic Attack" OR DE "Panic Disorder" OR DE "Phobias" OR DE "Separation Anxiety Disorder" OR DE "Trichotillomania")) OR (DE "Anxiety Sensitivity") OR TX Emotion* OR Agitat* OR Fear* OR GAD OR Guilt* OR "Internalizing symptom" OR "Internalizing symptoms" OR internaliz* OR panic OR phobi* OR shame OR angst OR worry OR apprehensi* OR Hypochondria* OR hypervigilan* OR anxiet* OR anxious* OR SAD OR PD OR OAD OR overanxi* OR OCD OR obsessive OR compulsive OR obsession OR compulsion ")</p>                                                                                                                                                                                                                                                                                                                                                                                                                                                                                                                                                                                                                                                                                                                                                                                                                                                                                                                                                                                                                                                                                                                                                                                                                                                                                                                                                                                                                                                                                                                                                                                                                                                                                                                                                                                                                                                                                                                                    | <p>systematic review</p> <p>Narrow by Methodology: - literature review</p>                                                                                                                                                                                             |                           |                                 |
| <p><b>Database/ Search Strategy<br/>Psycinfo</b></p>                                                                                                                                                                                                                                                                                                                                                                                                                                                                                                                                                                                                                                                                                                                                                                                                                                                                                                                                                                                                                                                                                                                                                                                                                                                                                                                                                                                                                                                                                                                                                                                                                                                                                                                                                                                                                                                                                                                                                                                                                                                                                                                                                                                                                                                                                                                                                                                                                                                                                                                                                                                                                                                                             | <p><b>Notes</b></p>                                                                                                                                                                                                                                                    | <p><b>Items found</b></p> | <p><b>Date Last Updated</b></p> |
| <p>(DE "Arabs" OR MA qatar OR bahrain OR oman OR "Saudi arabia" OR saudi OR Kuwait OR Arabia* OR "united arab emirates" OR yemen OR egypt OR jordan OR lebanon OR syria OR Iraq OR algeria OR libya OR morocco OR tunisia OR djibouti OR sudan OR "South sudan" OR pakistan OR "North africa" OR "northern africa" OR "east africa" OR "eastern africa" OR bedouin OR maghreb OR maghrib OR "gulf cooperation council" OR GCC OR SU qatar OR bahrain OR oman OR "Saudi arabia" OR saudi OR Kuwait OR Arabia* OR "united arab emirates" OR yemen OR egypt OR jordan OR lebanon OR syria OR Iraq OR algeria OR libya OR morocco OR tunisia OR djibouti OR sudan OR "South sudan" OR pakistan OR "North africa" OR "northern africa" OR "east africa" OR "eastern africa" OR bedouin OR maghreb OR maghrib OR "gulf cooperation council" OR GCC) OR (TX UAE OR TX U.A.E OR TX Emirat* OR TX United Arab Emirates OR TX Qatar* OR TX Oman* OR TX Saudi Arabia* OR TX Saudi* OR TX Kuwait* OR TX Bahrain* OR TX Yemen* OR TX Egypt* OR TX Jordan* OR TX Leban* OR TX Syria* OR TX Iraq* OR TX West Bank OR TX Gaza* OR TX Palestin* OR TX Algeria* OR TX Libya* OR TX Morocc* OR TX Tunis* OR TX Djibouti* OR TX Sudan* OR TX South Sudan* OR TX Pakistan* OR TX North Africa* OR TX North-Africa* OR TX "Northern Africa" OR RX "East Africa" OR TX "Eastern Africa" OR TX Maghreb OR TX Maghrib OR TX Arab* OR TX Bedouin* OR TX "Gulf Cooperation Council" OR TX GCC OR TX "Middle East") AND (DE "Suicide" OR DE "Attempted Suicide" OR DE "Suicidality" OR DE "Suicidology" OR DE "Self-Poisoning" OR DE "Self-Inflicted Wounds" OR DE suicide ideation DE "Self-Injurious Behavior" OR DE "Head Banging" OR DE "Self-Inflicted Wounds" OR DE "Self-Mutilation" OR DE "Self-Poisoning" OR TX Suicid* OR selfharm OR "self harm" OR self-harm OR "self-harm" OR "self injury" OR self-injury OR "self-injury" OR selfinjury OR "self injurious" OR selfinjurious OR self-injurious OR "self-injurious" OR self-mutilation OR "self-mutilation" OR selfmutilation OR "self mutilation" OR "suicide ideation" OR "Suicide-ideation" OR Suicide-ideation OR Suicideideation OR "suicidal ideation" OR "Suicidal-ideation" OR "suicidalideation" OR Suicidal-ideation OR selfinflicted OR self-inflicted OR "self inflicted" OR "self-inflicted" OR selfdestructive OR self-destructive OR "self destructive" OR "self-destructive" OR "non suicide" OR "non-suicide" OR non-suicide OR nonsuicide OR non-suicidal OR "non-suicidal" OR nonsuicidal OR "non suicidal" OR "suicide ideation" OR "suicidal ideation" OR self-inflicted OR "self-inflicted" OR "self inflicted" OR "self inflict" OR self-inflict OR "self-inflict")</p> | <p>Suicide, All MENA Limiters - Date Published: 20080101 - 20191231</p> <p>Narrow by Methodology: - metasyntesis</p> <p>Narrow by Methodology: - meta analysis</p> <p>Narrow by Methodology: - systematic review</p> <p>Narrow by Methodology: - literature review</p> | <p>59</p>                 | <p>7/9/19</p>                   |
| <p><b>Summary Search</b></p>                                                                                                                                                                                                                                                                                                                                                                                                                                                                                                                                                                                                                                                                                                                                                                                                                                                                                                                                                                                                                                                                                                                                                                                                                                                                                                                                                                                                                                                                                                                                                                                                                                                                                                                                                                                                                                                                                                                                                                                                                                                                                                                                                                                                                                                                                                                                                                                                                                                                                                                                                                                                                                                                                                     |                                                                                                                                                                                                                                                                        | <p><b>1110</b></p>        | <p><b>7/9/19</b></p>            |

**Table 5. Characteristics of included prevalence studies and reported prevalence of perinatal mental illness and suicides in the Middle East and North Africa  
Supplementary material.**

| Systematic Review                             | Primary study             | Sample Size | Country  | Study Population | Specific Health Outcome        | Study Period | Study setting | Sampling method | Study design    | Instrument used/ Suicide data source                                         | Reported Prevalence (%) |
|-----------------------------------------------|---------------------------|-------------|----------|------------------|--------------------------------|--------------|---------------|-----------------|-----------------|------------------------------------------------------------------------------|-------------------------|
| <b>Prevalence of perinatal mental illness</b> |                           |             |          |                  |                                |              |               |                 |                 |                                                                              |                         |
| Afzal and Khalid, 2016 [4]                    | Rasheed, 1988 [5]         | 103         | Pakistan | PP               | Postnatal blues and depression | Unclear      | Unclear       | Unclear         | Cross sectional | Unclear                                                                      | 54.36%                  |
| Afzal and Khalid, 2016 [4]                    | Khalid, 1989 [6]          | Unclear     | Pakistan | PP               | Postnatal blues and depression | Unclear      | Unclear       | Unclear         | Cross sectional | Gordon's maternity blues Questionnaire (1984)<br>Pitt's Questionnaire (1968) | Unclear                 |
| Afzal and Khalid, 2016 [4]                    | Sarwar, 1990 [7]          | 50          | Pakistan | PP               | Depression                     | Unclear      | Unclear       | Unclear         | Longitudinal    | BDI                                                                          | Unclear                 |
| Afzal and Khalid, 2016 [4]                    | Habib, 1997 [8]           | 30          | Pakistan | PP               | Depression                     | Unclear      | Unclear       | Unclear         | Cross sectional | Unclear                                                                      | 20%                     |
| Afzal and Khalid, 2016 [4]                    | Ahmed, 2005 [9]           | 90          | Pakistan | PP               | Depression                     | Unclear      | Hospital      | Convenience     | Cross sectional | EPDS                                                                         | 27%                     |
| Afzal and Khalid, 2016 [4]                    | Muneer, et al., 2009 [10] | 154         | Pakistan | PP               | Depression                     | Unclear      | Unclear       | Unclear         | Cross-sectional | EPDS (Urdu version) & Hamilton rating scale for Depression                   | 33%                     |

|                                       |                                        |      |           |                               |                        |         |                               |                 |                 |                         |                               |
|---------------------------------------|----------------------------------------|------|-----------|-------------------------------|------------------------|---------|-------------------------------|-----------------|-----------------|-------------------------|-------------------------------|
| Afzal and Khalid, 2016 [4]            | Karmaliani, et al., 2009 [12]          | 1368 | Pakistan  | AP: 2 <sup>nd</sup> trimester | Depression and Anxiety | Unclear | Health facility and Community | Non-probability | Cross-sectional | AKUADS>13               | 17.97%                        |
| Afzal and Khalid, 2016 [4]            | Haider, 2010 [13]                      | 213  | Pakistan  | AP                            | Depression             | Unclear | Unclear                       | Unclear         | Cross-sectional | EPDS                    | 42.7%                         |
| Afzal and Khalid, 2016 [4]            | Yasmeen, et al., 2010 [14]             | 100  | Pakistan  | PP                            | Depression             | Unclear | Hospital                      | Unclear         | Cross-sectional | EPDS                    | 41%                           |
| Afzal and Khalid, 2016 [4]            | Shah, et al., 2011 [15]                | 128  | Pakistan  | AP                            | Depression             | Unclear | Unclear                       | Unclear         | Cross-sectional | EPDS                    | 46.8%                         |
| Alhasanat and Fry-McComish, 2015 [16] | Abou-Saleh and Ghubash, 1997 [17]      | 95   | UAE/Dubai | PP- 7 days                    | Depression             | Unclear | Unclear                       | Unclear         | Cross-sectional | EPDS                    | 18%                           |
| Alhasanat and Fry-McComish, 2015 [16] | Agoub, et al., 2005 [22]               | 144  | Morocco   | PP: T1:2 weeks                | Depression             | Unclear | Primary healthcare centres    | Consecutive     | Longitudinal    | MINI, EPDS (>12) DSM IV | T1: 18.7% (MINI) 20.1% (EPDS) |
| Amber Haque, 2015 [18]                | Agoub, Moussaoui and Battas, 2005 [22] | 144  | Morocco   | PP: T2: 6 weeks               | Depression             | Unclear | Primary healthcare centres    | Consecutive     | Longitudinal    | MINI DSM IV             | T2: 6.9%                      |
| Fisher, et al., 2012 [19]             | Agoub, Moussaoui and Battas, 2005 [22] | 144  | Morocco   | PP: T3: 6 months              | Depression             | Unclear | Primary healthcare centres    | Consecutive     | Longitudinal    | MINI DSM IV             | T3: 11.8%                     |
| Sawyer, et al., 2010 [20]             |                                        |      |           |                               |                        |         |                               |                 |                 |                         |                               |

|                                       |                                        |                             |         |                                  |            |         |                               |                        |                            |                          |                        |
|---------------------------------------|----------------------------------------|-----------------------------|---------|----------------------------------|------------|---------|-------------------------------|------------------------|----------------------------|--------------------------|------------------------|
| Shorey, et al., 2018 [21]             | Agoub, Moussaoui and Battas, 2005 [22] | 144                         | Morocco | PP: T4: 9 months                 | Depression | Unclear | Primary healthcare centres    | Consecutive            | Longitudinal               | MINI DSM IV              | T4: 5.6%               |
| Alhasanat and Fry-McComish, 2015 [16] | Al Dallal et al., 2012                 | 237                         | Bahrain | PP: 8 weeks                      | Depression | Unclear | Unclear                       | Simple random sampling | Cross-sectional            | EPDS>12                  | 37.1%                  |
| Alhasanat and Fry-McComish, 2015 [16] | Bener, et al., 2012 [23]               | 1379                        | Qatar   | PP <6 months                     | Depression | Unclear | Unclear                       | Unclear                | Cross-sectional            | EPDS                     | 17.6%                  |
| Alhasanat and Fry-McComish, 2015 [16] | Amber Haque, 2015 [18]                 | 396                         | Lebanon | PP T1: 24 hrs<br>T2: 3-5 months  | Depression | Unclear | Hospitals, Community          | Convenience            | Correlational              | EPDS>=12                 | 21%                    |
| Amber Haque, 2015 [18]                | Chaaya, et al., 2002 [25]              |                             |         |                                  |            |         |                               |                        |                            |                          |                        |
| Alhasanat and Fry-McComish, 2015 [16] | Amber Haque, 2015 [18]                 | T0= 125<br>T1= 86<br>T2= 56 | UAE     | PP: T1: 3 months<br>T2: 6 months | Depression | Unclear | Government maternity hospital | Convenience            | Longitudinal/Correlational | EPDS>=13 Arabic version  | T1: 22.0%<br>T2: 12.5% |
| Alhasanat and Fry-McComish, 2015 [16] | Amber Haque, 2015 [18]                 |                             |         |                                  |            |         |                               |                        |                            | Green, et al., 2006 [26] | EPDS 10-12             |
| Klainin and Arthur, 2009 [24]         | Klainin et al., 2009                   | Klainin and                 |         |                                  |            |         |                               |                        |                            |                          |                        |

|                                                                                                                     |                             |     |         |                                                                                     |            |         |                                  |                                  |              |                                                                                                                                                             |                                             |  |
|---------------------------------------------------------------------------------------------------------------------|-----------------------------|-----|---------|-------------------------------------------------------------------------------------|------------|---------|----------------------------------|----------------------------------|--------------|-------------------------------------------------------------------------------------------------------------------------------------------------------------|---------------------------------------------|--|
| Arthur, 2009 [24]<br>Shorey et al., 2018<br>Shorey, Chee, Ng, Chan, Tam and Chong, 2018 [21]                        |                             |     |         |                                                                                     |            |         |                                  |                                  |              |                                                                                                                                                             |                                             |  |
| Alhasanat and Fry-McComish, 2015 [16]<br>Amber Haque, 2015 [18]<br>Shorey, Chee, Ng, Chan, Tam and Chong, 2018 [21] | Hamdan and Tamim, 2011 [27] | 137 | UAE     | AP :2 <sup>nd</sup> , 3 <sup>rd</sup> trimesters<br>PP T1: 2 months<br>T2: 4 months | Depression | Unclear | Maternal and Child Health Centre | Convenience ; two-stage sampling | Longitudinal | Depressive symptoms- BDI<br>Anxiety Symptoms- BAI<br>Stressful life events Inventory<br>Postpartum Depression -MINI (Diagnosis)<br>-EPDS (>=10) (Screening) | 10.1% (MINI)<br>85.6% (EPDS)                |  |
| Alhasanat and Fry-McComish, 2015 [16]                                                                               | Alami, et al., 2006 [28]    | 100 | Morocco | PP                                                                                  | Depression | Unclear | Unclear                          | Unclear                          | Longitudinal | EPDS, MINI                                                                                                                                                  | 21%, 19.2%                                  |  |
| Alhasanat and Fry-McComish, 2015 [16]                                                                               | Mohammad, et al., 2011 [29] | 353 | Jordan  | AP: 3 <sup>rd</sup> trimester,<br>PP: T1: 6-8 weeks<br>T2: 6 months                 | Depression |         | Hospital and health centres      |                                  | Longitudinal | EPDS<br>MSSS, CWS,<br>DASS-21,<br>PSES<br>PKS                                                                                                               | 19%<br>antenatal,<br>T1: 22.1%<br>T2: 21.2% |  |

|                                                                            |                                   |     |        |                                |            |         |                            |         |                 |                              |                                                                                                 |  |
|----------------------------------------------------------------------------|-----------------------------------|-----|--------|--------------------------------|------------|---------|----------------------------|---------|-----------------|------------------------------|-------------------------------------------------------------------------------------------------|--|
| Amber Haque, 2015 [18]                                                     |                                   |     |        | Age (18-45)                    |            |         |                            |         |                 |                              |                                                                                                 |  |
| Alhasanat and Fry-McComish, 2015 [16]                                      | Saleh el, et al., 2013 [30]       | 120 | Egypt  | PP                             | Depression | Unclear | Unclear                    | Unclear | Cross-sectional | EPDS                         | 17.9%                                                                                           |  |
| Alhasanat and Fry-McComish, 2015 [16]                                      | Yehia, et al., 2013 [31]          | 300 | Jordan | PP                             | Depression | Unclear | Military Hospital          | Unclear | Cross-sectional | EPDS                         | 83% symptoms of Depression<br>39% mild symptoms<br>28% moderate symptoms<br>16% severe symptoms |  |
| Amber Haque, 2015 [18]<br>Shorey, Chee, Ng, Chan, Tam and Chong, 2018 [21] | Al Hinai and Al Hinai, 2014 [32]  | 282 | Oman   | PP: T1: 2 weeks<br>T2: 8 weeks | Depression | Unclear | Hospital and health center | Unclear | Cohort          | EPDS $\geq$ 13<br>EPDS 10-12 | T1: 13.5%<br>T2: 10.6%<br>T1: 15.2%<br>T2: 13.8%                                                |  |
| Amber Haque, 2015 [18]                                                     | Abou-Saleh and Ghubash, 1997 [17] | 95  | UAE    | PP: 2 days, 7 days             | Depression | Unclear | Hospital                   | Unclear | Cross-sectional | SRQ<br>EPDS                  | 24%<br>18%                                                                                      |  |



|                                                                            |                                         |      |              |                                                                                                                                                             |                        |         |                                         |         |                        |                                      |                                          |
|----------------------------------------------------------------------------|-----------------------------------------|------|--------------|-------------------------------------------------------------------------------------------------------------------------------------------------------------|------------------------|---------|-----------------------------------------|---------|------------------------|--------------------------------------|------------------------------------------|
| Amber Haque, 2015 [18]                                                     | Naglaa A. Mohamed and Maklof, 2011 [33] | 110  | Egypt        | PP                                                                                                                                                          | Depression             | Unclear | Hospital                                | Unclear | Cross-sectional        | PDPI, EPDS                           | 51.8%                                    |
| Amber Haque, 2015 [18]                                                     | Bener, Gerber and Sheikh, 2012 [23]     | 2091 | Qatar        | PP: 1 year, 4 months                                                                                                                                        | Depression             | Unclear | Primary health care centres             | Unclear | Cross-sectional        | Interview DASS-21                    | 18.60%                                   |
| Amber Haque, 2015 [18]                                                     | Balaha, et al., 2009 [34]               | 800  | Saudi Arabia | PP: 6 months                                                                                                                                                | Depression             | Unclear | Hospital and Primary healthcare centers | Unclear | Case-control           | MINI-V                               | Young mother 10.1%<br>Older mother 10.3% |
| Amber Haque, 2015 [18]                                                     | Masmoudi, et al., 2008 [35]             | 213  | Tunisia      | T1: first week<br>T2: 6-10 weeks                                                                                                                            | Depression             | Unclear | Hospital                                | Unclear | Longitudinal           | EPDS                                 | T1:19.2%<br>T2:13.2%                     |
| Fisher, Cabral de Mello, Patel, Rahman, Tran, Holton and Holmes, 2012 [19] | Karmaliani, et al., 2006 [36]           | 1000 | Pakistan     | Pregnant women (Civil Hospital) 1000 first recruited women 20-26 weeks pregnant and living locally, identified during routine household visits of 1368/1879 | Depression and anxiety | Unclear | Community                               | Unclear | Cross-sectional survey | AKUADS>31.5<br>How I feel Scale>83.5 | 11.5%<br>13.5%                           |

| in larger study                                                                                                                                                                               |                                         |         |          |                               |            |         |                 |             |                                                       |                                                           |                          |
|-----------------------------------------------------------------------------------------------------------------------------------------------------------------------------------------------|-----------------------------------------|---------|----------|-------------------------------|------------|---------|-----------------|-------------|-------------------------------------------------------|-----------------------------------------------------------|--------------------------|
| Fisher, Cabral de Mello, Patel, Rahman, Tran, Holton and Holmes, 2012 [19]<br>Jones and Coast, 2013 [37]<br>Shorey, Chee, Ng, Chan, Tam and Chong, 2018 [21]<br>Zahidie and Jamali, 2013 [38] | Rahman, et al., 2003 [39]               | 632/701 | Pakistan | AP: 3 <sup>rd</sup> trimester | Depression | Unclear | Rural Community | Consecutive | Two stage cross-sectional survey (Prospective cohort) | Postpartum Depression-SCAN (ICD-10)<br>PIQ<br>LEDS<br>BDQ | 25% (6 weeks antepartum) |
| Fisher, Cabral de Mello, Patel, Rahman, Tran, Holton and Holmes, 2012 [19]<br>Shorey, Chee, Ng, Chan, Tam and                                                                                 | Rahman, Iqbal and Harrington, 2003 [39] | 541/632 | Pakistan | PP: 10-12 weeks               | Depression | Unclear | Rural Community | Consecutive | Two stage cross-sectional survey (Prospective cohort) | Postpartum Depression-SCAN (ICD-10)<br>LEDS<br>PIQ<br>BDQ | 28%                      |

|                                                                                                                                                                                                                                |                             |                                         |          |                                           |            |         |                 |             |                                         |                                                            |                                          |  |  |
|--------------------------------------------------------------------------------------------------------------------------------------------------------------------------------------------------------------------------------|-----------------------------|-----------------------------------------|----------|-------------------------------------------|------------|---------|-----------------|-------------|-----------------------------------------|------------------------------------------------------------|------------------------------------------|--|--|
| Chong, 2018 [21]<br>Zahidie and Jamali, 2013 [38]                                                                                                                                                                              |                             |                                         |          |                                           |            |         |                 |             |                                         |                                                            |                                          |  |  |
| Fisher, Cabral de Mello, Patel, Rahman, Tran, Holton and Holmes, 2012 [19]<br>Jones and Coast, 2013 [37]<br>Klainin and Arthur, 2009 [24]<br>Shorey, Chee, Ng, Chan, Tam and Chong, 2018 [21]<br>Zahidie and Jamali, 2013 [38] | Husain, et al., 2006 [40]   | 149/175<br>T1:175 (antenna)<br>T2: 149  | Pakistan | PP: 12week                                | Depression | Unclear | Rural community | Consecutive | Cross-sectional population-based survey | EPDS>=12<br>Social Support-MSPSS<br>Mental Distress-SRQ-20 | T2: 36% (3 months PP)                    |  |  |
| Jones and Coast, 2013 [37]                                                                                                                                                                                                     | Rahman and Creed, 2007 [41] | T1: 701 (antenna)<br>T2: 632<br>T3: 160 | Pakistan | Followed up women diagnosed with prenatal | Depression | Unclear | Community       | Convenience | Longitudinal                            | Clinical assessment in neuropsychiatry (ICD-10 diagnosis)  | T2: 94% (3 months)<br>T3: 76% (6 months) |  |  |

|                                              |                            |                   |          |                                                                                                                                                                             |            |         |                       |                          |                         |               |        |                                            |
|----------------------------------------------|----------------------------|-------------------|----------|-----------------------------------------------------------------------------------------------------------------------------------------------------------------------------|------------|---------|-----------------------|--------------------------|-------------------------|---------------|--------|--------------------------------------------|
| Klainin and Arthur, 2009 [24]                |                            | T4: 129           |          | depression to one year postpartum. Dependent variable was persistence of depression at 3, 6, 12 months postpartum. 56.6% followed upto 12 months had persistent depression. |            |         |                       |                          |                         |               |        | T4: 62% (12 months)<br>57% All time points |
| Klainin and Arthur, 2009 [24]                | Kalyani, et al., 2001 [42] | T1: 120<br>T2: 76 | Pakistan | PP: T1: 2 weeks<br>T2: 2-4 weeks                                                                                                                                            | Depression | Unclear | Home visit, Community | Convenience              | Prospective comparative | EPDS >10      | 63.3%  |                                            |
| Mahendra n, Puthussery and Amalan, 2019 [11] | Ali, et al., 2012 [43]     | 167               | Pakistan | AP: 1 <sup>st</sup> , 2 <sup>nd</sup> , 3 <sup>rd</sup> trimesters                                                                                                          | Depression | Unclear | Health facility       | Non-probability sampling | Cross-sectional         | HADS score >8 | 16.77% |                                            |
| Mahendra n, Puthussery and Amalan, 2019 [11] | Din, et al., 2016 [44]     | 230               | Pakistan | AP: 3 <sup>rd</sup> trimester                                                                                                                                               | Depression | Unclear | Health facility       | Non-probability sampling | Cross-sectional         | DASS-42>9     | 29.13% |                                            |

|                                              |                                                                                 |      |          |                                                                   |            |         |                                                             |                          |                    |                 |        |
|----------------------------------------------|---------------------------------------------------------------------------------|------|----------|-------------------------------------------------------------------|------------|---------|-------------------------------------------------------------|--------------------------|--------------------|-----------------|--------|
| Mahendra n, Puthuserry and Amalan, 2019 [11] | Fareeha Hamid, 2008 [45]                                                        | 100  | Pakistan | AP: 1 <sup>st</sup> ,2 <sup>nd</sup> , 3 <sup>rd</sup> trimesters | Depression | Unclear | Health facility                                             | Non-probability sampling | Cross-sectional    | HADS score      | 18%    |
| Mahendra n, Puthuserry and Amalan, 2019 [11] | Humayun, et al., 2013 [46]                                                      | 506  | Pakistan | AP: 3 <sup>rd</sup> trimester                                     | Depression | Unclear | Health Facility                                             | Non-probability sampling | Cross-sectional    | (EPDS) score>10 | 75.10% |
| Mahendra n, Puthuserry and Amalan, 2019 [11] | Husain, et al., 2011 [47]                                                       | 1357 | Pakistan | AP: 3 <sup>rd</sup> trimester                                     | Depression | Unclear | Antenatal clinics of Chiniot maternity and childcare centre | Non-probability sampling | Cohort study       | EPDS>12         | 25.79% |
| Zahidie and Jamali, 2013 [38]                | Husain, Parveen, Husain, Saeed, Jafri, Rahman, Tomenson and Chaudhry, 2011 [47] | 149  | Pakistan | PP: 12 weeks                                                      | Depression | Unclear | Maternity and childcare center                              | Unclear                  | Cohort study       | EPDS            | 38.3%  |
| Mahendra n, Puthuserry and Amalan, 2019 [11] | Haider, 2010 [13]                                                               | 213  | Pakistan | AP: 3 <sup>rd</sup> trimester                                     | Depression | Unclear | Health Facility                                             | Non-probability sampling | Prospective cohort | EPDS>12         | 42.72% |

|                                              |                                                        |     |          |                                                                    |            |         |                 |                            |                 |                  |        |
|----------------------------------------------|--------------------------------------------------------|-----|----------|--------------------------------------------------------------------|------------|---------|-----------------|----------------------------|-----------------|------------------|--------|
| Mahendra n, Puthuserry and Amalan, 2019 [11] | Sharifa Mir, 2012 [48]                                 | 328 | Pakistan | AP: 1 <sup>st</sup> ,2 <sup>nd</sup> , 3 <sup>rd</sup> trimesters  | Depression | Unclear | Health Facility | Non-probability sampling   | Cross-sectional | AKUADS score >13 | 33.84% |
| Mahendra n, Puthuserry and Amalan, 2019 [11] | Syeda Rabia, 2017 [49]                                 | 520 | Pakistan | AP: 1 <sup>st</sup> ,2 <sup>nd</sup> , 3 <sup>rd</sup> trimesters  | Depression | Unclear | Health Facility | Non-probability sampling   | Cross-sectional | HADS score >8    | 23.08% |
| Mahendra n, Puthuserry and Amalan, 2019 [11] | Sadaf, 2011 [50]                                       | 150 | Pakistan | AP: 1 <sup>st</sup> ,2 <sup>nd</sup> , 3 <sup>rd</sup> trimesters  | Depression | Unclear | Health Facility | Non-probability sampling   | Cohort          | HAM-D            | 10%    |
| Mahendra n, Puthuserry and Amalan, 2019 [11] | Saeed, et al., 2016 [51]                               | 82  | Pakistan | AP: 1 <sup>st</sup> ,2 <sup>nd</sup> , 3 <sup>rd</sup> trimesters  | Depression | Unclear | Health Facility | Non-probability sampling   | Cohort          | EPDS>9           | 42.68% |
| Mahendra n, Puthuserry and Amalan, 2019 [11] | Shah, Bowen, Afridi, Nowshad and Muhajarine, 2011 [15] | 128 | Pakistan | AP: 1 <sup>st</sup> ,2 <sup>nd</sup> , 3 <sup>rd</sup> trimesters  | Depression | Unclear | Health Facility | Stratified Random sampling | Cross-sectional | EPDS>13          | 46.88% |
| Mahendra n, Puthuserry and                   | Waqas, et al., 2015 [52]                               | 500 | Pakistan | A P: 1 <sup>st</sup> ,2 <sup>nd</sup> , 3 <sup>rd</sup> trimesters | Depression | Unclear | Health Facility | Non-probability sampling   | Cross-sectional | HADS>11          | 31.8%  |

|                                                                              |                                     |                                |          |                                                                                              |            |         |                               |                          |                                                                                                              |                                    |                                        |  |
|------------------------------------------------------------------------------|-------------------------------------|--------------------------------|----------|----------------------------------------------------------------------------------------------|------------|---------|-------------------------------|--------------------------|--------------------------------------------------------------------------------------------------------------|------------------------------------|----------------------------------------|--|
| Amalan, 2019 [11]                                                            |                                     |                                |          |                                                                                              |            |         |                               |                          |                                                                                                              |                                    |                                        |  |
| Mahendran, Puthussery and Amalan, 2019 [11]<br>Zahidie and Jamali, 2013 [38] | Zahidie, et al., 2011 [53]          | 375                            | Pakistan | AP: 2 <sup>nd</sup> trimester                                                                | Depression | Unclear | Health Facility and community | Non-probability sampling | Mixed method study. Qualitative phase I: indepth interviews<br>Quantitative phase II: cross-sectional survey | CES-D>16                           | 61.07%                                 |  |
| Sawyer, Ayers and Smith, 2010 [20]                                           | Alami, Kadri and Berrada, 2006 [28] | 100                            | Morocco  | AP:1 <sup>st</sup> trimester<br>AP:2 <sup>nd</sup> trimester<br>AP:3 <sup>rd</sup> trimester | Depression | Unclear | Unclear                       | Unclear                  | Longitudinal                                                                                                 | MINI (DSM-IV)                      | 17.4%<br>16%<br>15.7%                  |  |
| Sawyer, Ayers and Smith, 2010 [20]                                           | Alami, Kadri and Berrada, 2006 [28] | 100                            | Morocco  | PP: 2-3 weeks<br>12 weeks<br>24 weeks<br>36 weeks                                            | Depression | Unclear | Unclear                       | Unclear                  | Longitudinal                                                                                                 | MINI (DSM-IV)                      | 16.8%<br>14%<br>12%<br>6%              |  |
| Shorey, Chee, Ng, Chan, Tam and Chong, 2018 [21]                             | Khalifa, et al., 2015 [54]          | 238                            | Sudan    | PP: 3 months                                                                                 | Depression | Unclear | Community                     | Convenience              | Cross-sectional population-based survey                                                                      | EPDS (>=12) Arabic version<br>MINI | 9.2% (EPDS; n=238)<br>45% (MINI; n=40) |  |
| Stewart, 2007 [55]                                                           | Rahman, et al., 2004 [56]           | 265<br>Case-129<br>Control-136 | Pakistan | AP: 3 <sup>rd</sup> trimester                                                                | Depression | Unclear | Rural community based         | Unclear                  | Cohort                                                                                                       | SCAN                               | 25%                                    |  |

|                                                |                                                                                                             |                                  |          |                               |                        |                                     |                                    |             |                             |                                                    |                                                                  |
|------------------------------------------------|-------------------------------------------------------------------------------------------------------------|----------------------------------|----------|-------------------------------|------------------------|-------------------------------------|------------------------------------|-------------|-----------------------------|----------------------------------------------------|------------------------------------------------------------------|
| Stewart, 2007 [55]                             | Rahman, et al., 2004 [57]                                                                                   | 172<br>Case-83<br>Control<br>-89 | Pakistan | PP                            | Depression             | Unclear                             | Urban<br>Immunisation<br>Clinic    | Unclear     | Case-control                | Self-reporting<br>questionnaire<br>(cut-off 11/12) | 41%<br>57% cases<br>25%<br>controls                              |
| Zahidie<br>and Jamali,<br>2013 [38]            | Ali, et al.,<br>2009 [58]                                                                                   | Unclear                          | Pakistan | PP: 1,2,6<br>and 12<br>months | Depression             | Unclear                             | Urban<br>communities<br>of Karachi | Unclear     | Longitudinal                | AKUADS,<br>Unclear DSM<br>IV                       | 28.8%                                                            |
| Zahidie<br>and Jamali,<br>2013 [38]            | Asad, et al.,<br>2010 [59]                                                                                  | 1369                             | Pakistan | AP                            | Depression/<br>Anxiety | Unclear                             | Primary<br>care health<br>centres  | Unclear     | Cross<br>sectional<br>study | AKUADS                                             | 18%                                                              |
| Zahidie<br>and Jamali,<br>2013 [38]            | Asad,<br>Karmaliani,<br>Sullaiman,<br>Bann,<br>McClure,<br>Pasha,<br>Wright and<br>Goldenberg,<br>2010 [59] | 1369                             | Pakistan | AP                            | Considered<br>Suicide  | Unclear                             | Primary<br>care health<br>centres  | Unclear     | Cross<br>sectional<br>study | AKUADS                                             | Prevalence<br>- 11%                                              |
| Zahidie<br>and Jamali,<br>2013 [38]            | Asad,<br>Karmaliani,<br>Sullaiman,<br>Bann,<br>McClure,<br>Pasha,<br>Wright and<br>Goldenberg,<br>2010 [59] | 148                              | Pakistan | AP                            | Attempted<br>Suicide   | Unclear                             | Primary<br>care health<br>centres  | Unclear     | Cross<br>sectional<br>study | AKUADS                                             | Prevalence<br>- 45%                                              |
| Additional<br>primary<br>studies<br>identified | Gulamani, et<br>al., 2013 [60]                                                                              | 214<br>34<br>preterm<br>mothers  | Pakistan | PP: 4-6<br>weeks              | Depression             | 1 May<br>2010 to<br>30 June<br>2010 | Unclear                            | Consecutive | Cohort study                | EPDS<br>PBQ<br>PSS                                 | 35.3%<br>(Preterm<br>infants)<br>15.3%<br>(Full-term<br>infants) |



|                                |                           |              |                                                                     |                                        |                                                                                |                                     |                      |         |                               |                                                                                      |                                                                     |
|--------------------------------|---------------------------|--------------|---------------------------------------------------------------------|----------------------------------------|--------------------------------------------------------------------------------|-------------------------------------|----------------------|---------|-------------------------------|--------------------------------------------------------------------------------------|---------------------------------------------------------------------|
|                                |                           |              | 170<br>full-<br>term<br>mother<br>s                                 |                                        |                                                                                |                                     |                      |         |                               |                                                                                      |                                                                     |
| Husain, et al., 2014 [61]      | 1357                      | Pakistan     | AP: 3 <sup>rd</sup> trimester                                       | Depression                             | March 2004 to April 2005                                                       | Maternity home and childcare center | Consecutive          | Cohort  | PIQ EPDS- Urdu version SRQ-20 | EPDS $\geq$ 12 (13.4%)<br>SRQ score of 7 (28.5%)                                     |                                                                     |
| Kazi, et al., 2006 [62]        | 292                       | Pakistan     | AP: 1 <sup>st</sup> , 2 <sup>nd</sup> and 3 <sup>rd</sup> trimester | Depression                             | Phase 1: July 2003 to May 2004<br>Phase 2: June 2004 to September 2004         | Hospital                            | Unclear              | Unclear | CES-D cut off $\geq$ 16       | 39.4%                                                                                |                                                                     |
|                                | 571                       |              |                                                                     |                                        |                                                                                |                                     |                      |         |                               | 14%                                                                                  |                                                                     |
| Al-Modayfer, et al., 2015 [63] |                           | Saudi Arabia | PP: 5 weeks after delivery                                          | Depression                             | Unclear                                                                        | Community                           | Unclear              | Unclear | EPDS                          |                                                                                      |                                                                     |
| <b>Suicide data</b>            |                           |              |                                                                     |                                        |                                                                                |                                     |                      |         |                               |                                                                                      |                                                                     |
| Fuhr, et al., 2014 [64]        | Farhat, et al., 2012 [65] | 469          | Tunisia                                                             | 15-49years; Maternal deaths population | Proportion of pregnancy-related deaths/maternal deaths attributable to suicide | 1999-2007                           | Hospitals, community | Unclear | Population-based              | Modified RAMOS [Reproductive Age Mortality Study] (private and public hospital data) | Proportion of pregnancy-related deaths/maternal deaths attributable |

|                                                      |                           |     |        |                                       |                                                                        |           |                      |         |                  |                                                                           |                                                                                                                                                                                                                                                                                                                                    |                    |
|------------------------------------------------------|---------------------------|-----|--------|---------------------------------------|------------------------------------------------------------------------|-----------|----------------------|---------|------------------|---------------------------------------------------------------------------|------------------------------------------------------------------------------------------------------------------------------------------------------------------------------------------------------------------------------------------------------------------------------------------------------------------------------------|--------------------|
|                                                      |                           |     |        |                                       |                                                                        |           |                      |         |                  |                                                                           | only) to identify deaths. Private hospital data refers to the year 2006 only. Ascertainment of cause of death assignment: Review of hospital records and CEMD (Confidential Enquiries into Maternal Deaths) questionnaire s by regional advisory board (composed of specialists in obstetrics and a national committee on maternal | e to suicides 0.64 |
| Fuhr, Calvert, Ronsmans, Chandra, Sikander, De Silva | Amarin, et al., 2010 [66] | 112 | Jordan | 15-49 years; Pregnancy related deaths | Proportion of pregnancy-related deaths/maternal deaths attributable to | 2007-2008 | Hospitals, Community | Unclear | Population-based | Reproductive Age Mortality Study (data from the Ministry of Health, civil | Proportion of pregnancy related deaths/maternal                                                                                                                                                                                                                                                                                    |                    |

|                                                                           |                            |     |          |                                                                                          |                                                                                                      |           |                      |         |                  |                                                                                                                                                                                                                           |                                                                                         |
|---------------------------------------------------------------------------|----------------------------|-----|----------|------------------------------------------------------------------------------------------|------------------------------------------------------------------------------------------------------|-----------|----------------------|---------|------------------|---------------------------------------------------------------------------------------------------------------------------------------------------------------------------------------------------------------------------|-----------------------------------------------------------------------------------------|
| and Patel, 2014 [64]                                                      |                            |     |          |                                                                                          | domestic violence and suicide                                                                        |           |                      |         |                  | registry, police units, forensic departments, records from the United Nations Relief and Works Agency)<br>Cause of death: Relatives of women who died were contacted by phone to obtain information on the cause of death | deaths attributable to suicides<br>6.25                                                 |
| Fuhr, Calvert, Ronsmans, Chandra, Sikander, De Silva and Patel, 2014 [64] | Jafarey, et al., 2009 [67] | 128 | Pakistan | 15-49 years; "Pregnancy-related deaths (retrospective) and pregnant women (prospective)" | Proportion of pregnancy-related deaths/maternal deaths attributable to domestic violence and suicide | 2005-2007 | Hospitals, community | Unclear | Population-based | Deaths were identified through monthly reports of lady health workers, health management information systems, records of hospitals, graveyards, and union information                                                     | Proportion of pregnancy-related deaths/maternal deaths attributable to suicides<br>3.12 |

|                                                      |                                                                        |     |       |                                       |                                                        |      |                      |         |                  |                                                                |                                                                                                                                                                                  |  |
|------------------------------------------------------|------------------------------------------------------------------------|-----|-------|---------------------------------------|--------------------------------------------------------|------|----------------------|---------|------------------|----------------------------------------------------------------|----------------------------------------------------------------------------------------------------------------------------------------------------------------------------------|--|
|                                                      |                                                                        |     |       |                                       |                                                        |      |                      |         |                  |                                                                | systems, records of hospitals, graveyards, and union councils in addition to a survey with complete population coverage                                                          |  |
|                                                      |                                                                        |     |       |                                       |                                                        |      |                      |         |                  |                                                                | Cause of deaths: Verbal autopsy (reviewed by three physicians and the principal investigator of study in case of disagreement) , consensus panel disagreement) , consensus panel |  |
| Fuhr, Calvert, Ronsmans, Chandra, Sikander, De Silva | Ministry of Health and Population, Egypt 2001<br>Population, 2001 [68] | 634 | Egypt | 15-49 years; Pregnancy related deaths | Proportion of pregnancy-related deaths/maternal deaths | 2000 | Hospitals, Community | Unclear | Population based | Vital routine registration data from a selection of 149 health | Proportion of pregnancy-related deaths/maternal                                                                                                                                  |  |

|                         |                            |                                                                                                                                                                                                                                                       |                                              |
|-------------------------|----------------------------|-------------------------------------------------------------------------------------------------------------------------------------------------------------------------------------------------------------------------------------------------------|----------------------------------------------|
| and Patel,<br>2014 [64] | attributable to<br>suicide | bureaus in all<br>governorates.<br>Deaths were<br>identified by<br>using<br>data from a<br>screening<br>questionnaire<br>at the health<br>bureaus,<br>medical<br>records, drug<br>prescriptions,<br>records from<br>hospitals and<br>private clinics. | deaths<br>attributable<br>to suicide<br>5.84 |
|                         |                            | Cause of<br>deaths:<br>Verbal<br>autopsy<br>(cause of<br>death<br>data reviewed<br>by a local<br>advisory<br>group),<br>consensus<br>panel                                                                                                            |                                              |

Edinburgh Postnatal Depression Scale (EPDS); Schedules for Assessment in Neuropsychiatry (SCAN); Aga Khan University Anxiety Depression Scale (AKUADS); The Centre for Epidemiology Studies-Depression (CES-D) scale; Hospital anxiety Depression Scale (HADS); Personal Information Questionnaire (PIQ); Life events and difficulties Schedule (LEDS) Brief disability Questionnaire (BDQ); Multidimensional Scale of Perceived Social Support (MSPSS); Parental Bonding questionnaire (PBQ); Parental Stress Scale (PSS) Mini- International Neuropsychiatric Interview (MINI) . \*cut off scores provided when available from the Systematic reviews AP- Antepartum PP- Postpartum T- Time frame

**Table S6. Characteristics of studies reporting risk factors of perinatal mental health illness in the Middle East and North Africa**

| Systematic Review Citation | Included Study Citation                         | Sample Size | Country  | Study Popl | Specific Health Outcome | Study Period | Study setting | Sampling method | Study design    | Instrument used/ data source                           | Risk factors                                                                                                                                                                                                                                                                                                                 |
|----------------------------|-------------------------------------------------|-------------|----------|------------|-------------------------|--------------|---------------|-----------------|-----------------|--------------------------------------------------------|------------------------------------------------------------------------------------------------------------------------------------------------------------------------------------------------------------------------------------------------------------------------------------------------------------------------------|
| Afzal and Khalid, 2016 [4] | Afzal and Khalid, 2014 [69]                     | 106         | Pakistan | PP         | Depression              | Unclear      | Unclear       | Unclear         | Correlational   | DSS<br>Social support demographic Performance          | Social support has significant negative relationship                                                                                                                                                                                                                                                                         |
| Afzal and Khalid, 2016 [4] | Gul, et al., 2013 [70]                          | 500         | Pakistan | PP         | Depression              | Unclear      | Unclear       | Unclear         | Cohort study    | Demographic questionnaire<br>SSDS<br>EPDS<br>DSM-IV-TR | Female gender of the newborn in the fourth pregnancy                                                                                                                                                                                                                                                                         |
| Afzal and Khalid, 2016 [4] | Haider, 2010 [13]                               | 213         | Pakistan | AP, PP     | Depression              | Unclear      | Unclear       | Unclear         | Cross sectional | EPDS                                                   | Marital Issues<br>Conflict with parents and parents-in-law<br>History of domestic violence<br>Psychiatric history<br>Obstetric risk factors including previous miscarriages, problematic pregnancies<br>Mothers with antenatal depression had more complicated deliveries and babies with lower birthweight and APGAR scores |
| Afzal and Khalid, 2016 [4] | Kalyani, Saeed, Rehman and Mubbashar, 2001 [42] | 120         | Pakistan | PP         | Perinatal depression    | Unclear      | Unclear       | Unclear         | Cross sectional | Unclear                                                | Unwanted pregnancy<br>Parity (Premiparae)<br>Living in extended family<br>Interpersonal marital difficulties<br>Early loss of mother<br>Lower level of education found to have association with PND                                                                                                                          |
| Afzal and Khalid, 2016 [4] | Karmaliani, Asad, Bann, Moss,                   | 1368        | Pakistan | AP, PP     | Depression and Anxiety  | Unclear      | Unclear       | Unclear         | Cross sectional | AKUADS                                                 | Husband's unemployment (p=0.032)                                                                                                                                                                                                                                                                                             |

|                            |                                                                   |     |          |                                |            |         |         |         |                                               |                                                          |                                                                                                                                                                   |                                                                                                                                                                                                                                                     |
|----------------------------|-------------------------------------------------------------------|-----|----------|--------------------------------|------------|---------|---------|---------|-----------------------------------------------|----------------------------------------------------------|-------------------------------------------------------------------------------------------------------------------------------------------------------------------|-----------------------------------------------------------------------------------------------------------------------------------------------------------------------------------------------------------------------------------------------------|
|                            | McClure, Pasha, Wright and Goldenberg, 2009 [12]                  |     |          |                                |            |         |         |         |                                               |                                                          |                                                                                                                                                                   | Poor socioeconomic status (p= 0.027)<br>Education<br>First child (p= 0.002)<br>Unwanted pregnancy (p< 0.001)<br>Abuse (physical, verbal and sexual- strongest association)<br>42% history of physical and sexual abuse; 23% history of verbal abuse |
| Afzal and Khalid, 2016 [4] | Munaf, 2006 [71]                                                  | 50  | Pakistan | PP                             | Depression | Unclear | Unclear | Unclear | Cross sectional                               | BDI                                                      | Nuclear family                                                                                                                                                    |                                                                                                                                                                                                                                                     |
| Afzal and Khalid, 2016 [4] | Muneer, Minhas, Tamiz-ud-Din Nizami, Mujeeb and Usmani, 2009 [10] | 154 | Pakistan | PP                             | Depression | Unclear | Unclear | Unclear | Descriptive and cross sectional               | EPDS (Urdu version) Hamilton rating scale for Depression | Lower Socioeconomic status<br>Low levels of education<br>Small families<br>Married with three kids<br>Married less than five years<br>Living in extended families |                                                                                                                                                                                                                                                     |
| Afzal and Khalid, 2016 [4] | Ghazala Sadiq, 2015 [72]                                          | 380 | Pakistan | Elderly Professional women, PP | Depression | Unclear | Unclear | Unclear | Observational, case-control and Retrospective | EPDS                                                     | Elderly and working women<br>Joint family system has negative relationship                                                                                        |                                                                                                                                                                                                                                                     |
| Afzal and Khalid, 2016 [4] | Sarwar, 1990 [7]                                                  | 50  | Pakistan | PP, AP                         | Depression | Unclear | Unclear | Unclear | Longitudinal                                  | BDI                                                      | Prenatal depression was a significant risk factor for postnatal depression                                                                                        |                                                                                                                                                                                                                                                     |
| Afzal and Khalid, 2016 [4] | Shah, Bowen, Afridi, Nowshad and Muhajarine, 2011 [15]            | 354 | Pakistan | AP                             | Depression | Unclear | Unclear | Unclear | Cross sectional                               | EPDS                                                     | Physical abuse                                                                                                                                                    |                                                                                                                                                                                                                                                     |

|                                       |                                                                     |                             |               |                                   |            |         |           |                        |                                   |          |                                                                                                                                                                                  |
|---------------------------------------|---------------------------------------------------------------------|-----------------------------|---------------|-----------------------------------|------------|---------|-----------|------------------------|-----------------------------------|----------|----------------------------------------------------------------------------------------------------------------------------------------------------------------------------------|
| Afzal and Khalid, 2016 [4]            | Yasmeen, Tayyaba, Chatan, Naeem, Numan and Adnan Maqsood, 2010 [14] | 100                         | Pakistan      | PP                                | Depression | Unclear | Hospitals | Unclear                | Descriptive and Cross-sectional   | EPDS     | Previous PND<br>Marital dissatisfaction<br>Joint family system<br>Physical abuse<br>Poor socioeconomic status<br>Non-working status                                              |
| Alhasanat and Fry-McComish, 2015 [16] | Abou-Saleh and Ghubash, 1997 [17]                                   | 95                          | UAE/<br>Dubai | PP: 7 days                        | Depression | Unclear | Unclear   | Unclear                | Cross-sectional                   | EPDS     | Marital problems<br>Lack of assistance from husband<br>Stressful life events                                                                                                     |
| Alhasanat and Fry-McComish, 2015 [16] | Agoub, Moussaoui and Battas, 2005 [22]                              | 144                         | Morocco       | PP: 2 and 6 weeks, 6 and 9 months | Depression | Unclear | Unclear   | Unclear                | Longitudinal                      | DSM IV   | Poor marital relationship and lack of partner support<br>Intimate partner violence<br>Pregnancy complication<br>Stressful life events during pregnancy<br>Baby's health problems |
| Alhasanat and Fry-McComish, 2015 [16] | Al Dallal and Grant, 2012 [73]                                      | 237                         | Bahraini      | PP                                | Depression | Unclear | Unclear   | Simple random sampling | Cross-sectional                   | EPDS>12  | History of depressive symptoms or antenatal depression<br>Perceived lack of partner support                                                                                      |
| Alhasanat and Fry-McComish, 2015 [16] | Bener, et al., 2012 [74]                                            | 1379                        | Qatar         | PP <6 months                      | Depression | Unclear | Unclear   | Unclear                | Prospective cross-sectional study | EPDS     | Age older than 35<br>Low education<br>Housewives<br>Low income                                                                                                                   |
| Alhasanat and Fry-McComish, 2015 [16] | Chaaya, Campbell, El Kak, Shaar, Harb and Kaddour, 2002 [25]        | 396                         | Lebanon       | PP T1: 24 hrs T2: 3-5 months      | Depression | Unclear | Unclear   | Unclear                | Longitudinal                      | EPDS>=12 | Lack of Social support<br>Antenatal depression<br>Stressful life events<br>Lower educational level                                                                               |
| Alhasanat and Fry-                    | Green, Broome and                                                   | T0= 125<br>T1= 86<br>T2= 56 | UAE           | PP: T1: 3 months                  | Depression | Unclear | Unclear   | Unclear                | Longitudinal,                     | EPDS     | Non-breastfeeding<br>First child<br>Poor body image                                                                                                                              |



|                                       |                                                        |     |         |                                                                                          |            |         |                   |         |                               |              |  |                                                                                                                                                                                                          |
|---------------------------------------|--------------------------------------------------------|-----|---------|------------------------------------------------------------------------------------------|------------|---------|-------------------|---------|-------------------------------|--------------|--|----------------------------------------------------------------------------------------------------------------------------------------------------------------------------------------------------------|
| McComish, 2015 [16]                   | Mirabella, 2006 [26]                                   |     |         | T2: 6 months                                                                             |            |         |                   |         |                               |              |  | Poor relationship with mother in law<br>Older age of marriage                                                                                                                                            |
| Alhasanat and Fry-McComish, 2015 [16] | Hamdan and Tamim, 2011 [27]                            | 137 | UAE     | PP                                                                                       | Depression | Unclear | Unclear           | Unclear | Prospective longitudinal      | EPDS         |  | Antenatal depression (depression during both second and third trimesters)<br>Number of children<br>Religion<br>Use of formula and lack of breast feeding<br>Education of mother<br>Stressful life events |
| Alhasanat and Fry-McComish, 2015 [16] | Alami, Kadri and Berrada, 2006 [28]                    | 100 | Morocco | PP                                                                                       | Depression | Unclear | Unclear           | Unclear | Longitudinal                  | EPDS<br>MINI |  | Baby's health problems<br>Stressful life events<br>Marital problems                                                                                                                                      |
| Alhasanat and Fry-McComish, 2015 [16] | Mohammad, Gamble and Creedy, 2011 [29]                 | 353 | Jordan  | AP: 3 <sup>rd</sup> trimester,<br>PP: T1: 6-8 weeks<br>T2: 6 months<br>Age (18-45) years | Depression | Unclear | Unclear           | Unclear | Prospective                   | EPDS         |  | Antenatal depression<br>Difficult relationship with mother in law<br>Stress<br>Social support<br>Perceived low parenting knowledge (self-efficacy)                                                       |
| Alhasanat and Fry-McComish, 2015 [16] | Saleh el, El-Bahei, Del El-Hadidy and Zayed, 2013 [30] | 120 | Egypt   | PP                                                                                       | Depression | Unclear | Unclear           | Unclear | Comparative descriptive study | EPDS         |  | Social support<br>Socioeconomic status<br>Non-breast feeding<br>Prior psychiatric problems                                                                                                               |
| Alhasanat and Fry-McComish, 2015 [16] | Yehia, Callister and Hamdan-Mansour, 2013 [31]         | 300 | Jordan  | PP                                                                                       | Depression | Unclear | Military Hospital | Unclear | Cross-sectional               | EPDS         |  | Income<br>Intent to become pregnant<br>Birth mode<br>Family social support                                                                                                                               |

|                        |                                                              |      |         |                           |            |         |                             |         |                    |                      |                                                                                                                                                                                                                                                                                                          |
|------------------------|--------------------------------------------------------------|------|---------|---------------------------|------------|---------|-----------------------------|---------|--------------------|----------------------|----------------------------------------------------------------------------------------------------------------------------------------------------------------------------------------------------------------------------------------------------------------------------------------------------------|
| Amber Haque, 2015 [18] | Abou-Saleh and Ghubash, 1997 [17]                            | 95   | UAE     | PP: 2 days, 7 days        | Depression | Unclear | Hospital                    | Unclear | Cross-sectional    | SRQ<br>EPDS          | <ul style="list-style-type: none"> <li>Previous psychiatric problems</li> <li>Marital difficulties</li> <li>Stressful life events</li> <li>Lack of emotional support</li> <li>Polygamy</li> <li>Death of one's father before the age of 13</li> <li>Having a relative with an alcohol problem</li> </ul> |
| Amber Haque, 2015 [18] | Al Hinai and Al Hinai, 2014 [32]                             | 282  | Oman    | PP: 2, 8 weeks            | Depression | Unclear | Hospital and health center  | Unclear | Prospective cohort | EPDS                 | <ul style="list-style-type: none"> <li>Younger age</li> <li>Conflict with family members</li> <li>Sickness of family member</li> <li>Work difficulties</li> </ul>                                                                                                                                        |
| Amber Haque, 2015 [18] | Chaaya, Campbell, El Kak, Shaar, Harb and Kaddour, 2002 [25] | 396  | Lebanon | PP: 24 hrs and 3-5 months | Depression | Unclear | Hospitals                   | Unclear | Longitudinal       | EPDS                 | <ul style="list-style-type: none"> <li>Prenatal depression</li> <li>Lack of social support</li> <li>Stressful life events</li> <li>Lifetime depression</li> <li>Vaginal delivery</li> <li>Little education</li> <li>Unemployment</li> <li>Chronic health problems</li> </ul>                             |
| Amber Haque, 2015 [18] | Naglaa A. Mohamed and Maklof, 2011 [33]                      | 110  | Egypt   | PP                        | Depression | Unclear | Hospital                    | Unclear | Cross-sectional    | PDPI<br>EPDS         | <ul style="list-style-type: none"> <li>Low level of socioeconomic status</li> <li>Feelings of depression and anxiety during pregnancy</li> <li>History of depression</li> <li>Lack of social support</li> <li>Low self-esteem</li> <li>Stressful life events</li> </ul>                                  |
| Amber Haque, 2015 [18] | Bener, Gerber and Sheikh, 2012 [23]                          | 2091 | Qatar   | PP: 1 year, 4 months      | Depression | Unclear | Primary health care centres | Unclear | Cross-sectional    | Interview<br>DASS-21 | <ul style="list-style-type: none"> <li>Under 30 years old</li> <li>Higher education level</li> <li>Lower household income</li> <li>Unplanned pregnancy</li> <li>Lack of family support</li> <li>Mothers as housewives</li> </ul>                                                                         |

|                        |                                                                          |     |              |                                                                          |            |         |                                         |             |                          |                                               |  |                                                                                                                                                                            |
|------------------------|--------------------------------------------------------------------------|-----|--------------|--------------------------------------------------------------------------|------------|---------|-----------------------------------------|-------------|--------------------------|-----------------------------------------------|--|----------------------------------------------------------------------------------------------------------------------------------------------------------------------------|
|                        |                                                                          |     |              |                                                                          |            |         |                                         |             |                          |                                               |  | Poor relationship with the mother-in-law                                                                                                                                   |
| Amber Haque, 2015 [18] | Balaha, Amr, El-Gilany and Sheikh, 2009 [34]                             | 800 | Saudi Arabia | PP: 6 months                                                             | Depression | Unclear | Hospital and Primary healthcare centers | Unclear     | Case-control             | MINI-V                                        |  | Comorbid psychiatric disorders in 15% of cases                                                                                                                             |
| Amber Haque, 2015 [18] | Green, Broome and Mirabella, 2006 [26]                                   | 125 | UAE          | PP: 3, 6 months                                                          | Depression | Unclear | Government maternity hospital           | Unclear     | Longitudinal,            | EPDS                                          |  | Not breast feeding<br>Giving birth to the first child<br>Poor self-body image and view of weight<br>Poor relationship with mother-in-law<br>Older age at marriage          |
| Amber Haque, 2015 [18] | Hamdan and Tamim, 2011 [27]                                              | 137 | UAE          | PP: 2, 4 months                                                          | Depression | Unclear | Maternal and child health centre        | Unclear     | Prospective longitudinal | EPDS<br>MINI                                  |  | Depression during pregnancy in both second and third trimesters<br>Number of children<br>Religion<br>Not breast feeding                                                    |
| Amber Haque, 2015 [18] | Masmoudi, Tabelsi, Charfeddine, Ben Ayed, Guermazzi and Jaoua, 2008 [35] | 213 | Tunisia      | T1: first week<br>T2: 6-10 weeks                                         | Depression | Unclear | Hospital                                | Unclear     | Longitudinal             | EPDS                                          |  | High rate of PPD in the first stage would be contaminated by an intense postpartum blues                                                                                   |
| Amber Haque, 2015 [18] | Mohammad, Gamble and Creedy, 2011 [29]                                   | 353 | Jordan       | AP: 3 <sup>rd</sup> trimester,<br>PP: 6-8 weeks, 6 months<br>Age (18-45) | Depression | Unclear | Hospital and health centres             | Unclear     | Cross sectional          | EPDS<br>MSSS<br>CWS<br>DASS-21<br>PSES<br>PKS |  | Stress<br>Anxiety<br>Financial problems<br>Perceived lack of parenting skills<br>Difficult relationship with the mother-in-law<br>Unplanned pregnancy<br>Low self-efficacy |
| Fisher, Cabral de      | Agoub, Moussaoui                                                         | 144 | Morocco      | PP: 9 months                                                             | Depression | Unclear | Primary maternity                       | consecutive | Prospective cohort       | MINI                                          |  | Socioeconomic disadvantage                                                                                                                                                 |

|                                                                            |                                                                           |      |          |                                                                                                     |                        |         |                       |               |                                         |                                      |  |  |                                                                                                                                                                                                                                                                                              |
|----------------------------------------------------------------------------|---------------------------------------------------------------------------|------|----------|-----------------------------------------------------------------------------------------------------|------------------------|---------|-----------------------|---------------|-----------------------------------------|--------------------------------------|--|--|----------------------------------------------------------------------------------------------------------------------------------------------------------------------------------------------------------------------------------------------------------------------------------------------|
| Mello, Patel, Rahman, Tran, Holton and Holmes, 2012 [19]                   | and Battas, 2005 [22]                                                     |      |          |                                                                                                     |                        |         | healthcare centres    |               |                                         |                                      |  |  | Min OR (95% CI) 2.1 (95% CI: 1.3-5.2)<br>Max OR (95% CI) 13.2 (95% CI: 5.2-33.5)<br>An unemployed partner<br>Infant is ill<br>Min OR (95% CI) 1.1 (95% CI: 0.6-2.3)<br>Max OR (95% CI) 4.5 (95% CI: 3.2-6.4)                                                                                 |
| Fisher, Cabral de Mello, Patel, Rahman, Tran, Holton and Holmes, 2012 [19] | Husain, Bevc, Husain, Chaudhry, Atif and Rahman, 2006 [40]                | 149  | Pakistan | PP: 12week                                                                                          | Depression             | Unclear | Rural community based | Consecutively | Cross-sectional population-based survey | EPDS>=11                             |  |  | Quality of relationship with intimate partner<br>Difficulties in intimate partner relationship<br>Min OR (95% CI) 1.96 (95% CI: 1.0-3.9)<br>Max OR (95% CI) 9.44 (95% CI: 2.4-37.8)<br>Physical violence<br>Min OR (95% CI) 2.11 (95% CI: 1.1-4.0)<br>Max OR (95% CI) 6.75 (95% CI: 2.1-2.0) |
| Fisher, Cabral de Mello, Patel, Rahman, Tran, Holton and Holmes, 2012 [19] | Karmaliani, Bann, Mahmood, Harris, Akhtar, Goldenberg and Moss, 2006 [36] | 1000 | Pakistan | Pregnant women (Civil Hospital) 1000 first recruited women 20-26 weeks pregnant and living locally, | Depression and Anxiety | Unclear | Civil hospital        | Unclear       | Cross-sectional survey                  | AKUADS>13.5<br>How I feel Scale>83.5 |  |  | Unclear                                                                                                                                                                                                                                                                                      |



|                                                                                              |                                    |     |        |                                                                                                                                   |                                 |         |        |                                               |         |                                                                                                    |                                                                                                                                                                                                                                                                                                                                                                                                   |
|----------------------------------------------------------------------------------------------|------------------------------------|-----|--------|-----------------------------------------------------------------------------------------------------------------------------------|---------------------------------|---------|--------|-----------------------------------------------|---------|----------------------------------------------------------------------------------------------------|---------------------------------------------------------------------------------------------------------------------------------------------------------------------------------------------------------------------------------------------------------------------------------------------------------------------------------------------------------------------------------------------------|
|                                                                                              |                                    |     |        |                                                                                                                                   |                                 |         |        |                                               |         |                                                                                                    | <p>Min OR (95% CI) 2.10 (95% CI: 1.2-3.8)</p> <p>Max OR (95% CI) 4.3 (95% CI: 1.4-13.3)</p> <p>Having at least three children</p> <p>Min OR (95% CI) 2.6 (95% CI: 1.1-6.3)</p> <p>Max OR (95% CI) 4.1 (95% CI: 0.9-19.0)</p> <p>Infant characteristics</p> <p>Not having a child or the desired sex</p> <p>Min OR (95% CI) 1.8 (95% CI: 1.4-2.3)</p> <p>Max OR (95% CI) 2.6 (95% CI: 1.2-6.5)</p> |
| James-Hawkins, et al., 2019 [75]                                                             | Abdelhai and Mosleh, 2015 [76]     | 376 | Egypt  | AP: 1 <sup>st</sup> , 2 <sup>nd</sup> , 3 <sup>rd</sup> trimester (1 <sup>st</sup> , 2 <sup>nd</sup> , 3 <sup>rd</sup> trimester) | Prenatal depression and anxiety | Unclear | Clinic | Systematic sampling (probability sample)      | Unclear | HADS Perceived financial distress on a 5-point Likert scale (ref= no perceived financial distress) | Experiencing anxiety and depression vs. neither<br>No association between financial distress & depression / anxiety (Multivariate, logistic regression);<br>Ua OR = 1.59, p=0.15                                                                                                                                                                                                                  |
| James-Hawkins, Shaltout, Nur, Nasrallah, Qutteina, Abdul Rahim, Hennink and Yount, 2019 [75] | Abuidhail and Abujilban, 2014 [77] | 218 | Jordan | P: 3 <sup>rd</sup> trimester                                                                                                      | Depression                      | Unclear | Clinic | Convenience sampling (non-probability sample) | Unclear | EPDS                                                                                               | Low vs high education (ref)<br>Positive association between education and prenatal depression (bivariate, means comparison);<br>t=5.10, p=0.00                                                                                                                                                                                                                                                    |

|                                                                                              |                                        |     |         |                                          |            |         |                            |                                               |                                  |                   |                                                                                                                                                                                                                                                                                                             |
|----------------------------------------------------------------------------------------------|----------------------------------------|-----|---------|------------------------------------------|------------|---------|----------------------------|-----------------------------------------------|----------------------------------|-------------------|-------------------------------------------------------------------------------------------------------------------------------------------------------------------------------------------------------------------------------------------------------------------------------------------------------------|
| James-Hawkins, Shaltout, Nur, Nasrallah, Qutteina, Abdul Rahim, Hennink and Yount, 2019 [75] | Abujilban, et al., 2014 [78]           | 218 | Jordan  | AP:<br>Literate women in third trimester | Depression | Unclear | Clinic                     | Convenience sampling (non-probability sample) | Observational<br>Cross sectional | EPDS              | Elementary to MA<br>Negative association between education and prenatal depression (Multivariate, regression); B=-2.2, p<0.05                                                                                                                                                                               |
| James-Hawkins, Shaltout, Nur, Nasrallah, Qutteina, Abdul Rahim, Hennink and Yount, 2019 [75] | Agoub, Moussaoui and Battas, 2005 [22] | 144 | Morocco | PP: 2 and 6 weeks, 6 and 9 months        | Depression | Unclear | Primary healthcare centres | consecutive                                   | Longitudinal                     | MINI case vs. not | Literate vs. illiterate (ref)<br>No association between education and postnatal depression (Bivariate, means comparison); p=0.83<br>Working vs not (ref)<br>No association between employment and postnatal depression (Bivariate, means comparison); p=1.0                                                 |
| James-Hawkins, Shaltout, Nur, Nasrallah, Qutteina, Abdul Rahim, Hennink and Yount, 2019 [75] | Al-Azri, et al., 2016 [79]             | 959 | Oman    | AP:<br>1st,2nd,3rd trimesters            | Depression | Unclear | Clinic based               | Systematic sampling (probability sample)      | Unclear                          | EPDS              | Secondary or less vs. university (ref)<br>No association between education and prenatal depression (Bivariate, chi square); p=0.13<br>Housewife vs. employed (ref)<br>No association between employment and prenatal depression (Bivariate, chi square); p=0.39<br>< 500 vs. 500-1000 vs. >1000 Omani Riyal |

|                                                                                              |                                   |     |              |                                |            |         |                            |                                               |                               |         |  |  |                                                                                                                                                                                                                                                                                                 |
|----------------------------------------------------------------------------------------------|-----------------------------------|-----|--------------|--------------------------------|------------|---------|----------------------------|-----------------------------------------------|-------------------------------|---------|--|--|-------------------------------------------------------------------------------------------------------------------------------------------------------------------------------------------------------------------------------------------------------------------------------------------------|
|                                                                                              |                                   |     |              |                                |            |         |                            |                                               |                               |         |  |  | No association between financial resource and prenatal depression (Bivariate, chi square); p=0.08                                                                                                                                                                                               |
| James-Hawkins, Shaltout, Nur, Nasrallah, Qutteina, Abdul Rahim, Hennink and Yount, 2019 [75] | Al Dallal and Grant, 2012 [73]    | 237 | Bahrain      | PP: 8 weeks                    | Depression | Unclear | Clinic based               | Simple random sampling                        | Observational Cross-sectional | EPDS>12 |  |  | <p>≥ Secondary vs. &lt; secondary (ref)</p> <p>No association between education and postnatal depression (Bivariate, means comparison); p=0.13</p> <p>Not working vs. working (ref)</p> <p>No association between employment and postnatal depression (Bivariate, means comparison); p=0.18</p> |
| James-Hawkins, Shaltout, Nur, Nasrallah, Qutteina, Abdul Rahim, Hennink and Yount, 2019 [75] | Alharbi and Abdulghani, 2014 [80] | 352 | Saudi Arabia | PP                             | Depression | Unclear | Clinic based               | Convenience sampling (non-probability sample) | Unclear                       | EPDS    |  |  | <p>≥ Secondary vs. &lt; secondary (ref)</p> <p>No association between education and postnatal depression (Bivariate, chi square); p=0.79</p> <p>Work or school vs. housewife(ref)</p> <p>No association between employment and postnatal depression (Bivariate, chi square), p=0.19</p>         |
| James-Hawkins, Shaltout, Nur, Nasrallah, Qutteina, Abdul Rahim, Hennink                      | Al Hinai and Al Hinai, 2014 [32]  | 282 | Oman         | PP: T1: 2 weeks<br>T2: 8 weeks | Depression | Unclear | Hospital and health center | Unclear                                       | Prospective cohort            | EPDS    |  |  | <p>Work difficulties vs. none (ref) (among working women)</p> <p>No association between work difficulties and post-natal depression</p>                                                                                                                                                         |



|                                                                                              |                                              |      |       |    |                                           |         |        |                                          |                                          |         |                                                                                                                                                                                                                                                                                                                                                                                                                                                                     |  |
|----------------------------------------------------------------------------------------------|----------------------------------------------|------|-------|----|-------------------------------------------|---------|--------|------------------------------------------|------------------------------------------|---------|---------------------------------------------------------------------------------------------------------------------------------------------------------------------------------------------------------------------------------------------------------------------------------------------------------------------------------------------------------------------------------------------------------------------------------------------------------------------|--|
| and Yount, 2019 [75]                                                                         |                                              |      |       |    |                                           |         |        |                                          |                                          |         |                                                                                                                                                                                                                                                                                                                                                                                                                                                                     |  |
| James-Hawkins, Shaltout, Nur, Nasrallah, Qutteina, Abdul Rahim, Hennink and Yount, 2019 [75] | Bener, 2013 [81]                             | 1659 | Qatar | PP | Post-natal depression, anxiety and stress | Unclear | Clinic | Unclear                                  | Systematic sampling (probability sample) | DASS-21 | ≥ Secondary vs. < secondary (ref)<br>Negative association between education and postnatal depression (Bivariate, means comparison); p=0.01                                                                                                                                                                                                                                                                                                                          |  |
| James-Hawkins, Shaltout, Nur, Nasrallah, Qutteina, Abdul Rahim, Hennink and Yount, 2019 [75] | Bener, Burgut, Ghuloum and Sheikh, 2012 [74] | 1379 | Qatar | PP | Postnatal depression, anxiety and stress  | Unclear | Clinic | Random sampling                          | Prospective cross sectional              | EPDS    | ≥ Secondary vs. < secondary (ref)<br>Negative association between education and postnatal depression (Bivariate, means comparison); p=0.00<br>Not working vs. Working(ref)<br>No association between employment and postnatal depression (Bivariate, means comparison); p=0.12<br>Difficulty managing income vs. not (ref)<br>Positive association between financial difficulties and postnatal depression (Multivariate, logistic regression); aOR = 2.37, p<0.001 |  |
| James-Hawkins, Shaltout, Nur, Nasrallah, Qutteina,                                           | Bener, Gerber and Sheikh, 2012 [23]          | 1659 | Qatar | PP | Postnatal stress                          | Unclear | Clinic | Systematic sampling (probability sample) | Unclear                                  | DASS-21 | < Secondary vs. ≥ secondary (ref)<br>Positive association between education and postnatal stress (Multivariate, logistic regression); aOR = 1.50, p=0.04                                                                                                                                                                                                                                                                                                            |  |

|                                                                                                                             |                                                                             |      |         |                                       |            |         |                         |                                                            |                              |  |      |                                                                                                                                                                                                                                                                                                                                                                                                |                                                                                                                                                                                                                                                                                     |
|-----------------------------------------------------------------------------------------------------------------------------|-----------------------------------------------------------------------------|------|---------|---------------------------------------|------------|---------|-------------------------|------------------------------------------------------------|------------------------------|--|------|------------------------------------------------------------------------------------------------------------------------------------------------------------------------------------------------------------------------------------------------------------------------------------------------------------------------------------------------------------------------------------------------|-------------------------------------------------------------------------------------------------------------------------------------------------------------------------------------------------------------------------------------------------------------------------------------|
| Abdul<br>Rahim,<br>Hennink<br>and Yount,<br>2019 [75]                                                                       |                                                                             |      |         |                                       |            |         |                         |                                                            |                              |  |      |                                                                                                                                                                                                                                                                                                                                                                                                | Positive association between education and postnatal depression (Multivariate, logistic regression); aOR = 1.50, p=0.01<br>Not working vs. working (ref)<br>Negative association between employment and postnatal depression (Multivariate, logistic regression); aOR = 1.6, p=0.00 |
| James-<br>Hawkins,<br>Shaltout,<br>Nur,<br>Nasrallah,<br>Qutteina,<br>Abdul<br>Rahim,<br>Hennink<br>and Yount,<br>2019 [75] | Burgut, et<br>al., 2013 [82]                                                | 1379 | Qatar   | PP                                    | Depression | Unclear | Clinic                  | Convenience<br>sampling<br>(non-<br>probability<br>sample) | Unclear                      |  | EPDS | < Secondary vs. ≥ secondary (ref)<br>No association between education and postnatal depression (Multivariate, logistic regression); Qatari: aOR = 1.62, p=0.08; Arab non-Qatari: aOR = 0.78, p=0.32<br>Working vs. not (ref)<br>No association between employment and postnatal depression (Multivariate, logistic regression); Qatari: aOR = 1.78, p=n.s.; Arab non-Qatari: aOR = 0.13, p=n.s |                                                                                                                                                                                                                                                                                     |
| James-<br>Hawkins,<br>Shaltout,<br>Nur,<br>Nasrallah,<br>Qutteina,<br>Abdul<br>Rahim,<br>Hennink<br>and Yount,<br>2019 [75] | Chaaya,<br>Campbell, El<br>Kak, Shaar,<br>Harb and<br>Kaddour,<br>2002 [25] | 396  | Lebanon | PP T1:<br>24 hrs T2:<br>3-5<br>months | Depression | Unclear | Hospitals,<br>Community | Convenience                                                | Prospective<br>correlational |  | EPDS | Low and high vs. medium (ref)<br>No association between education and postnatal depression (Multivariate, logistic regression) low: OR = 1.12, p=0.77; high: OR = 1.98, p=0.20<br>Working vs. not (ref)<br>No association between employment and postnatal depression (Multivariate, logistic regression); UaOR = 0.74, p=0.60                                                                 |                                                                                                                                                                                                                                                                                     |

|                                                                                              |                                        |                             |         |                                                                                    |            |         |                                  |                                               |                                         |                                                                                                    |                                                                                                                                                                                                                                                                           |
|----------------------------------------------------------------------------------------------|----------------------------------------|-----------------------------|---------|------------------------------------------------------------------------------------|------------|---------|----------------------------------|-----------------------------------------------|-----------------------------------------|----------------------------------------------------------------------------------------------------|---------------------------------------------------------------------------------------------------------------------------------------------------------------------------------------------------------------------------------------------------------------------------|
| James-Hawkins, Shaltout, Nur, Nasrallah, Qutteina, Abdul Rahim, Hennink and Yount, 2019 [75] | El-Khoury, et al., 1999 [83]           | 150                         | Lebanon | PP                                                                                 | Depression | Unclear | Clinic                           | Convenience sampling (non-probability sample) | Unclear                                 | DDI                                                                                                | ≥ Secondary vs. < secondary (ref)<br>No association between education and postnatal depression (Bivariate, means comparison);<br>p=0.67                                                                                                                                   |
| James-Hawkins, Shaltout, Nur, Nasrallah, Qutteina, Abdul Rahim, Hennink and Yount, 2019 [75] | Green, Broome and Mirabella, 2006 [26] | T0= 125<br>T1= 86<br>T2= 56 | UAE     | PP: T1: 3 months<br>T2: 6 months                                                   | Depression | Unclear | Government maternity hospital    | Convenience                                   | Longitudinal, Prospective correlational | EPDS                                                                                               | Working vs not (ref)<br>No association between employment and postnatal depression (Bivariate, means comparison); p>0.05                                                                                                                                                  |
| James-Hawkins, Shaltout, Nur, Nasrallah, Qutteina, Abdul Rahim, Hennink and Yount, 2019 [75] | Hamdan and Tamim, 2011 [27]            | 137                         | UAE     | AP:2 <sup>nd</sup> , 3 <sup>rd</sup> trimesters<br>PP T1: 2 months<br>T2: 4 months | Depression | Unclear | Maternal and Child Health Centre | Convenience; two-stage sampling               | Prospective longitudinal                | Depressive symptoms-BDI<br>Anxiety Symptoms-BAI<br>Stressful life events Inventory<br>MINI<br>EPDS | > Secondary vs. ≤ secondary (ref)<br>Negative association between education and postnatal depression (Bivariate, means comparison);<br>p=0.04<br>Working vs not (ref)<br>No association between employment and postnatal depression (Bivariate, means comparison); p=0.34 |
| James-Hawkins, Shaltout,                                                                     | Khabour, et al., 2013 [84]             | 370                         | Jordan  | PP                                                                                 | Depression | Unclear | Clinic                           | Stratified Sampling                           | Unclear                                 |                                                                                                    | ≥ Secondary vs. < secondary (ref)<br>No association between education and postnatal depression                                                                                                                                                                            |

|                                                                                              |                             |     |         |                                                                    |            |         |        |                                               |                      |      |                                                                                                                                                                          |                                                                                                                                                                                                                                                                                                                                                        |
|----------------------------------------------------------------------------------------------|-----------------------------|-----|---------|--------------------------------------------------------------------|------------|---------|--------|-----------------------------------------------|----------------------|------|--------------------------------------------------------------------------------------------------------------------------------------------------------------------------|--------------------------------------------------------------------------------------------------------------------------------------------------------------------------------------------------------------------------------------------------------------------------------------------------------------------------------------------------------|
| Nur, Nasrallah, Qutteina, Abdul Rahim, Hennink and Yount, 2019 [75]                          |                             |     |         |                                                                    |            |         |        |                                               | (probability sample) |      |                                                                                                                                                                          | (Bivariate, means comparison); p=0.32<br>≥ Secondary vs. < secondary (ref)<br>No association between education and postnatal depression (Bivariate, means comparison); p=0.32<br>Not satisfied with income vs. satisfied (ref)<br>Positive association between satisfaction with income and postnatal depression (Bivariate, means comparison); p=0.03 |
| James-Hawkins, Shaltout, Nur, Nasrallah, Qutteina, Abdul Rahim, Hennink and Yount, 2019 [75] | Lteif, et al., 2005 [85]    | 79  | Lebanon | AP: 1 <sup>st</sup> , 2 <sup>nd</sup> , 3 <sup>rd</sup> trimesters | Depression | Unclear | Clinic | Convenience sampling (non-probability sample) | Unclear              | BDI  | Problems at work vs. Not (ref)<br>Positive association between problems at work and prenatal depression (Bivariate, logistic regression); UaOR=55.8, p=0.001             |                                                                                                                                                                                                                                                                                                                                                        |
| James-Hawkins, Shaltout, Nur, Nasrallah, Qutteina, Abdul Rahim, Hennink and Yount, 2019 [75] | Masmoudi, et al., 2014 [86] | 302 | Tunisia | PP                                                                 | Depression | Unclear | Clinic | Convenience sampling (non-probability sample) | Unclear              | EPDS | < Secondary vs. ≥ secondary (ref)<br>Positive association between education and postnatal depression (Bivariate, means comparison); p = 0.30 (PPD); p<0.01 (intense PPD) |                                                                                                                                                                                                                                                                                                                                                        |

|                                                                                              |                                                                          |     |         |    |            |         |        |                                               |         |      |                                                                                                                                                                                                                                                                          |
|----------------------------------------------------------------------------------------------|--------------------------------------------------------------------------|-----|---------|----|------------|---------|--------|-----------------------------------------------|---------|------|--------------------------------------------------------------------------------------------------------------------------------------------------------------------------------------------------------------------------------------------------------------------------|
| James-Hawkins, Shaltout, Nur, Nasrallah, Qutteina, Abdul Rahim, Hennink and Yount, 2019 [75] | Masmoudi, et al., 2010 [87]                                              | 213 | Tunisia | PP | Depression | Unclear | Clinic | Convenience sampling (non-probability sample) | Unclear | EPDS | Primary, secondary, post-secondary literate vs. illiterate (ref)<br>Negative association between education and postnatal depression (Bivariate, chi square); p = 0.03                                                                                                    |
| James-Hawkins, Shaltout, Nur, Nasrallah, Qutteina, Abdul Rahim, Hennink and Yount, 2019 [75] | Masmoudi, Tabelsi, Charfeddine, Ben Ayed, Guermazzi and Jaoua, 2008 [35] | 213 | Tunisia | PP | Depression | Unclear | Clinic | Convenience sampling (non-probability sample) | Unclear | EPDS | ≥ Secondary vs. < secondary (ref)<br>No association between education and postnatal depression (Bivariate, means comparison); p = 0.76                                                                                                                                   |
| James-Hawkins, Shaltout, Nur, Nasrallah, Qutteina, Abdul Rahim, Hennink and Yount, 2019 [75] | Alami, Kadri and Berrada, 2006 [28]                                      | 100 | Morocco | AP | Depression | Unclear | Clinic | Convenience sampling (non-probability sample) | Unclear | MINI | Illiterate vs. literate (ref)<br>No association between education and prenatal depression (Bivariate, logistic regression); p=0.93<br>Not working vs working (ref)<br>No association between employment and prenatal depression (Bivariate, logistic regression); p=0.68 |

|                                                                                              |                                                |     |         |    |            |         |        |                                               |         |      |                                                                                                                                                                                                                                                                                                                                                                                                                  |
|----------------------------------------------------------------------------------------------|------------------------------------------------|-----|---------|----|------------|---------|--------|-----------------------------------------------|---------|------|------------------------------------------------------------------------------------------------------------------------------------------------------------------------------------------------------------------------------------------------------------------------------------------------------------------------------------------------------------------------------------------------------------------|
| James-Hawkins, Shaltout, Nur, Nasrallah, Qutteina, Abdul Rahim, Hennink and Yount, 2019 [75] | Alami, Kadri and Berrada, 2006 [28]            | 100 | Morocco | PP | Depression | Unclear | Clinic | Convenience sampling (non-probability sample) | Unclear | MINI | Illiterate vs. literate (ref)<br>No association between education and perinatal depression (Bivariate, means comparison); p=0.90<br>Working vs. not (ref.)<br>No association between employment and perinatal depression (Bivariate, means comparison); p=0.20<br>Financial distress vs. none (ref.)<br>No association between financial distress and perinatal depression (Bivariate, means comparison); p=0.50 |
| James-Hawkins, Shaltout, Nur, Nasrallah, Qutteina, Abdul Rahim, Hennink and Yount, 2019 [75] | Mohammad, Gamble and Creedy, 2011 [29]         | 353 | Jordan  | AP | Depression | Unclear | Clinic | Convenience sampling (non-probability sample) | Unclear | EPDS | Worry about financial problems<br>Positive association between financial problems and prenatal depression (Multivariate, regression); B=0.08, p=0.01                                                                                                                                                                                                                                                             |
| James-Hawkins, Shaltout, Nur, Nasrallah, Qutteina, Abdul Rahim, Hennink                      | Yehia, Callister and Hamdan-Mansour, 2013 [31] | 300 | Jordan  | PP | Depression | Unclear | Clinic | Convenience sampling (non-probability sample) | Unclear | EPDS | Monthly income<br>Negative association between financial distress and postnatal depression (Multivariate, regression); B=-0.54, p=0.03                                                                                                                                                                                                                                                                           |









|                                                                                    |                                                                    |                   |          |                                                                   |                                 |         |                       |                                               |                               |          |  |                                                                                                                                                                                                                                                                                                                          |
|------------------------------------------------------------------------------------|--------------------------------------------------------------------|-------------------|----------|-------------------------------------------------------------------|---------------------------------|---------|-----------------------|-----------------------------------------------|-------------------------------|----------|--|--------------------------------------------------------------------------------------------------------------------------------------------------------------------------------------------------------------------------------------------------------------------------------------------------------------------------|
|                                                                                    |                                                                    |                   |          |                                                                   |                                 |         |                       |                                               |                               |          |  | subordinate to male relatives; however, they receive the recognition of honour and substantial social support during a 40-day postpartum period                                                                                                                                                                          |
| Klainin and Arthur, 2009 [24]                                                      | Kalyani, Saeed, Rehman and Mubbashar, 2001 [42]                    | T1: 120<br>T2: 76 | Pakistan | PP: T1: 2 weeks<br>T2: 2-4 weeks                                  | Depression                      | Unclear | Home visit, Community | Convenience                                   | Prospective comparative       | EPDS >10 |  | Unwanted pregnancy<br>Parity (Premiparae)<br>Living with extended family<br>Marital difficulties<br>Early loss of mother                                                                                                                                                                                                 |
| Qutteina, et al., 2018 [89]                                                        | Abdelhai and Mosleh, 2015 [76]                                     | 376               | Egypt    | AP: 1 <sup>st</sup> , 2 <sup>nd</sup> , 3 <sup>rd</sup> trimester | Prenatal depression and anxiety | Unclear | Clinic                | Systematic sampling (probability sample)      | observational Cross-sectional | Unclear  |  | Spouse domestic violence is an independent predictor of prenatal depression and anxiety combined (OR = 3.27 p = 0.013; Binary logistic regression)<br>Problematic familial relationships are not significant predictors of prenatal depression and anxiety combined (OR = 2.02 p = 0.08; Binary logistic regression)     |
| Qutteina, Nasrallah, James-Hawkins, Nur, Yount, Hennink and Abdul Rahim, 2018 [89] | Abujilban, Abuidhail, Al-Modallal, Hamaideh and Mosemli, 2014 [78] | 218               | Jordan   | AP                                                                | Depression                      | Unclear | Clinic                | Convenience sampling (non-probability sample) | Observational Cross-sectional | DUCOS    |  | Family and Nonfamily stressful relationships are significant predictors of prenatal depression (B = 0.08 p < 0.01 B = 0.08 p < 0.01; Multiple regression).<br>Social support from family and non-family resources was not associated with decreased prenatal depression (B = not reported p > 0.05; Multiple regression) |
| Qutteina, Nasrallah, James-Hawkins, Nur, Yount,                                    | Abou-Saleh and Ghubash, 1997 [17]                                  | 90                | UAE      | PP                                                                | Depression                      | Unclear | Unclear               | Census of setting                             | Observational Prospective     | Unclear  |  | Marital problems before birth (Yes: 5 case, 2 non case<br>No: 10 case, 69 non case; p = 0.001) and ongoing (Yes: 5 case, 9 non case No: 10 case, 63 non case p = 0.05; Bivariate, contingency tables)                                                                                                                    |

|                                                                                    |                                                       |     |              |                                   |            |         |                            |             |              |                               |      |         |                                                                                                                                                                                                                                                                                                                                                       |
|------------------------------------------------------------------------------------|-------------------------------------------------------|-----|--------------|-----------------------------------|------------|---------|----------------------------|-------------|--------------|-------------------------------|------|---------|-------------------------------------------------------------------------------------------------------------------------------------------------------------------------------------------------------------------------------------------------------------------------------------------------------------------------------------------------------|
| Hennink and Abdul Rahim, 2018 [89]                                                 |                                                       |     |              |                                   |            |         |                            |             |              |                               |      |         | are significantly positively associated with PPD.<br>Decreased family support (Staying with women's family (not in-laws)) is a significant predictor of PPD ( $p < 0.001$ ; DFA (Discriminant Function Analysis))<br>Husband assistance is significantly inversely associated with PPD (Yes: 9 case, 55 non case No: 7 case, 18 non case $p = 0.05$ ) |
| Qutteina, Nasrallah, James-Hawkins, Nur, Yount, Hennink and Abdul Rahim, 2018 [89] | Agoub, Moussaoui and Battas, 2005 [22]                | 144 | Morocco      | PP: 2 and 6 weeks, 6 and 9 months | Depression | Unclear | Primary healthcare centres | Consecutive | Longitudinal |                               | MINI |         | Poor marital relationship is significantly associated with PPD (33.3% case, 13.6% non - case $p = 0.02$ ; Bivariate, ANOVA)                                                                                                                                                                                                                           |
| Qutteina, Nasrallah, James-Hawkins, Nur, Yount, Hennink and Abdul Rahim, 2018 [89] | Alasoom and Koura, 2014 [90]                          | 450 | Saudi Arabia | PP                                | Depression | Unclear | Clinic/Hospital            | Census      |              | Observational cross-sectional |      | Unclear | Non-supportive husband is a significant independent predictor of PPD (OR 2.493; $p = 0.011$ ; Stepwise logistic regression)<br>Poor support from relatives (Non-supportive relatives) is not a significant predictor of PPD (OR = not reported $p > 0.005$ ; Stepwise logistic regression)                                                            |
| Qutteina, Nasrallah, James-Hawkins, Nur,                                           | Al-Azri, Al-Lawati, Al-Kamyani, Al-Kiyumi, Al-Rawahi, | 959 | Oman         | AP                                | Depression | Unclear | Clinic                     | Unclear     |              | Observational cross-sectional |      | Unclear | Marital conflict is a significant predictor of prenatal depression (OR = 13.83 $p = 0.000$ ; Multivariate logistic regression)                                                                                                                                                                                                                        |

|                                                                                    |                                     |     |         |                                                   |            |         |                            |                        |                                         |                        |  |                                                                                                                                                                                                                                                                                                                                                           |
|------------------------------------------------------------------------------------|-------------------------------------|-----|---------|---------------------------------------------------|------------|---------|----------------------------|------------------------|-----------------------------------------|------------------------|--|-----------------------------------------------------------------------------------------------------------------------------------------------------------------------------------------------------------------------------------------------------------------------------------------------------------------------------------------------------------|
| Yount, Hennink and Abdul Rahim, 2018 [89]                                          | Davidson and Al-Maniri, 2016 [79]   |     |         |                                                   |            |         |                            |                        |                                         |                        |  |                                                                                                                                                                                                                                                                                                                                                           |
| Qutteina, Nasrallah, James-Hawkins, Nur, Yount, Hennink and Abdul Rahim, 2018 [89] | Al Dallal and Grant, 2012 [73]      | 237 | Bahrain | PP: 8 weeks                                       | Depression | Unclear | Clinic based               | Simple random sampling | Observational Cross-sectional           | EPDS>12                |  | Non-supportive husband is a significant predictor of PPD (OR 2.41 p = 0.01; Multivariate logistic regression)<br>Less help provided by mother is not significantly associated with PPD (OR = 1.33 p = 0.292; Bivariate, Chi-square)<br>Less satisfaction with help at home is significantly associated with increased PPD (OR = 2.00 p = 0.04; Bivariate) |
| Qutteina, Nasrallah, James-Hawkins, Nur, Yount, Hennink and Abdul Rahim, 2018 [89] | Al Hinai and Al Hinai, 2014 [32]    | 282 | Oman    | PP: T1: 2 weeks<br>T2: 8 weeks                    | Depression | Unclear | Hospital and health center | Unclear                | Prospective cohort                      | EPDS>=13<br>EPDS 10-12 |  | Conflict with a family member is a significant predictor of PPD (at 2 weeks, but not at 8 weeks) (At 2 weeks: OR = 1.7, p = 0.017; At 8 weeks: OR = 1.468, p = 0.229; Binomial regression)                                                                                                                                                                |
| Qutteina, Nasrallah, James-Hawkins, Nur, Yount, Hennink and Abdul                  | Alami, Kadri and Berrada, 2006 [28] | 100 | Morocco | PP: 2-3 weeks<br>12 weeks<br>24 weeks<br>36 weeks | Depression | Unclear | Clinic/Hospital            | Unclear                | Observational, Prospective cohort study | MINI (DSM-IV)          |  | Poor relationship with spouse significantly associated with PPD (14.2% case, 22.6% noncase p < 0.001; Bivariate, ANOVA)                                                                                                                                                                                                                                   |

|                                                                                                                |                                                          |      |       |    |                                                               |         |                     |                                  |                                          |         |  |  |                                                                                                                                                                                                                                                                                                                                                                                                                                                                                                                                                                                   |
|----------------------------------------------------------------------------------------------------------------|----------------------------------------------------------|------|-------|----|---------------------------------------------------------------|---------|---------------------|----------------------------------|------------------------------------------|---------|--|--|-----------------------------------------------------------------------------------------------------------------------------------------------------------------------------------------------------------------------------------------------------------------------------------------------------------------------------------------------------------------------------------------------------------------------------------------------------------------------------------------------------------------------------------------------------------------------------------|
| Rahim,<br>2018 [89]                                                                                            |                                                          |      |       |    |                                                               |         |                     |                                  |                                          |         |  |  | Dissatisfaction in married life is a significant predictor of PPD (OR = 1.26 p = 0.005)<br>Poor marital relationship is a significant predictor of PPD (OR = 1.13 p = 0.048; Multivariate logistic regression)<br>A bad relationship with mother-in-law is significantly associated with PPD (Good: 29.6% case, 43% non-case Bad: 70.4% case, 57% non-case P < 0.001; Bivariate, Chi-square).<br>Poor family support is a significant predictor of PPD (OR = 1.52 p = 0.016; Multivariate logistic regression)                                                                    |
| Qutteina,<br>Nasrallah,<br>James-<br>Hawkins,<br>Nur,<br>Yount,<br>Hennink<br>and Abdul<br>Rahim,<br>2018 [89] | Bener,<br>Burgut,<br>Ghuloum<br>and Sheikh,<br>2012 [74] | 1379 | Qatar | PP | Postnatal<br>depression,<br>anxiety<br>and stress             | Unclear | Clinic/<br>Hospital | Systematic<br>Random<br>sampling | Observat<br>ional<br>cross<br>sectional  | Unclear |  |  | Dissatisfaction in married life is a significant predictor of postpartum anxiety and stress. It is not a significant predictor of PPD (OR = 1.6 p = 0.02; Multivariate logistic regression)<br>Relationship with mother-in-law is not a significant predictor of PPD (OR = not reported p > 0.05), anxiety (OR = not reported p > 0.05) or stress (OR = not reported p > 0.05; Multivariate logistic regression)<br>Poor family support (Lack of family support) is a significant predictor of PPD (OR = 1.6 p = 0.005) and anxiety (OR = 1.9 p < 0.001). It is not a significant |
| Qutteina,<br>Nasrallah,<br>James-<br>Hawkins,<br>Nur,<br>Yount,<br>Hennink<br>and Abdul<br>Rahim,<br>2018 [89] | Bener,<br>Gerber and<br>Sheikh, 2012<br>[23]             | 1659 | Qatar | PP | Anxiety,<br>Stress, PPD<br>(Postpartu<br>m<br>Depression<br>) | Unclear | Unclear             | Systematic<br>random<br>sampling | Observat<br>ional<br>Cross-<br>sectional | Unclear |  |  |                                                                                                                                                                                                                                                                                                                                                                                                                                                                                                                                                                                   |

|                                                                                    |                                                              |              |         |                |            |         |                 |                      |                                  |                               |                                                                                                                                                     |                                                                                     |
|------------------------------------------------------------------------------------|--------------------------------------------------------------|--------------|---------|----------------|------------|---------|-----------------|----------------------|----------------------------------|-------------------------------|-----------------------------------------------------------------------------------------------------------------------------------------------------|-------------------------------------------------------------------------------------|
|                                                                                    |                                                              |              |         |                |            |         |                 |                      |                                  |                               |                                                                                                                                                     | predictor of stress (OR = not reported p > 0.005; Multivariate logistic regression) |
| Qutteina, Nasrallah, James-Hawkins, Nur, Yount, Hennink and Abdul Rahim, 2018 [89] | Chaaya, Campbell, El Kak, Shaar, Harb and Kaddour, 2002 [25] | 396          | Lebanon | PP             | Depression | Unclear | Unclear         | Census of setting    | Observational Prospective cohort | Unclear                       | Poor social support (Social support (more than confidant)) is not a significant predictor of PPD (OR = 0.66 p > 0.05; Multiple logistic regression) |                                                                                     |
| Qutteina, Nasrallah, James-Hawkins, Nur, Yount, Hennink and Abdul Rahim, 2018 [89] | El-Hachem, et al., 2014 [91]                                 | 149          | Lebanon | PP             | Depression | Unclear | Unclear         | Convenience sampling | Observational Cross-sectional    | MSPSS for poor social support | Lack of family support is not a significant predictor of PPD (OR = not reported p > 0.05; Stepwise multiple regression)                             |                                                                                     |
| Qutteina, Nasrallah, James-Hawkins, Nur, Yount, Hennink and Abdul Rahim, 2018 [89] | Ghubash and Abou-Saleh, 1997 [92]                            | 95           | UAE     | PP             | Depression | Unclear | Clinic/Hospital | Census of setting    | Observational Prospective cohort | Unclear                       | Marital problems before birth are a significant predictor of PPD (p < 0.0001; DFA (Discriminant Function Analysis))                                 |                                                                                     |
| Qutteina, Nasrallah, James-                                                        | Green, Broome and                                            | 3 months: 86 | UAE     | PP: 3,6 months | Depression | Unclear | Clinic/Hospital | Census of setting    | Observational                    | Unclear                       | Relationship with husband is not significantly associated with PPD (p = n. s.; Bivariate, Chi-square).                                              |                                                                                     |

|                                                                                    |                                                      |                  |         |                        |            |         |                     |                      |                                             |                        |                                                                                                                                                                                                                                                                                                                                                                                                                                                                                                                                                                                                                                                                                                                                            |                                                                                                                                                                                                                                                                           |
|------------------------------------------------------------------------------------|------------------------------------------------------|------------------|---------|------------------------|------------|---------|---------------------|----------------------|---------------------------------------------|------------------------|--------------------------------------------------------------------------------------------------------------------------------------------------------------------------------------------------------------------------------------------------------------------------------------------------------------------------------------------------------------------------------------------------------------------------------------------------------------------------------------------------------------------------------------------------------------------------------------------------------------------------------------------------------------------------------------------------------------------------------------------|---------------------------------------------------------------------------------------------------------------------------------------------------------------------------------------------------------------------------------------------------------------------------|
| Hawkins, Nur, Yount, Hennink and Abdul Rahim, 2018 [89]                            | Mirabella, 2006 [26]                                 | 6 months:<br>56  |         |                        |            |         |                     |                      |                                             | Prospecti<br>ve cohort |                                                                                                                                                                                                                                                                                                                                                                                                                                                                                                                                                                                                                                                                                                                                            | Relationship with own mother is not significantly associated with PPD (p= n. s. Bivariate, Chi-square). Relationship with mother-in-law is significantly associated with PPD (at 3 months, but not at 6 months) (At 3 months: p = 0.02, at 6 months: p= n. s.; Bivariate) |
| Qutteina, Nasrallah, James-Hawkins, Nur, Yount, Hennink and Abdul Rahim, 2018 [89] | Lteif, Kesrouani and Richa, 2005 [85]                | 79               | Lebanon | AP                     | Depression | Unclear | Clinic/<br>Hospital | Census of<br>setting | Observat<br>ional<br>Cross-<br>sectional    | Unclear                | Marital problems ( OR not reported p = 0.018; Bivariate, logistic regression), poor husband support (OR = 10.4 p = 0.001; Bivariate, logistic regression) , poor quality of sexual relationship prior to pregnancy (OR = 13.3 p = 0.001; Bivariate, logistic regression) and decreased desire of the husband (OR not reported p > 0.05; Bivariate, logistic regression) are significantly associated with prenatal depression. Poor quality of sexual relationship during pregnancy (OR = 6.9 p = 0.002; Bivariate, logistic regression) is not significantly associated with prenatal depression. Poor family support is not significantly associated with prenatal depression (OR not reported p > 0.05; Bivariate, logistic regression) |                                                                                                                                                                                                                                                                           |
| Qutteina, Nasrallah, James-Hawkins, Nur,                                           | Masmoudi, Tabelsi, Charfeddine , Ben Ayed, Guermazzi | 2-5 days:<br>213 | Tunisia | PP:2-5 days, 6-8 weeks | Depression | Unclear | Clinic/<br>Hospital | Census of<br>setting | Observat<br>ional<br>Prospecti<br>ve cohort | Unclear                | Poor quality of marital relationship is significantly associated with PPD (Good: 73.52% case, 11.02% non-case Bad: 13.23% case, 2.2% non-                                                                                                                                                                                                                                                                                                                                                                                                                                                                                                                                                                                                  |                                                                                                                                                                                                                                                                           |

|                                                                                    |                                                                                            |                               |         |                          |            |         |                 |                   |                                  |                              |  |                                                                                                                                                                                                                                                                                                                                                          |
|------------------------------------------------------------------------------------|--------------------------------------------------------------------------------------------|-------------------------------|---------|--------------------------|------------|---------|-----------------|-------------------|----------------------------------|------------------------------|--|----------------------------------------------------------------------------------------------------------------------------------------------------------------------------------------------------------------------------------------------------------------------------------------------------------------------------------------------------------|
| Yount, Hennink and Abdul Rahim, 2018 [89]                                          | and Jaoua, 2008 [35]                                                                       | 6-8 weeks: 136                |         |                          |            |         |                 |                   |                                  |                              |  | case p = 0.034; Bivariate, Chi-square)                                                                                                                                                                                                                                                                                                                   |
| Qutteina, Nasrallah, James-Hawkins, Nur, Yount, Hennink and Abdul Rahim, 2018 [89] | Masmoudi, Charfeddine, Trabelsi, Feki, Ben Ayad, Guermazi, Baati and Jaoua, 2014 [86]      | 2-5 days: 302 6-10 weeks: 139 | Tunisia | PP: 2-5 days, 6-10 weeks | Depression | Unclear | Clinic/Hospital | Census of setting | Observational Prospective cohort | MSSS for poor social support |  | Lower quality of marital relationship (AZRIN is significantly associated with PPD (p = 0.034; Bivariate, Chi-square)<br>Poor social support is not significantly associated with PPD (p = 0.29; Bivariate, Chi-square)                                                                                                                                   |
| Qutteina, Nasrallah, James-Hawkins, Nur, Yount, Hennink and Abdul Rahim, 2018 [89] | Masmoudi, Trabelsi, Charfeddine, Ben Ayed, Guermazi, Jaoua, Karam and Hantouche, 2010 [87] | 213                           | Tunisia | PP                       | Depression | Unclear | Clinic/Hospital | Census of setting | Observational cross-sectional    | Unclear                      |  | Poor quality of marital relationship is a significant predictor of PPD (OR = 3.806 p = 0.009; Multivariate logistic regression).<br>Poor family support (Lack of social and family support) is a significant predictor of PPD (OR = 2.265 p = 0.071; Multivariate logistic regression)                                                                   |
| Qutteina, Nasrallah, James-Hawkins, Nur, Yount, Hennink and Abdul Rahim, 2018 [89] | Mohammad, Gamble and Creedy, 2011 [29]                                                     | 353                           | Jordan  | PP                       | Depression | Unclear | Hospital        | Unclear           | Observational cross-sectional    | MSSS for poor social support |  | Difficult marital relationship is significantly associated with PPD (At 6-8 weeks: p = 0.009; At 6 months: p = 0.003; Bivariate, Chi-square).<br>Difficult relationship with mother-in-law is a significant predictor of PPD (B = -0.194 p < 0.001; Stepwise multiple regression).<br>Poor social support score is a significant predictor of PPD (B = - |



|                                                                                    |                                                |     |         |    |                   |         |                 |                      |                                              |         |                                                                                                                                                                                                                                                                                                                                                                                                                            |                                                |
|------------------------------------------------------------------------------------|------------------------------------------------|-----|---------|----|-------------------|---------|-----------------|----------------------|----------------------------------------------|---------|----------------------------------------------------------------------------------------------------------------------------------------------------------------------------------------------------------------------------------------------------------------------------------------------------------------------------------------------------------------------------------------------------------------------------|------------------------------------------------|
|                                                                                    |                                                |     |         |    |                   |         |                 |                      |                                              |         |                                                                                                                                                                                                                                                                                                                                                                                                                            | 0.123 p = 0.003; Stepwise multiple regression) |
| Qutteina, Nasrallah, James-Hawkins, Nur, Yount, Hennink and Abdul Rahim, 2018 [89] | Nayak and Al-Yattama, 1999 [93]                | 248 | Kuwait  | AP | Depression        | Unclear | Clinic/Hospital | Census of setting    | Cross-sectional                              | Unclear | Marital conflict is not significantly associated with prenatal depression (p = 0.647; Analysis of covariance)<br>Past assault history (familial or non-familial) is significantly associated with prenatal depression (p < 0.001; Analysis of covariance)                                                                                                                                                                  |                                                |
| Qutteina, Nasrallah, James-Hawkins, Nur, Yount, Hennink and Abdul Rahim, 2018 [89] | Osman, et al., 2014 [94]                       | 452 | Lebanon | PP | Postpartum Stress | Unclear | Unclear         | Census of setting    | Randomized controlled trial (Single blinded) | Unclear | Increased social support is significantly associated with lower postpartum stress:<br>Postpartum support film alone (Treatment ((15.76 ± 6.55) vs control group (18.93 ± 7.03) p < 0.01))<br>Postpartum support film with hotline service (Treatment (15.86 ± 6.81) vs control group (18.93 ± 7.03) p < 0.01))<br>Hotline service alone (Treatment (16.98 ± 6.42) vs control group (18.93 ± 7.03) p < 0.05) Bivariate test |                                                |
| Qutteina, Nasrallah, James-Hawkins, Nur, Yount, Hennink and Abdul Rahim, 2018 [89] | Yehia, Callister and Hamdan-Mansour, 2013 [31] | 300 | Jordan  | PP | Depression        | Unclear | Clinic/Hospital | Convenience sampling | Observational Cross-sectional                | MSPSS   | Poor family social support is a significant predictor of PPD (B = -0.13 p = 0.007; Multiple hierarchical regression).<br>Poor friend (B = not reported p > 0.05; Multiple hierarchical regression) and others social support is not a significant predictor of PPD (B = not reported p > 0.05; Multiple hierarchical regression).                                                                                          |                                                |

|                                                  |                                        |     |         |                                                                                             |            |         |                            |             |                    |                            |                                                                                                                                                                                                                                                           |
|--------------------------------------------------|----------------------------------------|-----|---------|---------------------------------------------------------------------------------------------|------------|---------|----------------------------|-------------|--------------------|----------------------------|-----------------------------------------------------------------------------------------------------------------------------------------------------------------------------------------------------------------------------------------------------------|
| Sawyer, Ayers and Smith, 2010 [20]               | Alami, Kadri and Berrada, 2006 [28]    | 100 | Morocco | Age (19-43); AP: 1 <sup>st</sup> , 2 <sup>nd</sup> and 3 <sup>rd</sup> trimester            | Depression | Unclear | Unclear                    | Unclear     | Longitudinal       |                            | Non-significant factors:<br>Age<br>Education<br>Parity                                                                                                                                                                                                    |
| Sawyer, Ayers and Smith, 2010 [20]               | Alami, Kadri and Berrada, 2006 [28]    | 100 | Morocco | PP: 2-3 weeks<br>12 weeks,<br>24 weeks,<br>36 weeks                                         | Depression | Unclear | Unclear                    | Unclear     | Longitudinal       | MINI (DSM-IV)              | Significant risk Factors:<br>Complications during pregnancy<br>Low birth weight<br>Marital conflict<br>Unhappiness during pregnancy<br>Non-significant risk factors:<br>Age<br>Education<br>Employment<br>Parity<br>Mode of delivery<br>Place of delivery |
| Sawyer, Ayers and Smith, 2010 [20]               | Agoub, Moussaoui and Battas, 2005 [22] | 144 | Morocco | PP: 2-3 weeks<br>6 weeks<br>6 <sup>th</sup> month,<br>9 <sup>th</sup> month<br>Age (18-44); | Depression | Unclear | Unclear                    | Unclear     | Longitudinal       | MINI (DSM-IV)              | Significant risk Factors:<br>Complications during pregnancy<br>Marital conflict<br>Lack of support from family and partner<br>Non-significant risk factors:<br>Age<br>Education<br>Employment<br>Marital status<br>Mode of delivery<br>Place of delivery  |
| Shorey, Chee, Ng, Chan, Tam and Chong, 2018 [21] | Agoub, Moussaoui and Battas, 2005 [22] | 144 | Morocco | PP: 2-3 weeks<br>6 weeks<br>6 <sup>th</sup> month,<br>9 <sup>th</sup> month                 | Depression | Unclear | primary healthcare setting | Convenience | Prospective cohort | MINI EPDS (Arabic version) | Pregnancy complications<br>Stressful life events during pregnancy<br>Baby's health problems<br>Poor marital relationship                                                                                                                                  |

|                                                  |                                                            |     |          |                                                                 |            |         |                                  |             |                                         |                                                                                                                                                                                      |                                                                                                                                                                                            |
|--------------------------------------------------|------------------------------------------------------------|-----|----------|-----------------------------------------------------------------|------------|---------|----------------------------------|-------------|-----------------------------------------|--------------------------------------------------------------------------------------------------------------------------------------------------------------------------------------|--------------------------------------------------------------------------------------------------------------------------------------------------------------------------------------------|
| Shorey, Chee, Ng, Chan, Tam and Chong, 2018 [21] | Al Hinai and Al Hinai, 2014 [32]                           | 282 | Oman     | PP: 2 weeks, 8 weeks                                            | Depression | Unclear | Primary health care facility     | Unclear     | Prospective cohort                      | EPDS $\geq$ 13                                                                                                                                                                       | Work difficulties<br>Conflict with family member<br>Sickness of a family member                                                                                                            |
| Shorey, Chee, Ng, Chan, Tam and Chong, 2018 [21] | Green, Broome and Mirabella, 2006 [26]                     | 56  | UAE      | PP: 3, 6 months                                                 | Depression | Unclear | Government maternity hospital    | Convenience | Prospective cohort                      | EPDS>13 (Arabic version)                                                                                                                                                             | Not breastfeeding<br>First childbirth<br>Poor self-body image and view of weight<br>Poor relationship with mother-in-law<br>Older age at marriage                                          |
| Shorey, Chee, Ng, Chan, Tam and Chong, 2018 [21] | Hamdan and Tamim, 2011 [27]                                | 137 | UAE      | AP: 2 <sup>nd</sup> , 3 <sup>rd</sup> trimester<br>PP: 2 months | Depression | Unclear | maternal and child health center | Convenience | Prospective cohort                      | Depressive symptoms- BDI<br>Anxiety Symptoms- BAI<br>Stressful Life events-<br>Stressful life events<br>Inventory Postpartum Depression -MINI (Diagnosis)<br>-EPDS (>10) (Screening) | Depression during pregnancy<br>Number of children<br>Religion<br>Low educational level of mother<br>Lack of breastfeeding<br>Stressful life events<br>Employment status following delivery |
| Shorey, Chee, Ng, Chan, Tam and Chong, 2018 [21] | Husain, Bevc, Husain, Chaudhry, Atif and Rahman, 2006 [40] | 149 | Pakistan | PP: 12 weeks                                                    | Depression | Unclear | Community                        | Convenience | Cross-sectional population-based survey | EPDS<br>Social Support- MSPSS<br>Mental Distress- SRQ-20                                                                                                                             | Lower social support<br>Increased stressful life events in the preceding year<br>Higher levels of psychological distress in the antenatal period.                                          |

|                                                  |                                                            |         |          |                                                      |            |         |                                                                                                        |         |                          |                            |                                                                                                                                                                                                                   |
|--------------------------------------------------|------------------------------------------------------------|---------|----------|------------------------------------------------------|------------|---------|--------------------------------------------------------------------------------------------------------|---------|--------------------------|----------------------------|-------------------------------------------------------------------------------------------------------------------------------------------------------------------------------------------------------------------|
| Shorey, Chee, Ng, Chan, Tam and Chong, 2018 [21] | Rahman, Iqbal and Harrington, 2003 [39]                    | 541     | Pakistan | AP: 3 <sup>rd</sup> trimester<br>PP: 10-12 weeks     | Depression | Unclear | Community                                                                                              | Unclear | Unclear                  | SCAN<br>PIQ<br>LEDS<br>BDQ | More disabilities<br>More threatening life events<br>Poorer social and family support<br>Vulnerable mothers were more likely to be depressed during pregnancy, rather than have an onset in the post-natal period |
| Shorey, Chee, Ng, Chan, Tam and Chong, 2018 [21] | Rahman and Creed, 2007 [41]                                | 129     | Pakistan | AP: 3 <sup>rd</sup> trimester<br>PP: 3, 6, 12 months | Depression | Unclear | Unclear                                                                                                | Unclear | Prospective study        | SCAN<br>PIQ<br>LEDS<br>BDQ | Poverty<br>Having 5 or more children<br>Uneducated husband<br>Lack of a confidant or friend                                                                                                                       |
| Zahidie and Jamali, 2013 [38]                    | Ali, Ali and Azam, 2009 [58]                               | Unclear | Pakistan | PP: 1,2,6 and 12 months                              | Depression | Unclear | Urban communities of karachi                                                                           | Unclear | Quasi-experimental study | AKUADS<br>DSM IV           | Domestic violence<br>Difficulty in breast feeding at birth (p-value = 0.125)<br>Child having any difficulty soon after birth (cyanosis/apnea/flaccidity, p-value = 0.03)<br>Unplanned pregnancy (p-value = 0.038) |
| Zahidie and Jamali, 2013 [38]                    | Husain, Bevc, Husain, Chaudhry, Atif and Rahman, 2006 [40] | Unclear | Pakistan | AP, PP- 3 months                                     | Depression | Unclear | community setting of Kallar Syedan, one of four administrative Circles of a sub-district in Rawalpindi | Unclear | Population-based survey  | EPDS<br>MSPSS<br>PIQ       | Lower social support<br>Increased stressful life events in the preceding year<br>Higher levels of psychological distress in the antenatal period                                                                  |
| Zahidie and Jamali, 2013 [38]                    | Husain, Parveen, Husain, Saeed, Jafri,                     | Unclear | Pakistan | AP                                                   | Depression | Unclear | antenatal clinics of Chiniot and                                                                       | Unclear | Cohort study             | EPDS                       | Disability and stressful life events.                                                                                                                                                                             |

|                                     |                                                                                                             |      |          |                                  |                            |         |                                                                                       |                                          |                             |                              |                                                                          |  |
|-------------------------------------|-------------------------------------------------------------------------------------------------------------|------|----------|----------------------------------|----------------------------|---------|---------------------------------------------------------------------------------------|------------------------------------------|-----------------------------|------------------------------|--------------------------------------------------------------------------|--|
|                                     | Rahman,<br>Tomenson<br>and<br>Chaudhry,<br>2011 [47]                                                        |      |          |                                  |                            |         |                                                                                       | maternity<br>and<br>childcare<br>centers |                             |                              |                                                                          |  |
| Zahidie<br>and Jamali,<br>2013 [38] | Husain,<br>Parveen,<br>Husain,<br>Saeed, Jafri,<br>Rahman,<br>Tomenson<br>and<br>Chaudhry,<br>2011 [47]     | 149  | Pakistan | PP: 12<br>weeks                  | Depression                 | Unclear | antenatal<br>clinics of<br>Chiniot<br>and<br>maternity<br>and<br>childcare<br>centers | Unclear                                  | Cohort<br>study             | EPDS                         | Disability and stressful life events.                                    |  |
| Zahidie<br>and Jamali,<br>2013 [38] | Asad,<br>Karmaliani,<br>Sullaiman,<br>Bann,<br>McClure,<br>Pasha,<br>Wright and<br>Goldenberg,<br>2010 [59] | 1368 | Pakistan | AP                               | Depression<br>/<br>Anxiety | Unclear | Primary<br>care health<br>centres                                                     | Unclear                                  | Cross<br>sectional<br>study | AKUADS                       | Verbal or physical/sexual abuse                                          |  |
| Zahidie<br>and Jamali,<br>2013 [38] | Asad,<br>Karmaliani,<br>Sullaiman,<br>Bann,<br>McClure,<br>Pasha,<br>Wright and<br>Goldenberg,<br>2010 [59] | 148  | Pakistan | AP                               | Attempted<br>Suicide       | Unclear | Primary<br>care health<br>centres                                                     | Unclear                                  | Cross<br>sectional<br>study | AKUADS                       | Verbal or physical/sexual abuse                                          |  |
| Zahidie<br>and Jamali,<br>2013 [38] | Rahman,<br>Iqbal and<br>Harrington,<br>2003 [39]                                                            | 632  | Pakistan | AP: 3 <sup>rd</sup><br>trimester | Depression                 | Unclear | Unclear                                                                               | Unclear                                  | Two<br>stage<br>cross-      | SCAN<br>PIQ<br>BDQ<br>ICD-10 | Disability<br>Threatening life events<br>Poor social and family support. |  |

|                               |                                                         |         |          |                               |            |               |                    |             |                                                                                                                    |                              |                                                                                                                                                                                                                                                        |
|-------------------------------|---------------------------------------------------------|---------|----------|-------------------------------|------------|---------------|--------------------|-------------|--------------------------------------------------------------------------------------------------------------------|------------------------------|--------------------------------------------------------------------------------------------------------------------------------------------------------------------------------------------------------------------------------------------------------|
|                               |                                                         |         |          |                               |            |               |                    |             | sectional survey                                                                                                   |                              |                                                                                                                                                                                                                                                        |
| Zahidie and Jamali, 2013 [38] | Rahman, Iqbal and Harrington, 2003 [39]                 | 541     | Pakistan | PP:10-12 weeks post delivery  | Depression | Unclear       | Unclear            | Unclear     | Two stage cross-sectional survey                                                                                   | SCAN<br>PIQ<br>BDQ<br>ICD-10 | Disability<br>Threatening life events<br>Poor social and family support<br>Financial independence of women.<br>No association between post-natal depression and husband's monthly income, or poor socioeconomic situation                              |
| Zahidie and Jamali, 2013 [38] | Rahman and Creed, 2007 [41]                             | Unclear | Pakistan | AP:3, 6 months                | Depression | Unclear       | Unclear            | Unclear     | Four stage cross-sectional survey                                                                                  | Unclear                      | poverty during pregnancy                                                                                                                                                                                                                               |
| Zahidie and Jamali, 2013 [38] | Rahman and Creed, 2007 [41]                             | Unclear | Pakistan | PP: 3, 12 months              | Depression | Unclear       | Unclear            | Unclear     | Four stage cross-sectional survey                                                                                  | Unclear                      | poverty during pregnancy                                                                                                                                                                                                                               |
| Zahidie and Jamali, 2013 [38] | Zahidie, Kazi, Fatmi, Bhatti and Dureshahwar, 2011 [53] | Unclear | Pakistan | AP                            | Depression | Unclear       | Rural community    | Unclear     | Mix method study.<br>Qualitative phase I: (in-depth interviews)<br>Quantitative phase II: (cross-sectional survey) | CEDS                         | Social conditions, as compared to social relations, were more important determinants for depression among women. The results of this study showed that for each unit increase in poor social conditions, there was 0.57 increase in depression scores. |
| Additional primary            | Husain, Munshi,                                         | 1357    | Pakistan | AP: 3 <sup>rd</sup> trimester | Depression | March 2004 to | Maternity home and | Consecutive | Cohort study                                                                                                       | PIQ                          | No significant association with<br>Low birth weight in newborns                                                                                                                                                                                        |

|                    |                                                                        |     |              |                                 |                      |                  |           |                           |         |                           |                                                                                                                                                                       |
|--------------------|------------------------------------------------------------------------|-----|--------------|---------------------------------|----------------------|------------------|-----------|---------------------------|---------|---------------------------|-----------------------------------------------------------------------------------------------------------------------------------------------------------------------|
| studies identified | Jafri, Husain, Parveen, Saeed, Tomenson, Naeem and Chaudhry, 2014 [61] |     |              |                                 | April 2005           | childcare center |           |                           |         | EPDS- Urdu version SRQ-20 | Problem with previous delivery 0.877 (0.728-1.056)                                                                                                                    |
|                    | Amr and Hussein Balaha, 2010 [95]                                      | 367 | Saudi Arabia | Teenage and Primigravid mothers | Perinatal depression | Unclear          | Unclear   | Unclear                   | Unclear | MINI                      | Urban residence<br>Poor husband support<br>History of psychiatric illness<br>Anaemia<br>Caesarean delivery<br>Female delivery<br>Difficult delivery<br>Unhealthy baby |
|                    | Ghubash and Eapen, 2009 [96]                                           | 19  | UAE          | AP                              | Perinatal depression | Unclear          | Unclear   | Public and private clinic | Unclear | Focus groups              | Difficult baby and poor bonding<br>Lack of support<br>Loneliness and isolation from family of origin<br>Conflict with regards to mother's role                        |
|                    | Al-Modayfer, Alatiq, Khair and Abdelkawi, 2015 [63]                    | 571 | Saudi Arabia | PP: 5 weeks after delivery      | Depression           | Unclear          | Community | Unclear                   | Unclear | EPDS                      | Previous psychiatric history<br>Mother's health during pregnancy<br>Delivery time                                                                                     |

(SSDS) The Siddique Shah Depression scale; (EPDS) Edinburgh Postnatal Depression Scale; (PDSS) Postnatal Depression Screening scale; (BDI) Beck Depression Inventory; (HADS) Hospital Anxiety and Depression Scale; (DASS) Depression Anxiety Stress Scale; (BDQ) Brief Disability Questionnaire; (PIQ) Personal Information Questionnaire; (LEDS) Life events and difficulties Schedule; (BAI) Anxiety Symptoms; (DUCOS) Duke Social Support and Stress Scale; (MSSS) Maternity Social Support Score; (DDI) Depression Detailed Inventory; (PKS) Perceived knowledge scale; (PSES) Perceived Self-efficacy scale; (SRQ-20) Self Reporting Questionnaire; (SCAN) WHO Schedule for Clinical Assessment in Neuropsychiatry; (MSPSS) Multidimensional Scale of Perceived Social Support; (CES-D) The Centre for Epidemiology Studies-Depression scale; (AKUADS) Aga Khan University Anxiety Depression Scale AP- Antepartum PP- Postpartum T- Time frame PND- Perinatal Depression PPD- Postpartum Depression ref- Reference UaA- Unadjusted association Aa- adjusted association CI-Confidence Interval

**Table S7: Quality assessment of prevalence outcomes in Middle East and North Africa**

| Systematic Review                                                          | Primary study                                                                                          | Population | Outcome | Data collection time | Study setting |
|----------------------------------------------------------------------------|--------------------------------------------------------------------------------------------------------|------------|---------|----------------------|---------------|
| Afzal and Khalid, 2016 [4]                                                 | Rasheed, 1988 [5]                                                                                      | Yes        | Yes     | No                   | No            |
| Afzal and Khalid, 2016 [4]                                                 | Khalid, 1989 [6]                                                                                       | Yes        | Yes     | No                   | No            |
| Afzal and Khalid, 2016 [4]                                                 | Sarwar, 1990 [7]                                                                                       | Yes        | Yes     | No                   | No            |
| Afzal and Khalid, 2016 [4]                                                 | Habib, 1997 [8]                                                                                        | Yes        | Yes     | No                   | No            |
| Afzal and Khalid, 2016 [4]                                                 | Ahmed, 2005 [9]                                                                                        | Yes        | Yes     | No                   | Yes           |
| Afzal and Khalid, 2016 [4]                                                 | Munaf, 2006 [71]                                                                                       | Yes        | Yes     | No                   | No            |
| Afzal and Khalid, 2016 [4]                                                 | Muneer, Minhas, Tamiz-ud-Din Nizami, Mujeeb and Usmani, 2009 [10]                                      | Yes        | Yes     | No                   | No            |
| Afzal and Khalid, 2016 [4]                                                 | Karmaliani, Asad, Bann, Moss, McClure, Pasha, Wright and Goldenberg, 2009 [12]                         | Yes        | Yes     | No                   | No            |
| Afzal and Khalid, 2016 [4]                                                 | Haider, 2010 [13]                                                                                      | Yes        | Yes     | No                   | No            |
| Afzal and Khalid, 2016 [4]                                                 | Yasmeen, Tayyaba, Chatan, Naeem, Numan and Adnan Maqsood, 2010 [14]                                    | Yes        | Yes     | No                   | Yes           |
| Afzal and Khalid, 2016 [4]                                                 | Shah, Bowen, Afridi, Nowshad and Muhajarine, 2011 [15]                                                 | Yes        | Yes     | No                   | No            |
| Afzal and Khalid, 2016 [4]                                                 | Gul, Bajwa, Niaz, Haroon, Liaqat, Ahmad, Dawood, Ghazal, Bhatti, Nazir, Riffat and Chaudhry, 2013 [70] | Yes        | Yes     | No                   | No            |
| Afzal and Khalid, 2016 [4]                                                 | Afzal and Khalid, 2014 [69]                                                                            | Yes        | Yes     | No                   | No            |
| Afzal and Khalid, 2016 [4]                                                 | Ghazala Sadiq, 2015 [72]                                                                               | Yes        | Yes     | No                   | No            |
| Alhasanat and Fry-McComish, 2015 [16]                                      | Saleh el, El-Bahei, Del El-Hadidy and Zayed, 2013 [30]                                                 | Yes        | Yes     | No                   | No            |
| Amber Haque, 2015 [18]                                                     | Balaha, Amr, El-Gilany and Sheikh, 2009 [34]                                                           | Yes        | Yes     | Unclear              | Yes           |
| Amber Haque, 2015 [18]                                                     | Naglaa A. Mohamed and Maklof, 2011 [33]                                                                | Yes        | Yes     | No                   | Yes           |
| Fisher, Cabral de Mello, Patel, Rahman, Tran, Holton and Holmes, 2012 [19] | Karmaliani, Bann, Mahmood, Harris, Akhtar, Goldenberg and Moss, 2006 [36]                              | Yes        | Yes     | No                   | Yes           |
| Fuhr, Calvert, Ronsmans, Chandra, Sikander, De Silva and Patel, 2014 [64]  | Farhat, Chaouch, Chelli, Gara, Boukraa, Garbouj, Hamrouni, Fourati, Calvez and Thonneau, 2012 [65]     | Yes        | Yes     | Yes                  | Yes           |
| Fuhr, Calvert, Ronsmans, Chandra, Sikander, De Silva and Patel, 2014 [64]  | Jafarey, Rizvi, Koblinsky and Kureshy, 2009 [67]                                                       | Yes        | Yes     | Yes                  | Yes           |



|                                                                                              |                                                            |     |     |         |     |
|----------------------------------------------------------------------------------------------|------------------------------------------------------------|-----|-----|---------|-----|
| Fuhr, Calvert, Ronsmans, Chandra, Sikander, De Silva and Patel, 2014 [64]                    | Population, 2001 [68]                                      | Yes | Yes | Yes     | Yes |
| Fuhr, Calvert, Ronsmans, Chandra, Sikander, De Silva and Patel, 2014 [64]                    | Amarin, Khader, Okour, Jaddou and Al-Qutob, 2010 [66]      | Yes | Yes | Yes     | Yes |
| James-Hawkins, Shaltout, Nur, Nasrallah, Qutteina, Abdul Rahim, Hennink and Yount, 2019 [75] | Abuidhail and Abujilban, 2014 [77]                         | Yes | Yes | Unclear | Yes |
| James-Hawkins, Shaltout, Nur, Nasrallah, Qutteina, Abdul Rahim, Hennink and Yount, 2019 [75] | Al Dallal and Grant, 2012 [73]                             | Yes | Yes | Unclear | Yes |
| James-Hawkins, Shaltout, Nur, Nasrallah, Qutteina, Abdul Rahim, Hennink and Yount, 2019 [75] | Alharbi and Abdulghani, 2014 [80]                          | Yes | Yes | Unclear | Yes |
| James-Hawkins, Shaltout, Nur, Nasrallah, Qutteina, Abdul Rahim, Hennink and Yount, 2019 [75] | Al Hinai and Al Hinai, 2014 [32]                           | Yes | Yes | Unclear | Yes |
| James-Hawkins, Shaltout, Nur, Nasrallah, Qutteina, Abdul Rahim, Hennink and Yount, 2019 [75] | Bener, 2013 [81]                                           | Yes | Yes | Unclear | Yes |
| James-Hawkins, Shaltout, Nur, Nasrallah, Qutteina, Abdul Rahim, Hennink and Yount, 2019 [75] | Burgut, Bener, Ghuloum and Sheikh, 2013 [82]               | Yes | Yes | Unclear | Yes |
| James-Hawkins, Shaltout, Nur, Nasrallah, Qutteina, Abdul Rahim, Hennink and Yount, 2019 [75] | El-Khoury, Karam and Melhem, 1999 [83]                     | Yes | Yes | Unclear | Yes |
| James-Hawkins, Shaltout, Nur, Nasrallah, Qutteina, Abdul Rahim, Hennink and Yount, 2019 [75] | Hamdan and Tamim, 2011 [27]                                | Yes | Yes | Unclear | Yes |
| James-Hawkins, Shaltout, Nur, Nasrallah, Qutteina, Abdul Rahim, Hennink and Yount, 2019 [75] | Khabour, Amarneh, Bani Hani and Lataifeh, 2013 [84]        | Yes | Yes | Unclear | Yes |
| Jones and Coast, 2013 [37]                                                                   | Husain, Bevc, Husain, Chaudhry, Atif and Rahman, 2006 [40] | Yes | Yes | No      | Yes |
| Jones and Coast, 2013 [37]                                                                   | Rahman, Iqbal and Harrington, 2003 [39]                    | Yes | Yes | No      | Yes |
| Jones and Coast, 2013 [37]                                                                   | Rahman and Creed, 2007 [41]                                | Yes | Yes | No      | Yes |

|                                                                                    |                                                                                         |         |         |         |         |
|------------------------------------------------------------------------------------|-----------------------------------------------------------------------------------------|---------|---------|---------|---------|
| Klainin and Arthur, 2009 [24]                                                      | Chaaya, Campbell, El Kak, Shaar, Harb and Kaddour, 2002 [25]                            | Yes     | Yes     | Unclear | Yes     |
| Klainin and Arthur, 2009 [24]                                                      | Green, Broome and Mirabella, 2006 [26]                                                  | Yes     | Yes     | Unclear | Yes     |
| Klainin and Arthur, 2009 [24]                                                      | Kalyani, Saeed, Rehman and Mubbashar, 2001 [42]                                         | Yes     | Yes     | Unclear | Yes     |
| Klainin and Arthur, 2009 [24]                                                      | Stuchbery, Matthey and Barnett, 1998 [88]                                               | Unclear | Unclear | Unclear | Unclear |
| Mahendran, Puthussery and Amalan, 2019 [11]                                        | Fareha Hamid, 2008 [45]                                                                 | Yes     | Yes     | No      | Yes     |
| Mahendran, Puthussery and Amalan, 2019 [11]                                        | Ali, Azam, Ali, Tabbusum and Moin, 2012 [43]                                            | Yes     | Yes     | No      | Yes     |
| Mahendran, Puthussery and Amalan, 2019 [11]                                        | Humayun, Haider, Imran, Iqbal and Humayun, 2013 [46]                                    | Yes     | Yes     | No      | Yes     |
| Mahendran, Puthussery and Amalan, 2019 [11]                                        | Waqas, Raza, Lodhi, Muhammad, Jamal and Rehman, 2015 [52]                               | Yes     | Yes     | No      | Yes     |
| Mahendran, Puthussery and Amalan, 2019 [11]                                        | Saeed, Raana, Saeed and Humayun, 2016 [51]                                              | Yes     | Yes     | No      | Yes     |
| Mahendran, Puthussery and Amalan, 2019 [11]                                        | Din, Ambreen, Iqbal, Iqbal and Ahmad, 2016 [44]                                         | Yes     | Yes     | No      | Yes     |
| Mahendran, Puthussery and Amalan, 2019 [11]                                        | Syeda Rabia, 2017 [49]                                                                  | Yes     | Yes     | No      | Yes     |
| Mahendran, Puthussery and Amalan, 2019 [11]                                        | Sharifa Mir, 2012 [48]                                                                  | Yes     | Yes     | No      | Yes     |
| Mahendran, Puthussery and Amalan, 2019 [11]                                        | Sadaf, 2011 [50]                                                                        | Yes     | Yes     | No      | Yes     |
| Qutteina, Nasrallah, James-Hawkins, Nur, Yount, Hennink and Abdul Rahim, 2018 [89] | Abdelhai and Mosleh, 2015 [76]                                                          | Yes     | Yes     | Unclear | Yes     |
| Qutteina, Nasrallah, James-Hawkins, Nur, Yount, Hennink and Abdul Rahim, 2018 [89] | Abou-Saleh and Ghubash, 1997 [17]                                                       | Yes     | Yes     | Unclear | Yes     |
| Qutteina, Nasrallah, James-Hawkins, Nur, Yount, Hennink and Abdul Rahim, 2018 [89] | Abujilban, Abuidhail, Al-Modallal, Hamaideh and Mosemli, 2014 [78]                      | Yes     | Yes     | Unclear | Unclear |
| Qutteina, Nasrallah, James-Hawkins, Nur, Yount, Hennink and Abdul Rahim, 2018 [89] | Alasoom and Koura, 2014 [90]                                                            | Yes     | Yes     | Unclear | Yes     |
| Qutteina, Nasrallah, James-Hawkins, Nur, Yount, Hennink and Abdul Rahim, 2018 [89] | Al-Azri, Al-Lawati, Al-Kamyani, Al-Kiyumi, Al-Rawahi, Davidson and Al-Maniri, 2016 [79] | Yes     | Yes     | Unclear | Unclear |
| Qutteina, Nasrallah, James-Hawkins, Nur, Yount, Hennink and Abdul Rahim, 2018 [89] | Bener, Burgut, Ghuloum and Sheikh, 2012 [74]                                            | Yes     | Yes     | Unclear | Unclear |
| Qutteina, Nasrallah, James-Hawkins, Nur, Yount, Hennink and Abdul Rahim, 2018 [89] | Bener, Gerber and Sheikh, 2012 [23]                                                     | Yes     | Yes     | Unclear | Unclear |

|                                                                                    |                                                                                                                       |     |     |         |         |
|------------------------------------------------------------------------------------|-----------------------------------------------------------------------------------------------------------------------|-----|-----|---------|---------|
| Qutteina, Nasrallah, James-Hawkins, Nur, Yount, Hennink and Abdul Rahim, 2018 [89] | El-Hachem, Rohayem, Bou Khalil, Richa, Kesrouani, Gemayel, Aouad, Hatab, Zaccak, Yaghi, Salameh and Attieh, 2014 [91] | Yes | Yes | Unclear | Unclear |
| Qutteina, Nasrallah, James-Hawkins, Nur, Yount, Hennink and Abdul Rahim, 2018 [89] | Ghubash and Abou-Saleh, 1997 [92]                                                                                     | Yes | Yes | Unclear | Yes     |
| Qutteina, Nasrallah, James-Hawkins, Nur, Yount, Hennink and Abdul Rahim, 2018 [89] | Lteif, Kesrouani and Richa, 2005 [85]                                                                                 | Yes | Yes | Unclear | Yes     |
| Qutteina, Nasrallah, James-Hawkins, Nur, Yount, Hennink and Abdul Rahim, 2018 [89] | Nayak and Al-Yattama, 1999 [93]                                                                                       | Yes | Yes | Unclear | Yes     |
| Qutteina, Nasrallah, James-Hawkins, Nur, Yount, Hennink and Abdul Rahim, 2018 [89] | Mohammad, Gamble and Creedy, 2011 [29]                                                                                | Yes | Yes | Unclear | Unclear |
| Qutteina, Nasrallah, James-Hawkins, Nur, Yount, Hennink and Abdul Rahim, 2018 [89] | Masmoudi, Tabelsi, Charfeddine, Ben Ayed, Guermazzi and Jaoua, 2008 [35]                                              | Yes | Yes | Unclear | Yes     |
| Qutteina, Nasrallah, James-Hawkins, Nur, Yount, Hennink and Abdul Rahim, 2018 [89] | Masmoudi, Trabelsi, Charfeddine, Ben Ayed, Guermazi, Jaoua, Karam and Hantouche, 2010 [87]                            | Yes | Yes | Unclear | Yes     |
| Qutteina, Nasrallah, James-Hawkins, Nur, Yount, Hennink and Abdul Rahim, 2018 [89] | Masmoudi, Charfeddine, Trabelsi, Feki, Ben Ayad, Guermazi, Baati and Jaoua, 2014 [86]                                 | Yes | Yes | Unclear | Yes     |
| Qutteina, Nasrallah, James-Hawkins, Nur, Yount, Hennink and Abdul Rahim, 2018 [89] | Osman, Saliba, Chaaya and Naasan, 2014 [94]                                                                           | Yes | Yes | Unclear | Yes     |
| Qutteina, Nasrallah, James-Hawkins, Nur, Yount, Hennink and Abdul Rahim, 2018 [89] | Yehia, Callister and Hamdan-Mansour, 2013 [31]                                                                        | Yes | Yes | Unclear | Yes     |
| Sawyer, Ayers and Smith, 2010 [20]                                                 | Agoub, Moussaoui and Battas, 2005 [22]                                                                                | Yes | Yes | No      | No      |
| Sawyer, Ayers and Smith, 2010 [20]                                                 | Alami, Kadri and Berrada, 2006 [28]                                                                                   | Yes | Yes | No      | No      |
| Shorey, Chee, Ng, Chan, Tam and Chong, 2018 [21]                                   | Khalifa, Glavin, Bjertness and Lien, 2015 [54]                                                                        | Yes | Yes | No      | Yes     |
| Stewart, 2007 [55]                                                                 | Rahman, Lovel, Bunn, Iqbal and Harrington, 2004 [57]                                                                  | Yes | Yes | No      | Yes     |
| Stewart, 2007 [55]                                                                 | Rahman, Iqbal, Bunn, Lovel and Harrington, 2004 [56]                                                                  | Yes | Yes | No      | Yes     |
| Zahidie and Jamali, 2013 [38]                                                      | Ali, Ali and Azam, 2009 [58]                                                                                          | Yes | Yes | Unclear | Yes     |
| Zahidie and Jamali, 2013 [38]                                                      | Husain, Parveen, Husain, Saeed, Jafri, Rahman, Tomenson and Chaudhry, 2011 [47]                                       | Yes | Yes | Unclear | Yes     |
| Zahidie and Jamali, 2013 [38]                                                      | Asad, Karmaliani, Sullaiman, Bann, McClure, Pasha, Wright and Goldenberg, 2010 [59]                                   | Yes | Yes | Unclear | Yes     |

---

|                               |                                                            |     |     |         |     |
|-------------------------------|------------------------------------------------------------|-----|-----|---------|-----|
| Zahidie and Jamali, 2013 [38] | Zahidie, Kazi, Fatmi, Bhatti and<br>Dureshahwar, 2011 [53] | Yes | Yes | Unclear | Yes |
|-------------------------------|------------------------------------------------------------|-----|-----|---------|-----|

---

**Table S8: Categorization of Risk Factors**

| <b>Primary risk Category</b>                                                                                                                                                                                                                                                                                                                                                                                                                                                                                                                                                                                                                                                                                                                                                                                                                                                                                                                                                                                                                                                                                                                                                                                                                                                                                                                                                                                                                                                                                                                                                                                                                                                                                                                                                                                                                                                                                                                                                                                                                    | <b>Secondary category</b>                                | <b>Risk Factors</b>                                                                                                                                                                                                                                                                                                                                   |
|-------------------------------------------------------------------------------------------------------------------------------------------------------------------------------------------------------------------------------------------------------------------------------------------------------------------------------------------------------------------------------------------------------------------------------------------------------------------------------------------------------------------------------------------------------------------------------------------------------------------------------------------------------------------------------------------------------------------------------------------------------------------------------------------------------------------------------------------------------------------------------------------------------------------------------------------------------------------------------------------------------------------------------------------------------------------------------------------------------------------------------------------------------------------------------------------------------------------------------------------------------------------------------------------------------------------------------------------------------------------------------------------------------------------------------------------------------------------------------------------------------------------------------------------------------------------------------------------------------------------------------------------------------------------------------------------------------------------------------------------------------------------------------------------------------------------------------------------------------------------------------------------------------------------------------------------------------------------------------------------------------------------------------------------------|----------------------------------------------------------|-------------------------------------------------------------------------------------------------------------------------------------------------------------------------------------------------------------------------------------------------------------------------------------------------------------------------------------------------------|
| <p><b>Relational</b> Sarwar, 1990 [7, Muneer, Minhas, Tamiz-ud-Din Nizami, Mujeeb and Usmani, 2009 [10, Karmaliani, Asad, Bann, Moss, McClure, Pasha, Wright and Goldenberg, 2009 [12, Yasmeen, Tayyaba, Chatan, Naeem, Numan and Adnan Maqsood, 2010 [14, Shah, Bowen, Afridi, Nowshad and Muhajarine, 2011 [15, Abou-Saleh and Ghubash, 1997 [17, Agoub, Moussaoui and Battas, 2005 [22, Bener, Gerber and Sheikh, 2012 [23, Chaaya, Campbell, El Kak, Shaar, Harb and Kaddour, 2002 [25, Green, Broome and Mirabella, 2006 [26, Hamdan and Tamim, 2011 [27, Alami, Kadri and Berrada, 2006 [28, Mohammad, Gamble and Creedy, 2011 [29, Saleh el, El-Bahei, Del El-Hadidy and Zayed, 2013 [30, Yehia, Callister and Hamdan-Mansour, 2013 [31, Al Hinai and Al Hinai, 2014 [32, Masmoudi, Tabelsi, Charfeddine, Ben Ayed, Guermazzi and Jaoua, 2008 [35, Rahman, Iqbal and Harrington, 2003 [39, Husain, Bevc, Husain, Chaudhry, Atif and Rahman, 2006 [40, Rahman and Creed, 2007 [41, Kalyani, Saeed, Rehman and Mubbashar, 2001 [42, Ali, Ali and Azam, 2009 [58, Asad, Karmaliani, Sullaiman, Bann, McClure, Pasha, Wright and Goldenberg, 2010 [59, Gulamani, Premji, Kanji and Azam, 2013 [60, Kazi, Fatmi, Hatcher, Kadir, Niaz and Wasserman, 2006 [62, Afzal and Khalid, 2014 [69, Munaf, 2006 [71, Ghazala Sadiq, 2015 [72, Al Dallal and Grant, 2012 [73, Bener, Burgut, Ghuloum and Sheikh, 2012 [74, Abdelhai and Mosleh, 2015 [76, Abujilban, Abuidhail, Al-Modallal, Hamaideh and Mosemli, 2014 [78, Al-Azri, Al-Lawati, Al-Kamyani, Al-Kiyumi, Al-Rawahi, Davidson and Al-Maniri, 2016 [79, Lteif, Kesrouani and Richa, 2005 [85, Masmoudi, Trabelsi, Charfeddine, Ben Ayed, Guermazi, Jaoua, Karam and Hantouche, 2010 [87, Alasoom and Koura, 2014 [90, El-Hachem, Rohayem, Bou Khalil, Richa, Kesrouani, Gemayel, Aouad, Hatab, Zaccak, Yaghi, Salameh and Attieh, 2014 [91, Nayak and Al-Yattama, 1999 [93, Osman, Saliba, Chaaya and Naasan, 2014 [94, Amr and Hussein Balaha, 2010 [95, Ghubash and Eapen, 2009 [96]</p> | <p><b>Spousal relationships</b></p>                      | <p>Domestic violence, Assault history (familial or non-familial), Verbal or physical/ sexual abuse, Marital difficulty, Relationship with spouse, Satisfaction in married life, Spousal support, Partner support, Sexual relationship prior to pregnancy, Sexual relationship during pregnancy, Husband away, Polygamy</p>                            |
|                                                                                                                                                                                                                                                                                                                                                                                                                                                                                                                                                                                                                                                                                                                                                                                                                                                                                                                                                                                                                                                                                                                                                                                                                                                                                                                                                                                                                                                                                                                                                                                                                                                                                                                                                                                                                                                                                                                                                                                                                                                 | <p><b>Parent/ caregiver-child relationships</b></p>      | <p>Unplanned pregnancy, Number of living children, Parity, Ability to carry out daily activities</p>                                                                                                                                                                                                                                                  |
|                                                                                                                                                                                                                                                                                                                                                                                                                                                                                                                                                                                                                                                                                                                                                                                                                                                                                                                                                                                                                                                                                                                                                                                                                                                                                                                                                                                                                                                                                                                                                                                                                                                                                                                                                                                                                                                                                                                                                                                                                                                 | <p><b>Parental physical or mental health</b></p>         | <p>Social support, Traditional practice (chilla period), Religious practices, Help at home /Family support, Type of family, Maternal help, Paternal presence, Confidants or friends, Relationship with mother-in-law, Familial relationships, Familial conflicts, Sick relatives, Alcoholism in family, self-image, Self-esteem and self-efficacy</p> |
|                                                                                                                                                                                                                                                                                                                                                                                                                                                                                                                                                                                                                                                                                                                                                                                                                                                                                                                                                                                                                                                                                                                                                                                                                                                                                                                                                                                                                                                                                                                                                                                                                                                                                                                                                                                                                                                                                                                                                                                                                                                 | <p><b>Community environment</b></p>                      | <p>Sex of the baby</p>                                                                                                                                                                                                                                                                                                                                |
| <p><b>Psychological</b> Sarwar, 1990 [7, Muneer, Minhas, Tamiz-ud-Din Nizami, Mujeeb and Usmani, 2009 [10, Karmaliani, Asad, Bann, Moss, McClure, Pasha, Wright and Goldenberg, 2009 [12, Yasmeen, Tayyaba, Chatan,</p>                                                                                                                                                                                                                                                                                                                                                                                                                                                                                                                                                                                                                                                                                                                                                                                                                                                                                                                                                                                                                                                                                                                                                                                                                                                                                                                                                                                                                                                                                                                                                                                                                                                                                                                                                                                                                         | <p><b>Psychosocial vulnerabilities and strengths</b></p> | <p>Financial independence of the woman, Education levels (Low and High VS med, Secondary or low VS University, Literate VS</p>                                                                                                                                                                                                                        |

|                                                                                                                                                                                                                                                                                                                                                                                                                                                                                                                                                                                                                                                                                                                                                                                                                                                                                                                                                                                                                                                                                                                                                                                                      |                                                                                                                                                                                                                                                                                                                                |
|------------------------------------------------------------------------------------------------------------------------------------------------------------------------------------------------------------------------------------------------------------------------------------------------------------------------------------------------------------------------------------------------------------------------------------------------------------------------------------------------------------------------------------------------------------------------------------------------------------------------------------------------------------------------------------------------------------------------------------------------------------------------------------------------------------------------------------------------------------------------------------------------------------------------------------------------------------------------------------------------------------------------------------------------------------------------------------------------------------------------------------------------------------------------------------------------------|--------------------------------------------------------------------------------------------------------------------------------------------------------------------------------------------------------------------------------------------------------------------------------------------------------------------------------|
| <p>Naeem, Numan and Adnan Maqsood, 2010 [14, Agoub, Moussaoui and Battas, 2005 [22, Bener, Gerber and Sheikh, 2012 [23, Chaaya, Campbell, El Kak, Shaar, Harb and Kaddour, 2002 [25, Green, Broome and Mirabella, 2006 [26, Hamdan and Tamim, 2011 [27, Alami, Kadri and Berrada, 2006 [28, Mohammad, Gamble and Creedy, 2011 [29, Masmoudi, Tabelsi, Charfeddine, Ben Ayed, Guermazzi and Jaoua, 2008 [35, Rahman, Iqbal and Harrington, 2003 [39, Husain, Bevc, Husain, Chaudhry, Atif and Rahman, 2006 [40, Rahman and Creed, 2007 [41, Al Dallal and Grant, 2012 [73, Bener, Burgut, Ghuloum and Sheikh, 2012 [74, Abuidhail and Abujilban, 2014 [77, Abujilban, Abuidhail, Al-Modallal, Hamaideh and Mosemli, 2014 [78, Al-Azri, Al-Lawati, Al-Kamyani, Al-Kiyumi, Al-Rawahi, Davidson and Al-Maniri, 2016 [79, Alharbi and Abdulghani, 2014 [80, Bener, 2013 [81, Burgut, Bener, Ghuloum and Sheikh, 2013 [82, El-Khoury, Karam and Melhem, 1999 [83, Khabour, Amarneh, Bani Hani and Lataifeh, 2013 [84, Masmoudi, Charfeddine, Trabelsi, Feki, Ben Ayad, Guerhazi, Baati and Jaoua, 2014 [86, Masmoudi, Trabelsi, Charfeddine, Ben Ayed, Guerhazi, Jaoua, Karam and Hantouche, 2010 [87]</p> | <p>illiterate), Parenting knowledge/ skills, Employment status VS working)</p>                                                                                                                                                                                                                                                 |
| <p><b>Physiological and health</b> Haider, 2010 [13, Agoub, Moussaoui and Battas, 2005 [22, Chaaya, Campbell, El Kak, Shaar, Harb and Kaddour, 2002 [25, Green, Broome and Mirabella, 2006 [26, Hamdan and Tamim, 2011 [27, Alami, Kadri and Berrada, 2006 [28, Saleh el, El-Bahei, Del El-Hadidy and Zayed, 2013 [30, Yehia, Callister and Hamdan-Mansour, 2013 [31, Rahman, Iqbal and Harrington, 2003 [39, Husain, Parveen, Husain, Saeed, Jafri, Rahman, Tomenson and Chaudhry, 2011 [47, Ali, Ali and Azam, 2009 [58, Gulamani, Premji, Kanji and Azam, 2013 [60, Kazi, Fatmi, Hatcher, Kadir, Niaz and Wasserman, 2006 [62, Amr and Hussein Balaha, 2010 [95, Ghubash and Eapen, 2009 [96]</p>                                                                                                                                                                                                                                                                                                                                                                                                                                                                                                 | <p><b>Neuropsychological and neurodevelopmental indicators</b></p>                                                                                                                                                                                                                                                             |
| <p><b>Occupational</b> Al Hinai and Al Hinai, 2014 [32, Lteif, Kesrouani and Richa, 2005 [85]</p>                                                                                                                                                                                                                                                                                                                                                                                                                                                                                                                                                                                                                                                                                                                                                                                                                                                                                                                                                                                                                                                                                                    | <p><b>Mental health history</b></p>                                                                                                                                                                                                                                                                                            |
| <p><b>Sociodemographic</b> Muneer, Minhas, Tamiz-ud-Din Nizami, Mujeeb and Usmani, 2009 [10, Karmaliani, Asad, Bann, Moss, McClure, Pasha, Wright</p>                                                                                                                                                                                                                                                                                                                                                                                                                                                                                                                                                                                                                                                                                                                                                                                                                                                                                                                                                                                                                                                | <p>Antenatal depression, Postpartum blues, Mental illness in the antenatal period</p>                                                                                                                                                                                                                                          |
| <p><b>Physiological and health</b> Haider, 2010 [13, Agoub, Moussaoui and Battas, 2005 [22, Chaaya, Campbell, El Kak, Shaar, Harb and Kaddour, 2002 [25, Green, Broome and Mirabella, 2006 [26, Hamdan and Tamim, 2011 [27, Alami, Kadri and Berrada, 2006 [28, Saleh el, El-Bahei, Del El-Hadidy and Zayed, 2013 [30, Yehia, Callister and Hamdan-Mansour, 2013 [31, Rahman, Iqbal and Harrington, 2003 [39, Husain, Parveen, Husain, Saeed, Jafri, Rahman, Tomenson and Chaudhry, 2011 [47, Ali, Ali and Azam, 2009 [58, Gulamani, Premji, Kanji and Azam, 2013 [60, Kazi, Fatmi, Hatcher, Kadir, Niaz and Wasserman, 2006 [62, Amr and Hussein Balaha, 2010 [95, Ghubash and Eapen, 2009 [96]</p>                                                                                                                                                                                                                                                                                                                                                                                                                                                                                                 | <p><b>Physiological vulnerabilities and strengths</b></p>                                                                                                                                                                                                                                                                      |
| <p><b>Occupational</b> Al Hinai and Al Hinai, 2014 [32, Lteif, Kesrouani and Richa, 2005 [85]</p>                                                                                                                                                                                                                                                                                                                                                                                                                                                                                                                                                                                                                                                                                                                                                                                                                                                                                                                                                                                                                                                                                                    | <p>Disability, Chronic health problems</p>                                                                                                                                                                                                                                                                                     |
| <p><b>Sociodemographic</b> Muneer, Minhas, Tamiz-ud-Din Nizami, Mujeeb and Usmani, 2009 [10, Karmaliani, Asad, Bann, Moss, McClure, Pasha, Wright</p>                                                                                                                                                                                                                                                                                                                                                                                                                                                                                                                                                                                                                                                                                                                                                                                                                                                                                                                                                                                                                                                | <p><b>Obstetric and perinatal factors</b></p>                                                                                                                                                                                                                                                                                  |
| <p><b>Physiological and health</b> Haider, 2010 [13, Agoub, Moussaoui and Battas, 2005 [22, Chaaya, Campbell, El Kak, Shaar, Harb and Kaddour, 2002 [25, Green, Broome and Mirabella, 2006 [26, Hamdan and Tamim, 2011 [27, Alami, Kadri and Berrada, 2006 [28, Saleh el, El-Bahei, Del El-Hadidy and Zayed, 2013 [30, Yehia, Callister and Hamdan-Mansour, 2013 [31, Rahman, Iqbal and Harrington, 2003 [39, Husain, Parveen, Husain, Saeed, Jafri, Rahman, Tomenson and Chaudhry, 2011 [47, Ali, Ali and Azam, 2009 [58, Gulamani, Premji, Kanji and Azam, 2013 [60, Kazi, Fatmi, Hatcher, Kadir, Niaz and Wasserman, 2006 [62, Amr and Hussein Balaha, 2010 [95, Ghubash and Eapen, 2009 [96]</p>                                                                                                                                                                                                                                                                                                                                                                                                                                                                                                 | <p>Difficulty in delivery, Mode of delivery (Caesarean delivery VS Vaginal delivery), Previous miscarriage/ difficult pregnancies, Complications during pregnancy, Anaemia, Difficulty in breast feeding, Baby's health problems (cyanosis/ apnoea/flaccidity), Preterm infants, Concerns about well-being of unborn baby,</p> |
| <p><b>Occupational</b> Al Hinai and Al Hinai, 2014 [32, Lteif, Kesrouani and Richa, 2005 [85]</p>                                                                                                                                                                                                                                                                                                                                                                                                                                                                                                                                                                                                                                                                                                                                                                                                                                                                                                                                                                                                                                                                                                    | <p><b>Work environment</b></p>                                                                                                                                                                                                                                                                                                 |
| <p><b>Sociodemographic</b> Muneer, Minhas, Tamiz-ud-Din Nizami, Mujeeb and Usmani, 2009 [10, Karmaliani, Asad, Bann, Moss, McClure, Pasha, Wright</p>                                                                                                                                                                                                                                                                                                                                                                                                                                                                                                                                                                                                                                                                                                                                                                                                                                                                                                                                                                                                                                                | <p>Work difficulties</p>                                                                                                                                                                                                                                                                                                       |
| <p><b>Physiological and health</b> Haider, 2010 [13, Agoub, Moussaoui and Battas, 2005 [22, Chaaya, Campbell, El Kak, Shaar, Harb and Kaddour, 2002 [25, Green, Broome and Mirabella, 2006 [26, Hamdan and Tamim, 2011 [27, Alami, Kadri and Berrada, 2006 [28, Saleh el, El-Bahei, Del El-Hadidy and Zayed, 2013 [30, Yehia, Callister and Hamdan-Mansour, 2013 [31, Rahman, Iqbal and Harrington, 2003 [39, Husain, Parveen, Husain, Saeed, Jafri, Rahman, Tomenson and Chaudhry, 2011 [47, Ali, Ali and Azam, 2009 [58, Gulamani, Premji, Kanji and Azam, 2013 [60, Kazi, Fatmi, Hatcher, Kadir, Niaz and Wasserman, 2006 [62, Amr and Hussein Balaha, 2010 [95, Ghubash and Eapen, 2009 [96]</p>                                                                                                                                                                                                                                                                                                                                                                                                                                                                                                 | <p><b>Employee health</b></p>                                                                                                                                                                                                                                                                                                  |
| <p><b>Occupational</b> Al Hinai and Al Hinai, 2014 [32, Lteif, Kesrouani and Richa, 2005 [85]</p>                                                                                                                                                                                                                                                                                                                                                                                                                                                                                                                                                                                                                                                                                                                                                                                                                                                                                                                                                                                                                                                                                                    | <p><b>High risk occupations/ roles</b></p>                                                                                                                                                                                                                                                                                     |
| <p><b>Sociodemographic</b> Muneer, Minhas, Tamiz-ud-Din Nizami, Mujeeb and Usmani, 2009 [10, Karmaliani, Asad, Bann, Moss, McClure, Pasha, Wright</p>                                                                                                                                                                                                                                                                                                                                                                                                                                                                                                                                                                                                                                                                                                                                                                                                                                                                                                                                                                                                                                                | <p><b>Non-modifiable sociodemographic factors</b></p>                                                                                                                                                                                                                                                                          |
| <p><b>Physiological and health</b> Haider, 2010 [13, Agoub, Moussaoui and Battas, 2005 [22, Chaaya, Campbell, El Kak, Shaar, Harb and Kaddour, 2002 [25, Green, Broome and Mirabella, 2006 [26, Hamdan and Tamim, 2011 [27, Alami, Kadri and Berrada, 2006 [28, Saleh el, El-Bahei, Del El-Hadidy and Zayed, 2013 [30, Yehia, Callister and Hamdan-Mansour, 2013 [31, Rahman, Iqbal and Harrington, 2003 [39, Husain, Parveen, Husain, Saeed, Jafri, Rahman, Tomenson and Chaudhry, 2011 [47, Ali, Ali and Azam, 2009 [58, Gulamani, Premji, Kanji and Azam, 2013 [60, Kazi, Fatmi, Hatcher, Kadir, Niaz and Wasserman, 2006 [62, Amr and Hussein Balaha, 2010 [95, Ghubash and Eapen, 2009 [96]</p>                                                                                                                                                                                                                                                                                                                                                                                                                                                                                                 | <p>Age, Age at marriage, Duration of marriage</p>                                                                                                                                                                                                                                                                              |

and Goldenberg, 2009 [12, Yasmeen, Tayyaba, Chatan, Naeem, Numan and Adnan Maqsood, 2010 [14, Agoub, Moussaoui and Battas, 2005 [22, Bener, Gerber and Sheikh, 2012 [23, Chaaya, Campbell, El Kak, Shaar, Harb and Kaddour, 2002 [25, Green, Broome and Mirabella, 2006 [26, Hamdan and Tamim, 2011 [27, Alami, Kadri and Berrada, 2006 [28, Mohammad, Gamble and Creedy, 2011 [29, Saleh el, El-Bahei, Del El-Hadidy and Zayed, 2013 [30, Yehia, Callister and Hamdan-Mansour, 2013 [31, Al Hinai and Al Hinai, 2014 [32, Naglaa A. Mohamed and Maklof, 2011 [33, Rahman, Iqbal and Harrington, 2003 [39, Rahman and Creed, 2007 [41, Zahidie, Kazi, Fatmi, Bhatti and Dureshahwar, 2011 [53, Kazi, Fatmi, Hatcher, Kadir, Niaz and Wasserman, 2006 [62, Ghazala Sadiq, 2015 [72, Al Dallal and Grant, 2012 [73, Bener, Burgut, Ghuloum and Sheikh, 2012 [74, Abdelhai and Mosleh, 2015 [76, Al-Azri, Al-Lawati, Al-Kamyani, Al-Kiyumi, Al-Rawahi, Davidson and Al-Maniri, 2016 [79, Alharbi and Abdulghani, 2014 [80, Burgut, Bener, Ghuloum and Sheikh, 2013 [82, Khabour, Amarneh, Bani Hani and Lataifeh, 2013 [84, Amr and Hussein Balaha, 2010 [95]

**Modifiable sociodemographic factors**

Husband's monthly income, Husband's employment, Family wealth, Financial distress, Satisfaction with income, Husband's education levels, Place of residence (Urban VS Rural)

**Predictors of response to trauma**

Sarwar, 1990 [7, Haider, 2010 [13, Abou-Saleh and Ghubash, 1997 [17, Agoub, Moussaoui and Battas, 2005 [22, Chaaya, Campbell, El Kak, Shaar, Harb and Kaddour, 2002 [25, Hamdan and Tamim, 2011 [27, Alami, Kadri and Berrada, 2006 [28, Balaha, Amr, El-Gilany and Sheikh, 2009 [34, Rahman, Iqbal and Harrington, 2003 [39, Husain, Benc, Husain, Chaudhry, Atif and Rahman, 2006 [40, Kalyani, Saeed, Rehman and Mubbashar, 2001 [42, Kazi, Fatmi, Hatcher, Kadir, Niaz and Wasserman, 2006 [62, Amr and Hussein Balaha, 2010 [95]; Saleh el, El-Bahei, Del El-Hadidy and Zayed, 2013 [30, Naglaa A. Mohamed and Maklof, 2011 [33, Husain, Parveen, Husain, Saeed, Jafri, Rahman, Tomenson and Chaudhry, 2011 [47]

Stressful life events in the preceding year, Threatening life events, Early loss of mother, Psychiatric history, Psychiatric disorders

**Lifestyle**

**Diet**

**Physical activity**

**Risk behaviour**

**Mental activity**

**Chemical and physical exposures**

**Media exposures**

**Negative environmental exposures**

**Genetic**

No study reported these risk factors

### References

1. Moher, D., A. Liberati, J. Tetzlaff, and D. G. Altman. "Preferred Reporting Items for Systematic Reviews and Meta-Analyses: The Prisma Statement." *J Clin Epidemiol* 62, no. 10 (2009): 1006-12.
2. Zorzela, Liliane, Yoon K Loke, John P Ioannidis, Su Golder, Pasqualina Santaguida, Douglas G Altman, David Moher, and Sunita Vohra. "Prisma Harms Checklist: Improving Harms Reporting in Systematic Reviews." *Bmj* 352 (2016): i157.
3. Beller, E. M., P. P. Glasziou, D. G. Altman, S. Hopewell, H. Bastian, I. Chalmers, P. C. Gotsche, T. Lasserson, and D. Tovey. "Prisma for Abstracts: Reporting Systematic Reviews in Journal and Conference Abstracts." *PLoS Med* 10, no. 4 (2013): e1001419.
4. Afzal, Sidra, and Ruhi Khalid. "Postnatal Affective Disorders: Mapping the Research in Pakistan." (2016).
5. Rasheed, H., & Khalid, R. . "Maternity Blues and Symptoms of Puerperal Depression Four Weeks after Child Birth: A Comparative Study. ." (1988).
6. Khalid, Ruhi. "Maternity Blues and Puerperal Depression in Pakistani Women." *Pakistan Journal of Psychological Research* 4 (1989): 3-4.
7. Sarwar, A., & Khalid, R. "To Study Postnatal Depression among Pakistani Women." (1990).
8. Habib, S., & Khalid, R. . "Pregnancy Related Psychiatric Problems." (1997).
9. Ahmed, Maria khan and Iftikhar. "Risk Factors Associated with Postnatal Depression in Pakistani Women." *Pakistan Journal of Social and Clinical Psychology* 3 (2005): 41-50.
10. Muneer, A., F. A. Minhas, A. Tamiz-ud-Din Nizami, F. Mujeeb, and A. T. Usmani. "Frequency and Associated Factors for Postnatal Depression." *Journal of the College of Physicians and Surgeons--Pakistan* 19, no. 4 (2009): 236-9.
11. Mahendran, R., S. Puthussery, and M. Amalan. "Prevalence of Antenatal Depression in South Asia: A Systematic Review and Meta-Analysis." *Journal of Epidemiology and Community Health* 73, no. 8 (2019): 768-77.
12. Karmaliani, R., N. Asad, C. M. Bann, N. Moss, E. M. McClure, O. Pasha, L. L. Wright, and R. L. Goldenberg. "Prevalence of Anxiety, Depression and Associated Factors among Pregnant Women of Hyderabad, Pakistan." *International Journal of Social Psychiatry* 55, no. 5 (2009): 414-24.
13. Haider, Imran &. "Screening of Antenatal Depression in Pakistan: Risk Factors and Effects on Obstetric and Neonatal Outcomes." *Asia-Pacific Psychiatry* 2 (2010): 26-32.
14. Yasmeen, Khooharo, Majeed Tayyaba, Das Chatan, Majeed Naeem, Majeed Numan, and Choudhry Adnan Maqsood. "Associated Risk Factors for Postpartum Depression Presenting at a Teaching Hospital." *Annals of King Edward Medical University* 16, no. 2 (2010).
15. Shah, S. M., A. Bowen, I. Afridi, G. Nowshad, and N. Muhajarine. "Prevalence of Antenatal Depression: Comparison between Pakistani and Canadian Women." *Journal of the Pakistan Medical Association* 61, no. 3 (2011): 242-6.
16. Alhasanat, Dalia, and Judith Fry-McComish. "Postpartum Depression among Immigrant and Arabic Women: Literature Review." *Journal of Immigrant and Minority Health* 17, no. 6 (2015): 1882-94.
17. Abou-Saleh, M. T., and R. Ghubash. "The Prevalence of Early Postpartum Psychiatric Morbidity in Dubai: A Transcultural Perspective." *Acta Psychiatrica Scandinavica* 95, no. 5 (1997): 428-32.
18. Amber Haque, Azimeh Namavar, Kelly-Ann Breene. "Prevalence and Risk Factors of Postpartum Depression in Middle Eastern/Arab Women." *Journal of Muslim Mental Health* 9, no. 1 (2015).
19. Fisher, J., M. Cabral de Mello, V. Patel, A. Rahman, T. Tran, S. Holton, and W. Holmes. "Prevalence and Determinants of Common Perinatal Mental Disorders in Women in Low- and Lower-Middle-Income Countries: A Systematic Review." *Bull World Health Organ* 90, no. 2 (2012): 139g-49g.
20. Sawyer, A., S. Ayers, and H. Smith. "Pre- and Postnatal Psychological Wellbeing in Africa: A Systematic Review." *Journal of Affective Disorders* 123, no. 1-3 (2010): 17-29.



21. Shorey, S., C. Y. I. Chee, E. D. Ng, Y. H. Chan, W. W. S. Tam, and Y. S. Chong. "Prevalence and Incidence of Postpartum Depression among Healthy Mothers: A Systematic Review and Meta-Analysis." *Journal of Psychiatric Research* 104 (2018): 235-48.
22. Agoub, M., D. Moussaoui, and O. Battas. "Prevalence of Postpartum Depression in a Moroccan Sample." *Arch Womens Ment Health* 8, no. 1 (2005): 37-43.
23. Bener, A., L. M. Gerber, and J. Sheikh. "Prevalence of Psychiatric Disorders and Associated Risk Factors in Women During Their Postpartum Period: A Major Public Health Problem and Global Comparison." *Int J Womens Health* 4 (2012): 191-200.
24. Klainin, P., and D. G. Arthur. "Postpartum Depression in Asian Cultures: A Literature Review." *International Journal of Nursing Studies* 46, no. 10 (2009): 1355-73.
25. Chaaya, M., O. M. Campbell, F. El Kak, D. Shaar, H. Harb, and A. Kaddour. "Postpartum Depression: Prevalence and Determinants in Lebanon." *Arch Womens Ment Health* 5, no. 2 (2002): 65-72.
26. Green, K., H. Broome, and J. Mirabella. "Postnatal Depression among Mothers in the United Arab Emirates: Socio-Cultural and Physical Factors." *Psychology, Health & Medicine* 11, no. 4 (2006): 425-31.
27. Hamdan, A., and H. Tamim. "Psychosocial Risk and Protective Factors for Postpartum Depression in the United Arab Emirates." *Arch Womens Ment Health* 14, no. 2 (2011): 125-33.
28. Alami, K. M., N. Kadri, and S. Berrada. "Prevalence and Psychosocial Correlates of Depressed Mood During Pregnancy and after Childbirth in a Moroccan Sample." *Arch Womens Ment Health* 9, no. 6 (2006): 343-6.
29. Mohammad, K. I., J. Gamble, and D. K. Creedy. "Prevalence and Factors Associated with the Development of Antenatal and Postnatal Depression among Jordanian Women." *Midwifery* 27, no. 6 (2011): e238-45.
30. Saleh el, S., W. El-Bahei, M. A. Del El-Hadidy, and A. Zayed. "Predictors of Postpartum Depression in a Sample of Egyptian Women." *Neuropsychiatric Disease and Treatment* 9 (2013): 15-24.
31. Yehia, D. B., L. C. Callister, and A. Hamdan-Mansour. "Prevalence and Predictors of Postpartum Depression among Arabic Muslim Jordanian Women Serving in the Military." *Journal of Perinatal and Neonatal Nursing* 27, no. 1 (2013): 25-33; quiz 34-5.
32. Al Hinai, F. I., and S. S. Al Hinai. "Prospective Study on Prevalence and Risk Factors of Postpartum Depression in Al-Dakhliya Governorate in Oman." *Oman Medical Journal* 29, no. 3 (2014): 198-202.
33. Naglaa A. Mohamed, Ghadah A. Mahmoud, Nadia A. Said, K Hamida A. Abdelhafez , and and Ahmed M. A. Maklof. "Postpartum Depression: Prevalence and Predictors among Women at El Eman's Specialized Hospital " *Journal of American Science* 7 (12) (2011): 122-28.
34. Balaha, Magdy, Mostafa Amr, Abdel-Hady El-Gilany, and Farid Sheikh. "Obstetric and Psychiatric Outcomes in a Sample of Saudi Teen-Aged Mothers." *TAF Preventive Medicine Bulletin* 8 (2009).
35. Masmoudi, J., S. Tabelsi, F. Charfeddine, B. Ben Ayed, M. Guermazzi, and A. Jaoua. "[Study of the Prevalence of Postpartum Depression among 213 Tunisian Parturients]." *Gynécologie, Obstétrique & Fertilité* 36, no. 7-8 (2008): 782-7.
36. Karmaliani, R., C. M. Bann, M. A. Mahmood, H. S. Harris, S. Akhtar, R. L. Goldenberg, and N. Moss. "Measuring Antenatal Depression and Anxiety: Findings from a Community-Based Study of Women in Hyderabad, Pakistan." *Women and Health* 44, no. 3 (2006): 79-103.
37. Jones, E., and E. Coast. "Social Relationships and Postpartum Depression in South Asia: A Systematic Review." *International Journal of Social Psychiatry* 59, no. 7 (2013): 690-700.
38. Zahidie, A., and T. Jamali. "An Overview of the Predictors of Depression among Adult Pakistani Women." *Journal of the College of Physicians and Surgeons--Pakistan* 23, no. 8 (2013): 574-80.
39. Rahman, A., Z. Iqbal, and R. Harrington. "Life Events, Social Support and Depression in Childbirth: Perspectives from a Rural Community in the Developing World." *Psychological Medicine* 33, no. 7 (2003): 1161-7.

40. Husain, N., I. Bevc, M. Husain, I. B. Chaudhry, N. Atif, and A. Rahman. "Prevalence and Social Correlates of Postnatal Depression in a Low Income Country." *Arch Womens Ment Health* 9, no. 4 (2006): 197-202.
41. Rahman, A., and F. Creed. "Outcome of Prenatal Depression and Risk Factors Associated with Persistence in the First Postnatal Year: Prospective Study from Rawalpindi, Pakistan." *Journal of Affective Disorders* 100, no. 1-3 (2007): 115-21.
42. Kalyani, G. H. S., Khitam Saeed, Ch I. U. Rehman, and M. H. Mubbashar. "Incidence of Depressive Illness in Pakistani Women During Postnatal Period." *Journal of the College of Physicians and Surgeons Pakistan* 11(4) (2001): 246-48.
43. Ali, N. S., I. S. Azam, B. S. Ali, G. Tabbusum, and S. S. Moin. "Frequency and Associated Factors for Anxiety and Depression in Pregnant Women: A Hospital-Based Cross-Sectional Study." *ScientificWorldJournal* 2012 (2012): 653098.
44. Din, Z. U., S. Ambreen, Z. Iqbal, M. Iqbal, and S. Ahmad. "Determinants of Antenatal Psychological Distress in Pakistani Women." *Noro Psikiyatr Ars* 53, no. 2 (2016): 152-57.
45. Fareeha Hamid, Aftab Asif, Imran Ijaz Haider. "Study of Anxiety and Depression During Pregnancy." *Pakistan Journal of Medical Sciences* 24 (2008): 861-64.
46. Humayun, A., Haider, II, N. Imran, H. Iqbal, and N. Humayun. "Antenatal Depression and Its Predictors in Lahore, Pakistan." *East Mediterr Health J* 19, no. 4 (2013): 327-32.
47. Husain, N., A. Parveen, M. Husain, Q. Saeed, F. Jafri, R. Rahman, B. Tomenson, and I. B. Chaudhry. "Prevalence and Psychosocial Correlates of Perinatal Depression: A Cohort Study from Urban Pakistan." *Arch Womens Ment Health* 14, no. 5 (2011): 395-403.
48. Sharifa Mir, Rozina Karmaliani, Juanita Hatcher, Nargis Asad, Siham Sikander. "Prevalence and Risk Factors Contributing to Depression among Pregnant Women in District Chitral, Pakistan." *Journal of Pakistani Psychiatric Society* 9 (2012): 28-36.
49. Syeda Rabia, Uzma Nusrat, Sara Qazi, Hira Afreen. "Frequency and Risk Profiles Associated with Antenatal Anxiety and Depression in Middle Socioeconomic Women." *Annals Abbasi Shaheed Hospital & Karachi Medical & Dental College* 22 (2017): 88-96.
50. Sadaf, M. "Antenatal Screening for Postpartum Depression." *Journal of Rawalpindi Medical College* 15 (2011): 47-49.
51. Saeed, Ayesha, Tahira Raana, Amina Muhammad Saeed, and Ayesha Humayun. "Effect of Antenatal Depression on Maternal Dietary Intake and Neonatal Outcome: A Prospective Cohort." *Nutrition Journal* 15, no. 1 (2016): 64-64.
52. Waqas, A., N. Raza, H. W. Lodhi, Z. Muhammad, M. Jamal, and A. Rehman. "Psychosocial Factors of Antenatal Anxiety and Depression in Pakistan: Is Social Support a Mediator?" *PloS One* 10, no. 1 (2015): e0116510.
53. Zahidie, A., A. Kazi, Z. Fatmi, M. T. Bhatti, and S. Dureshahwar. "Social Environment and Depression among Pregnant Women in Rural Areas of Sind, Pakistan." *Journal of the Pakistan Medical Association* 61, no. 12 (2011): 1183-9.
54. Khalifa, D. S., K. Glavin, E. Bjertness, and L. Lien. "Postnatal Depression among Sudanese Women: Prevalence and Validation of the Edinburgh Postnatal Depression Scale at 3 Months Postpartum." *Int J Womens Health* 7 (2015): 677-84.
55. Stewart, R. C. "Maternal Depression and Infant Growth: A Review of Recent Evidence." *Maternal & Child Nutrition* 3, no. 2 (2007): 94-107.
56. Rahman, A., Z. Iqbal, J. Bunn, H. Lovel, and R. Harrington. "Impact of Maternal Depression on Infant Nutritional Status and Illness: A Cohort Study." *Archives of General Psychiatry* 61, no. 9 (2004): 946-52.
57. Rahman, A., H. Lovel, J. Bunn, Z. Iqbal, and R. Harrington. "Mothers' Mental Health and Infant Growth: A Case-Control Study from Rawalpindi, Pakistan." *Child: Care, Health and Development* 30, no. 1 (2004): 21-7.
58. Ali, N. S., B. S. Ali, and I. S. Azam. "Post Partum Anxiety and Depression in Peri-Urban Communities of Karachi, Pakistan: A Quasi-Experimental Study." *BMC Public Health* 9 (2009): 384.
59. Asad, N., R. Karmaliani, N. Sullaiman, C. M. Bann, E. M. McClure, O. Pasha, L. L. Wright, and R. L. Goldenberg. "Prevalence of Suicidal Thoughts and Attempts among Pregnant Pakistani Women." *Acta Obstetrica et Gynecologica Scandinavica* 89, no. 12 (2010): 1545-51.

60. Gulamani, Salima S., Shahirose Sadrudin Premji, ZeenatKhanu Kanji, and Syed Iqbal Azam. "A Review of Postpartum Depression, Preterm Birth, and Culture." *The Journal of Perinatal & Neonatal Nursing* 27, no. 1 (2013): 52-59.
61. Husain, Nusrat, Tariq Munshi, Farhat Jafri, Meher Husain, Asia Parveen, Qamar Saeed, Barbara Tomenson, Farooq Naeem, and Nasim Chaudhry. "Antenatal Depression Is Not Associated with Low-Birth Weight: A Study from Urban Pakistan." *Frontiers in Psychiatry* 5 (2014).
62. Kazi, Ambreen, Zafar Fatmi, Juanita Hatcher, Muhammad Masood Kadir, Unaiza Niaz, and Gail A. Wasserman. "Social Environment and Depression among Pregnant Women in Urban Areas of Pakistan: Importance of Social Relations." *Social Science & Medicine* 63, no. 6 (2006): 1466-76.
63. Al-Modayfer, Omar, Yousra Alatiq, Osaima Khair, and Sami Abdelkawi. "Postpartum Depression and Related Risk Factors among Saudi Females." *International Journal of Culture and Mental Health* 8, no. 3 (2015): 316-24.
64. Fuhr, D. C., C. Calvert, C. Ronsmans, P. S. Chandra, S. Sikander, M. J. De Silva, and V. Patel. "Contribution of Suicide and Injuries to Pregnancy-Related Mortality in Low-Income and Middle-Income Countries: A Systematic Review and Meta-Analysis." *Lancet Psychiatry* 1, no. 3 (2014): 213-25.
65. Farhat, E. B., M. Chaouch, H. Chelli, M. F. Gara, N. Boukraa, M. Garbouj, M. Hamrouni, A. Fourati, T. Calvez, and P. Thonneau. "Reduced Maternal Mortality in Tunisia and Voluntary Commitment to Gender-Related Concerns." *International Journal of Gynaecology and Obstetrics* 116, no. 2 (2012): 165-8.
66. Amarin, Z., Y. Khader, A. Okour, H. Jaddou, and R. Al-Qutob. "National Maternal Mortality Ratio for Jordan, 2007-2008." *International Journal of Gynaecology and Obstetrics* 111, no. 2 (2010): 152-6.
67. Jafarey, S. N., T. Rizvi, M. Koblinsky, and N. Kureshy. "Verbal Autopsy of Maternal Deaths in Two Districts of Pakistan--Filling Information Gaps." *Journal of Health, Population, and Nutrition* 27, no. 2 (2009): 170-83.
68. Population, Ministry of Health and. "The National Maternal Mortality Study:Egypt 2000." Egypt, 2001.
69. Afzal, Sidra, and Ruhi Khalid. "Social Support and Postnatal Depression in Pakistani Context." *Pakistan Journal of Social and Clinical Psychology* 12 (2014): 34-38.
70. Gul, Mirrat, Saqib Bajwa, Saima Niaz, Mariam Haroon, Saima Liaqat, Mafia Ahmad, Sana Dawood, Fiza Ghazal, Ali Abbass Bhatti, Sadia Nazir, Syeda Rabia Riffat, and Haroon Rashid Chaudhry. "Postnatal Depression and Its Comparison with the Gender of Newborn in Fourth Pregnancy." *International Journal of Culture and Mental Health* 6, no. 1 (2013): 16-28.
71. Munaf, Riaz ahmed and Seema. "Nuclear Family System as an Important Risk Factor for the Development of the Baby Blues." *Pakistan Journal of Social and Clinical Psychology* 4 (2006): 67-74.
72. Ghazala Sadiq, Shahzad Sadiq, Namrah Ali. "Evaluation of Postpartum Depression in Rawalpindi/ Islamabad Pakistan." *EC Gynaecology* 1.1 (2015): 19-25.
73. Al Dallal, F. H., and I. N. Grant. "Postnatal Depression among Bahraini Women: Prevalence of Symptoms and Psychosocial Risk Factors." *East Mediterr Health J* 18, no. 5 (2012): 439-45.
74. Bener, A., F. T. Burgut, S. Ghuloum, and J. Sheikh. "A Study of Postpartum Depression in a Fast Developing Country: Prevalence and Related Factors." *International Journal of Psychiatry in Medicine* 43, no. 4 (2012): 325-37.
75. James-Hawkins, L., E. Shaltout, A. A. Nur, C. Nasrallah, Y. Qutteina, H. F. Abdul Rahim, M. Hennink, and K. M. Yount. "Human and Economic Resources for Empowerment and Pregnancy-Related Mental Health in the Arab Middle East: A Systematic Review." *Arch Womens Ment Health* 22, no. 1 (2019): 1-14.
76. Abdelhai, R., and H. Mosleh. "Screening for Antepartum Anxiety and Depression and Their Association with Domestic Violence among Egyptian Pregnant Women." *Journal of the Egyptian Public Health Association* 90, no. 3 (2015): 101-8.
77. Abuidhail, J., and S. Abujilban. "Characteristics of Jordanian Depressed Pregnant Women: A Comparison Study." *Journal of Psychiatric and Mental Health Nursing* 21, no. 7 (2014): 573-9.
78. Abujilban, S. K., J. Abuidhail, H. Al-Modallal, S. Hamaideh, and O. Mosemli. "Predictors of Antenatal Depression among Jordanian Pregnant Women in Their Third Trimester." *Health Care for Women International* 35, no. 2 (2014): 200-15.

79. Al-Azri, M., I. Al-Lawati, R. Al-Kamyani, M. Al-Kiyumi, A. Al-Rawahi, R. Davidson, and A. Al-Maniri. "Prevalence and Risk Factors of Antenatal Depression among Omani Women in a Primary Care Setting: Cross-Sectional Study." *Sultan Qaboos University Medical Journal* 16, no. 1 (2016): e35-41.
80. Alharbi, A. A., and H. M. Abdulghani. "Risk Factors Associated with Postpartum Depression in the Saudi Population." *Neuropsychiatric Disease and Treatment* 10 (2014): 311-6.
81. Bener, A. "Psychological Distress among Postpartum Mothers of Preterm Infants and Associated Factors: A Neglected Public Health Problem." *Braz J Psychiatry* 35, no. 3 (2013): 231-6.
82. Burgut, F. T., A. Bener, S. Ghuloum, and J. Sheikh. "A Study of Postpartum Depression and Maternal Risk Factors in Qatar." *Journal of Psychosomatic Obstetrics and Gynaecology* 34, no. 2 (2013): 90-7.
83. El-Khoury, N., E. G. Karam, and N. M. Melhem. "[Depression and Pregnancy]." *Journal Medical Libanais. Lebanese Medical Journal* 47, no. 3 (1999): 169-74.
84. Khabour, O., B. Amarneh, E. Bani Hani, and I. Lataifeh. "Associations between Variations in Tph1 , Tph2 and Slc6a4 Genes and Postpartum Depression: A Study in the Jordanian Population." *Balkan Journal of Medical Genetics* 16, no. 1 (2013): 41-8.
85. Lteif, Y., A. Kesrouani, and S. Richa. "[Depressive Syndromes During Pregnancy: Prevalence and Risk Factors]." *Journal de Gynécologie, Obstétrique et Biologie de la Reproduction* 34, no. 3 Pt 1 (2005): 262-9.
86. Masmoudi, J., F. Charfeddine, S. Trabelsi, I. Feki, B. Ben Ayad, M. Guerhazi, I. Baati, and A. Jaoua. "[Postpartum Depression: Prevalence and Risk Factors. A Prospective Study Concerning 302 Tunisian Parturients]." *Tunisie Medicale* 92, no. 10 (2014): 615-21.
87. Masmoudi, J., S. Trabelsi, F. Charfeddine, B. Ben Ayed, M. Guerhazi, A. Jaoua, E. G. Karam, and E. G. Hantouche. "[Evaluation of Affective Temperaments in the Postpartum Depressive Symptomatology]." *Encephale* 36 Suppl 2 (2010): D14-21.
88. Stuchbery, M., S. Matthey, and B. Barnett. "Postnatal Depression and Social Supports in Vietnamese, Arabic and Anglo-Celtic Mothers." *Social Psychiatry and Psychiatric Epidemiology* 33, no. 10 (1998): 483-90.
89. Qutteina, Y., C. Nasrallah, L. James-Hawkins, A. A. Nur, K. M. Yount, M. Hennink, and H. F. Abdul Rahim. "Social Resources and Arab Women's Perinatal Mental Health: A Systematic Review." *Women Birth* 31, no. 5 (2018): 386-97.
90. Alasoom, L. I., and M. R. Koura. "Predictors of Postpartum Depression in the Eastern Province Capital of Saudi Arabia." *J Family Med Prim Care* 3, no. 2 (2014): 146-50.
91. El-Hachem, C., J. Rohayem, R. Bou Khalil, S. Richa, A. Kesrouani, R. Gemayel, N. Aouad, N. Hatab, E. Zaccak, N. Yaghi, S. Salameh, and E. Attieh. "Early Identification of Women at Risk of Postpartum Depression Using the Edinburgh Postnatal Depression Scale (Epds) in a Sample of Lebanese Women." *BMC Psychiatry* 14 (2014): 242.
92. Ghubash, R., and M. T. Abou-Saleh. "Postpartum Psychiatric Illness in Arab Culture: Prevalence and Psychosocial Correlates." *British Journal of Psychiatry* 171 (1997): 65-8.
93. Nayak, M. B., and M. Al-Yattama. "Assault Victim History as a Factor in Depression During Pregnancy." *Obstetrics and Gynecology* 94, no. 2 (1999): 204-8.
94. Osman, H., M. Saliba, M. Chaaya, and G. Naasan. "Interventions to Reduce Postpartum Stress in First-Time Mothers: A Randomized-Controlled Trial." *BMC Women's Health* 14 (2014): 125.
95. Amr, M. A., and M. H. Hussein Balaha. "Minor Psychiatric Morbidity in Young Saudi Mothers Using Mini International Neuropsychiatric Interview (Mini)." *Journal of the College of Physicians and Surgeons--Pakistan* 20, no. 10 (2010): 680-4.
96. Ghubash, R., and V. Eapen. "Postpartum Mental Illness: Perspectives from an Arabian Gulf Population." *Psychological Reports* 105, no. 1 (2009): 127-36.
